# Supplementary material
Source: PubMed Central journal article supplement (PMC3683624)
Supplement: NIHMS436539-supplement-Supplementary_Information.pdf [file NIHMS436539-supplement-Supplementary_Information.pdf]

## **Supplementary Information**

---

### **Subgroup specific structural variation across 1,000 medulloblastoma genomes**

**The Medulloblastoma Advanced Genomics International Consortium (MAGIC)**

# Table of Contents

|                             |                                                                                         |
|-----------------------------|-----------------------------------------------------------------------------------------|
| Supplementary Figures ..... | 1–49                                                                                    |
| Supplementary Figure 1.     | Genome-wide copy number profile of medulloblastoma subgroups                            |
| Supplementary Figure 2.     | nanoString classification of medulloblastoma                                            |
| Supplementary Figure 3.     | Unsupervised hierarchical clustering of broad and focal SCNAs in medulloblastoma        |
| Supplementary Figure 4.     | Somatic copy number aberrations in medulloblastoma                                      |
| Supplementary Figure 5.     | Verification of focal SCNAs by nanoString                                               |
| Supplementary Figure 6.     | WNT medulloblastoma                                                                     |
| Supplementary Figure 7.     | SNP6 copy number profile of WNT medulloblastoma                                         |
| Supplementary Figure 8.     | SNP6 copy number profile of SHH medulloblastoma                                         |
| Supplementary Figure 9.     | Significant overlap between SHH amplification genes and Shh target genes                |
| Supplementary Figure 10.    | SNP6 copy number profile of Group 3 medulloblastoma                                     |
| Supplementary Figure 11.    | SNP6 copy number profile of Group 4 medulloblastoma                                     |
| Supplementary Figure 12.    | Highly significant regions of focal amplification in SHH medulloblastoma                |
| Supplementary Figure 13.    | Highly significant regions of focal amplification in Group 3 medulloblastoma            |
| Supplementary Figure 14.    | Highly significant regions of focal amplification in Group 4 medulloblastoma            |
| Supplementary Figure 15.    | Evidence-based ranking of candidate target genes in SHH amplification regions           |
| Supplementary Figure 16.    | Evidence-based ranking of candidate target genes in SHH deletion regions                |
| Supplementary Figure 17.    | Evidence-based ranking of candidate target genes in Group 3 amplification regions       |
| Supplementary Figure 18.    | Evidence-based ranking of candidate target genes in Group 3 deletion regions            |
| Supplementary Figure 19.    | Evidence-based ranking of candidate target genes in Group 4 amplification regions       |
| Supplementary Figure 20.    | Evidence-based ranking of candidate target genes in Group 4 deletion regions            |
| Supplementary Figure 21.    | Significance of <i>MYC</i> amplification in Group 3 medulloblastoma                     |
| Supplementary Figure 22.    | Validation of <i>ACVR2B</i> amplification in medulloblastoma                            |
| Supplementary Figure 23.    | Recurrent focal deletions affecting negative regulators of the NF- $\kappa$ B pathway   |
| Supplementary Figure 24.    | Tandem duplication of <i>SNCAIP</i> on chr5q23.2 in Group 4 medulloblastoma             |
| Supplementary Figure 25.    | Paired-end sequencing & reconstruction of duplications overlapping <i>SNCAIP</i>        |
| Supplementary Figure 26.    | Somatic copy number gain of <i>SNCAIP</i> in Group 4 medulloblastoma                    |
| Supplementary Figure 27.    | <i>SNCAIP</i> expression in Group 4 medulloblastomas as measured by RNASeq              |
| Supplementary Figure 28.    | Validation of <i>SNCAIP</i> as a Group 4 signature gene in external expression datasets |
| Supplementary Figure 29.    | Identification of Group 4 medulloblastoma subtypes                                      |
| Supplementary Figure 30.    | SNP6 copy number profile of Group 4 $\alpha$ medulloblastoma                            |
| Supplementary Figure 31.    | SNP6 copy number profile of Group 4 $\beta$ medulloblastoma                             |
| Supplementary Figure 32.    | Unsupervised hierarchical clustering of broad and focal SCNAs in Group 4                |
| Supplementary Figure 33.    | Cytogenetic profile of <i>SNCAIP</i> duplicated Group 4 $\alpha$ medulloblastomas       |
| Supplementary Figure 34.    | Mutual exclusivity of focal SCNAs in Group 4 medulloblastoma                            |
| Supplementary Figure 35.    | Global association of somatic copy number aberrations and gene expression               |
| Supplementary Figure 36.    | Expression of candidate target genes is driven by copy number changes                   |
| Supplementary Figure 37.    | Co-amplification of <i>MYC</i> and <i>PVT1</i> in Group 3 medulloblastoma               |
| Supplementary Figure 38.    | Recurrent chromothripsis on chromosome 8 in Group 3 medulloblastoma                     |
| Supplementary Figure 39.    | Simulation of progressive genomic rearrangements of chromosome 8                        |
| Supplementary Figure 40.    | Chromosomal distribution of chromothripsis across medulloblastoma subgroups             |
| Supplementary Figure 41.    | Verification of <i>MYC</i> and miR-1204 knockdown in MED8A cells                        |
| Supplementary Tables .....  | 50–68                                                                                   |
| Supplementary Table 1.      | Summary of MAGIC SNP6 array profiling                                                   |
| Supplementary Table 2.      | Clinical features of the MAGIC cohort                                                   |
| Supplementary Table 3.      | Metadata of the MAGIC cohort (.xlsx)                                                    |
| Supplementary Table 4.      | GISTIC amplifications (.xlsx)                                                           |
| Supplementary Table 5.      | GISTIC deletions (.xlsx)                                                                |
| Supplementary Table 6.      | Driver genes amplified in medulloblastoma subgroups                                     |
| Supplementary Table 7.      | High amplitude SCNAs in medulloblastoma (.xlsx)                                         |
| Supplementary Table 8.      | WNT GISTIC regions: amplifications                                                      |
| Supplementary Table 9.      | Summary of <i>CTNNB1</i> sequencing in WNT tumours                                      |

|                         |                                                                    |
|-------------------------|--------------------------------------------------------------------|
| Supplementary Table 10. | SHH GISTIC regions: amplifications                                 |
| Supplementary Table 11. | SHH GISTIC regions: deletions                                      |
| Supplementary Table 12. | Group 3 GISTIC regions: amplifications                             |
| Supplementary Table 13. | Group 3 GISTIC regions: deletions                                  |
| Supplementary Table 14. | Group 4 GISTIC regions: amplifications                             |
| Supplementary Table 15. | Group 4 GISTIC regions: deletions                                  |
| Supplementary Table 16. | Actionable SCNAs in medulloblastoma (.xlsx)                        |
| Supplementary Table 17. | Summary of RNASeq data                                             |
| Supplementary Table 18. | PVT1 fusions identified by RNASeq                                  |
| Supplementary Table 19. | Summary of PVT1-MYC fusions identified by RT-PCR/Sanger sequencing |
| Supplementary Table 20. | Summary of WGS data                                                |
| Supplementary Table 21. | Summary of genomic rearrangements identified by WGS                |

|                             |       |
|-----------------------------|-------|
| Supplementary Methods ..... | 69–79 |
|-----------------------------|-------|

|                 |       |
|-----------------|-------|
| References..... | 80–81 |
|-----------------|-------|

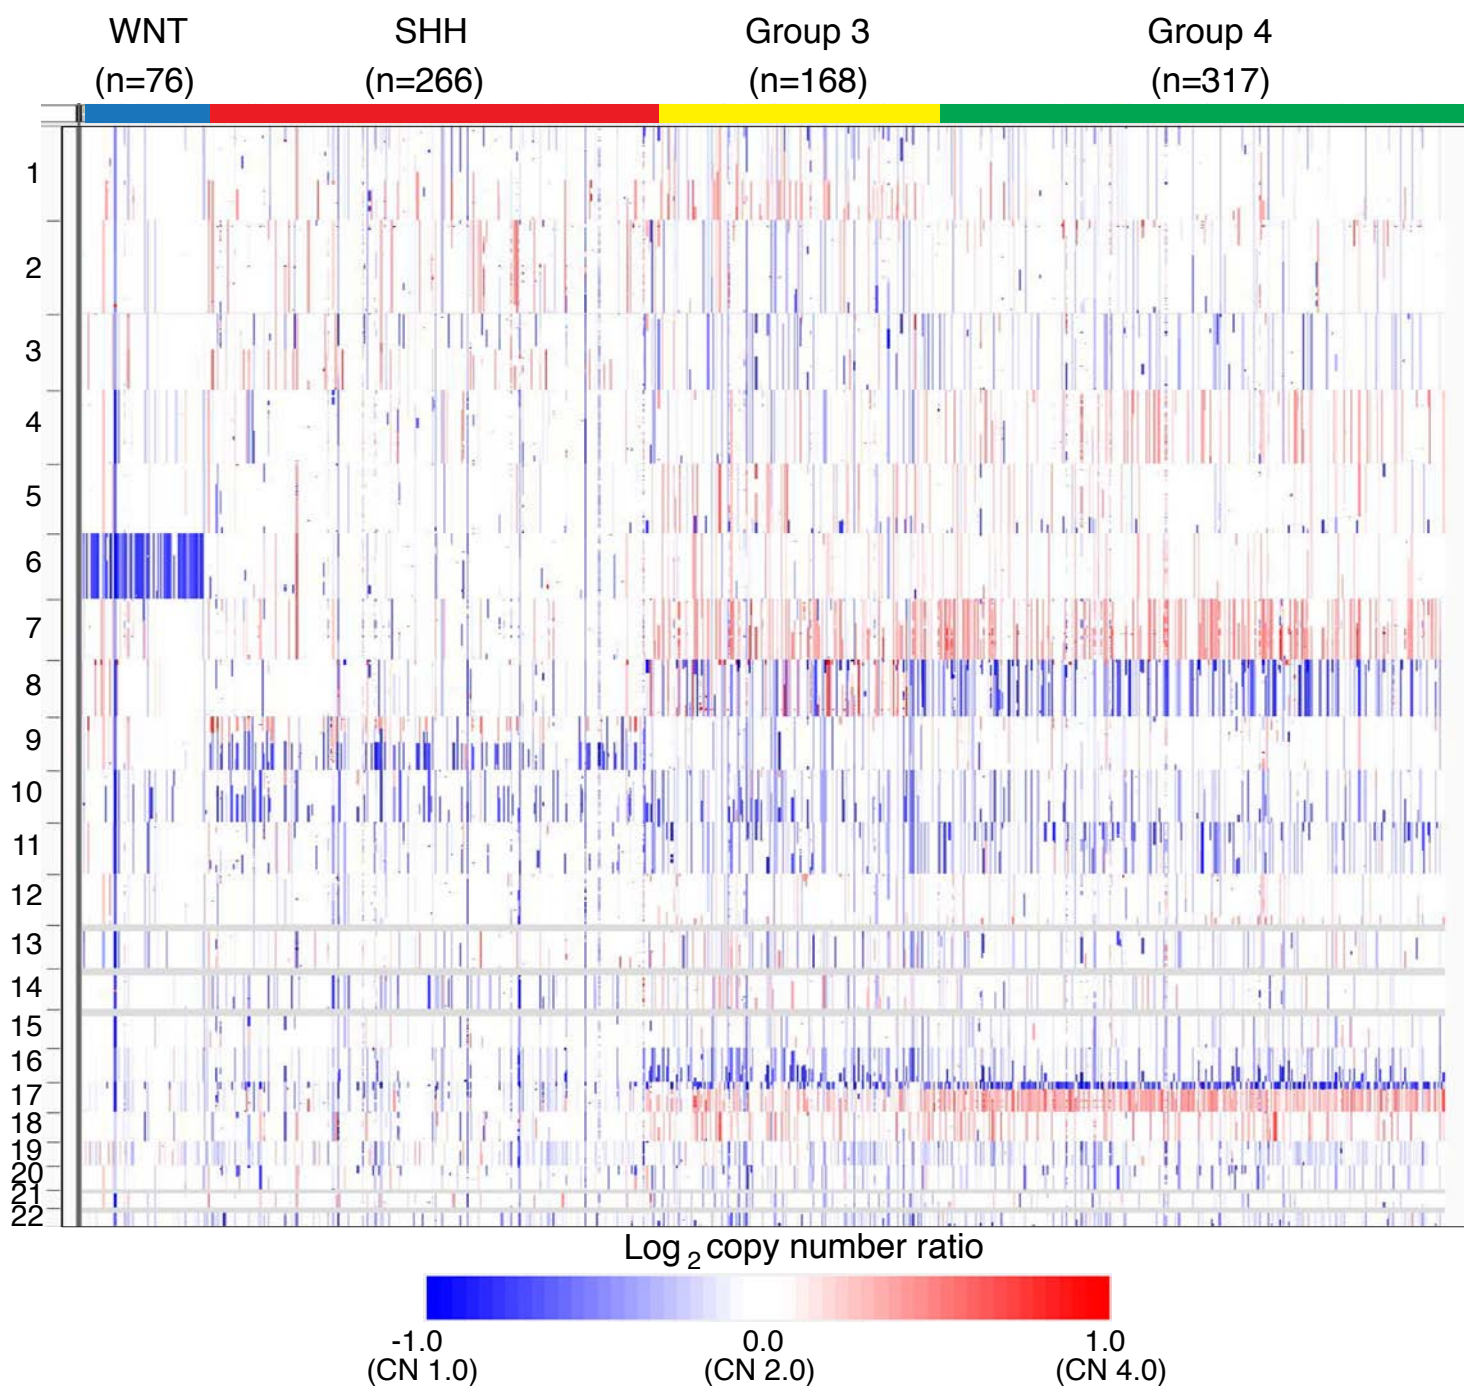

**Supplementary Figure 1. Genome-wide copy number profile of medulloblastoma subgroups.** SNP6 profiling was performed on 1087 non-overlapping primary medulloblastomas. Shown is a copy number heatmap for 827 cases classified according to medulloblastoma subgroup based on matched gene expression data. Amplifications are shown in red and deletions in blue.

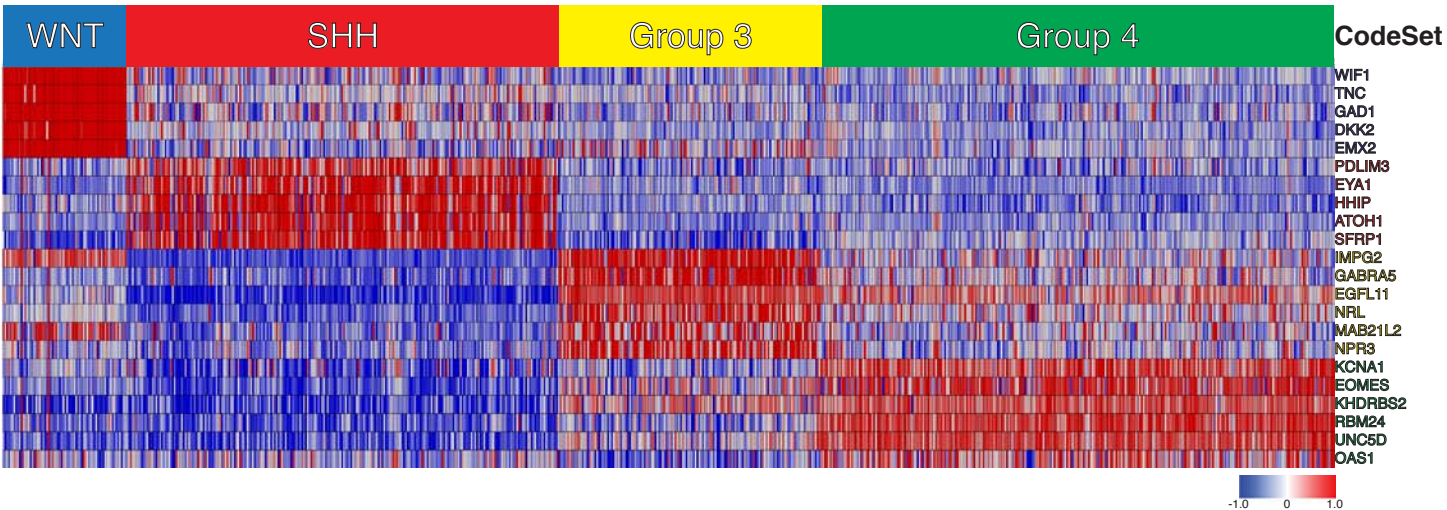

**Supplementary Figure 2. nanoString classification of medulloblastoma.** Heatmap showing the expression level of 22 medulloblastoma signature genes (CodeSet) across 827 cases in the MAGIC cohort as determined by nanoString. Molecular subgroup affiliation was inferred by class prediction and samples have been sorted according to their assigned class.

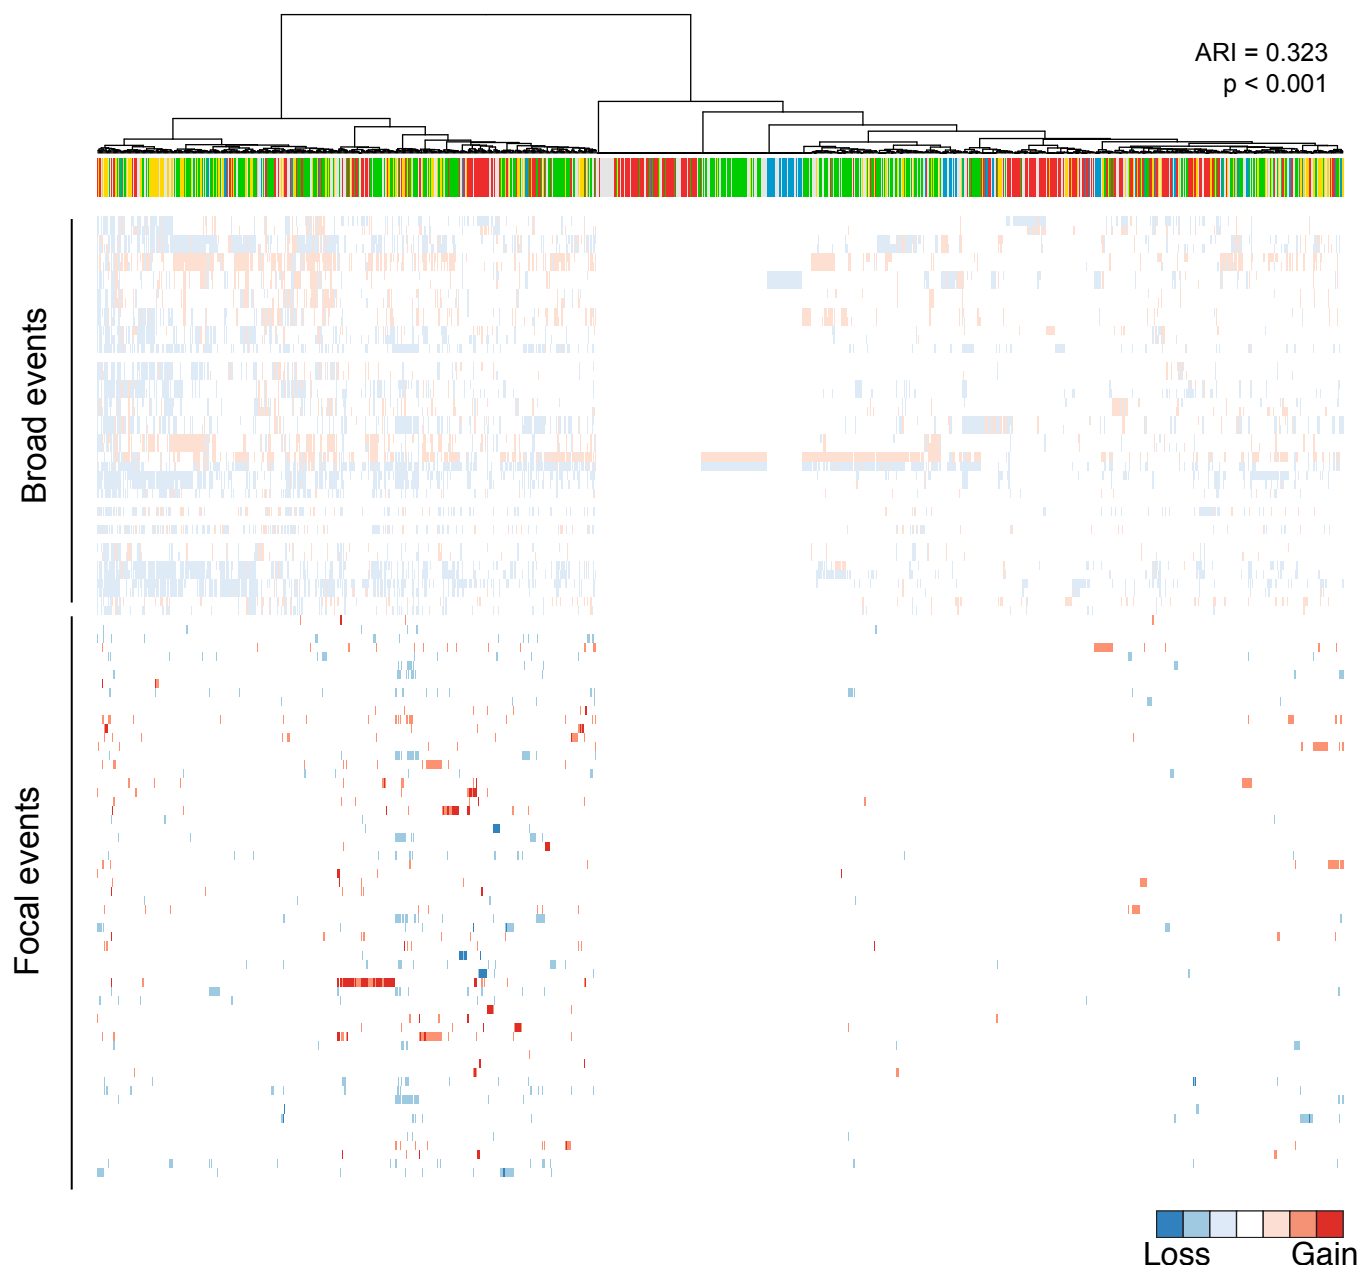

**Supplementary Figure 3. Unsupervised hierarchical clustering of broad and focal SCNAs in medulloblastoma.** Coloured side bar indicates medulloblastoma subgroups (WNT: blue, SHH: red, Group 3: yellow, Group 4: green). Only focal events identified in the pan-cohort GISTIC2 analysis were included in the clustering. Resulting clusters show significant agreement with known medulloblastoma expression subgroups ( $p < 0.001$ , Chi-squared test). ARI, Adjusted Rand Index.

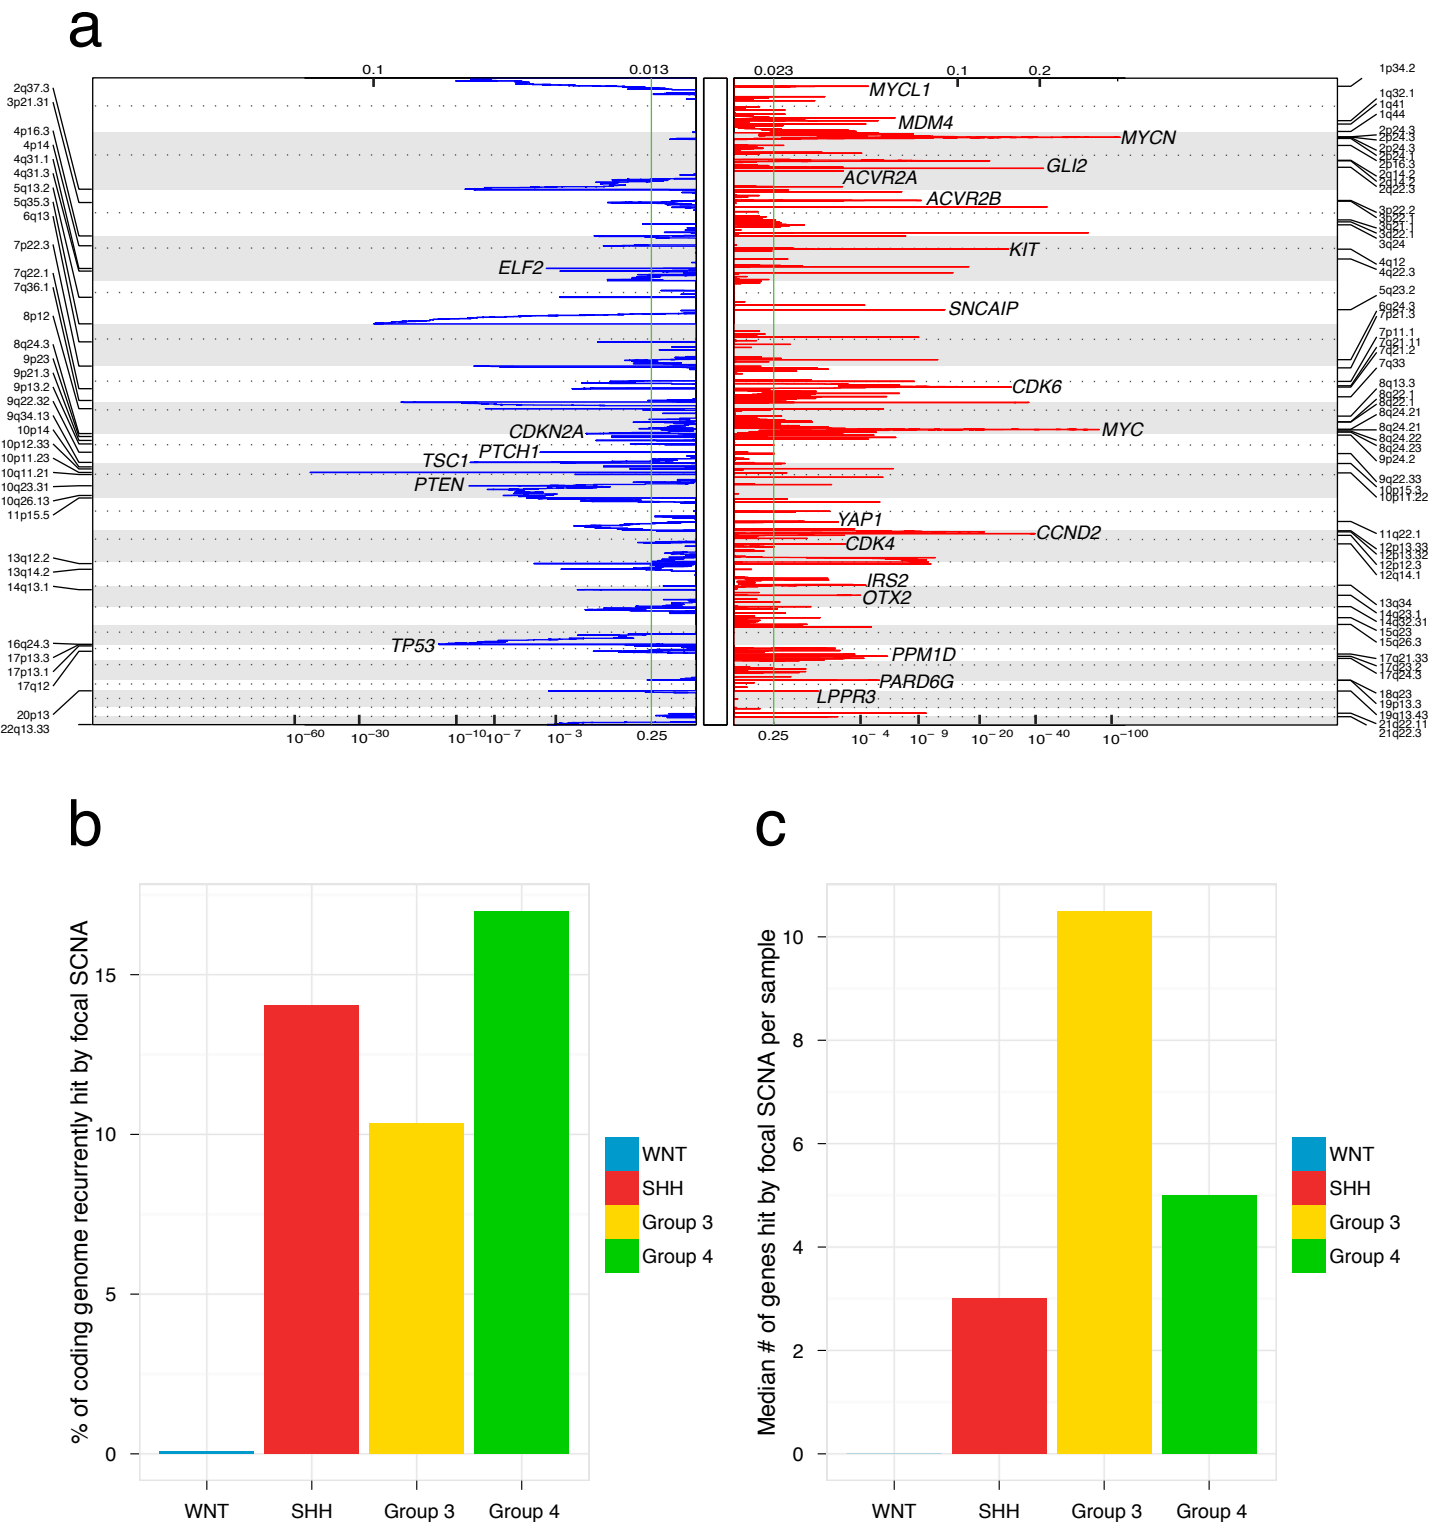

**Supplementary Figure 4. Somatic copy number aberrations in medulloblastoma.** **a**, Segmented copy number profiles for 1087 primary medulloblastomas were analyzed using GISTIC2 to identify significant regions of amplification (depicted in red, right plot) and deletion (depicted in blue, left plot). The most significant peaks of interest have been labeled with the candidate driver gene. **b-c**, Genomic coverage and subgroup distribution of recurrent focal somatic copy number aberrations (SCNAs) in medulloblastoma. Both the percentage of the coding genome (**b**) and the median number of genes (per sample) (**c**) affected by SCNAs in medulloblastoma subgroups are summarized.

Supplementary Figure 5, Northcott, Shih et al

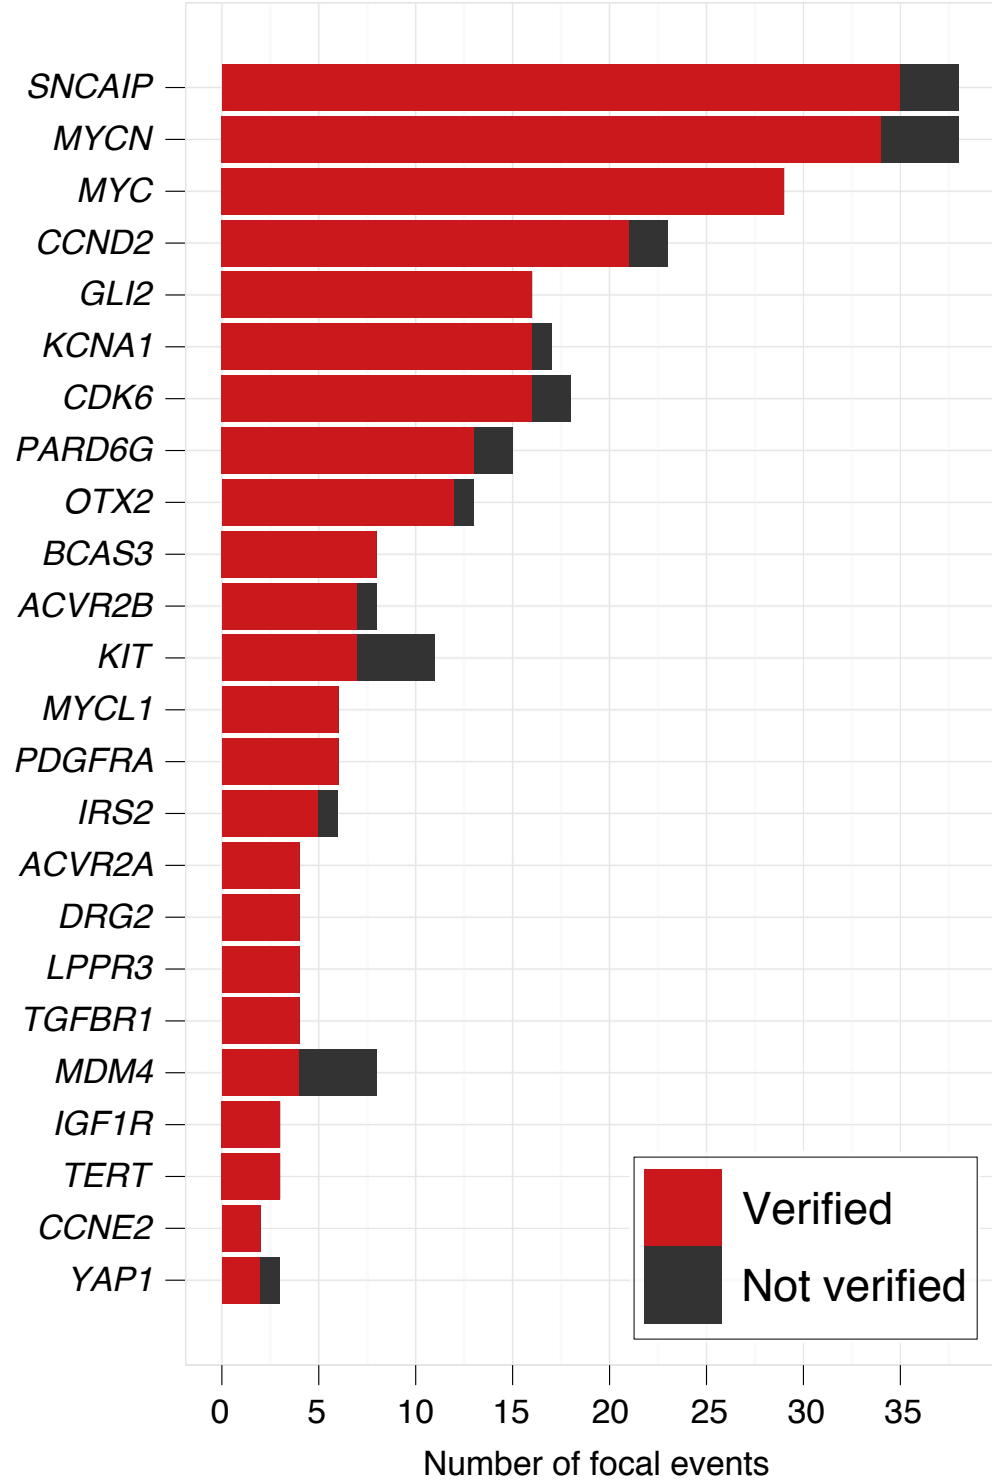

**Supplementary Figure 5. Verification of focal SCNAs by nanoString.** Twenty-four genes inferred to be focally gained/amplified by SNP6 were interrogated using a custom nanoString CodeSet across 192 medulloblastomas selected from our cohort. Bar graph shows the number of samples with a verified SCNA in red versus non-verified in black.

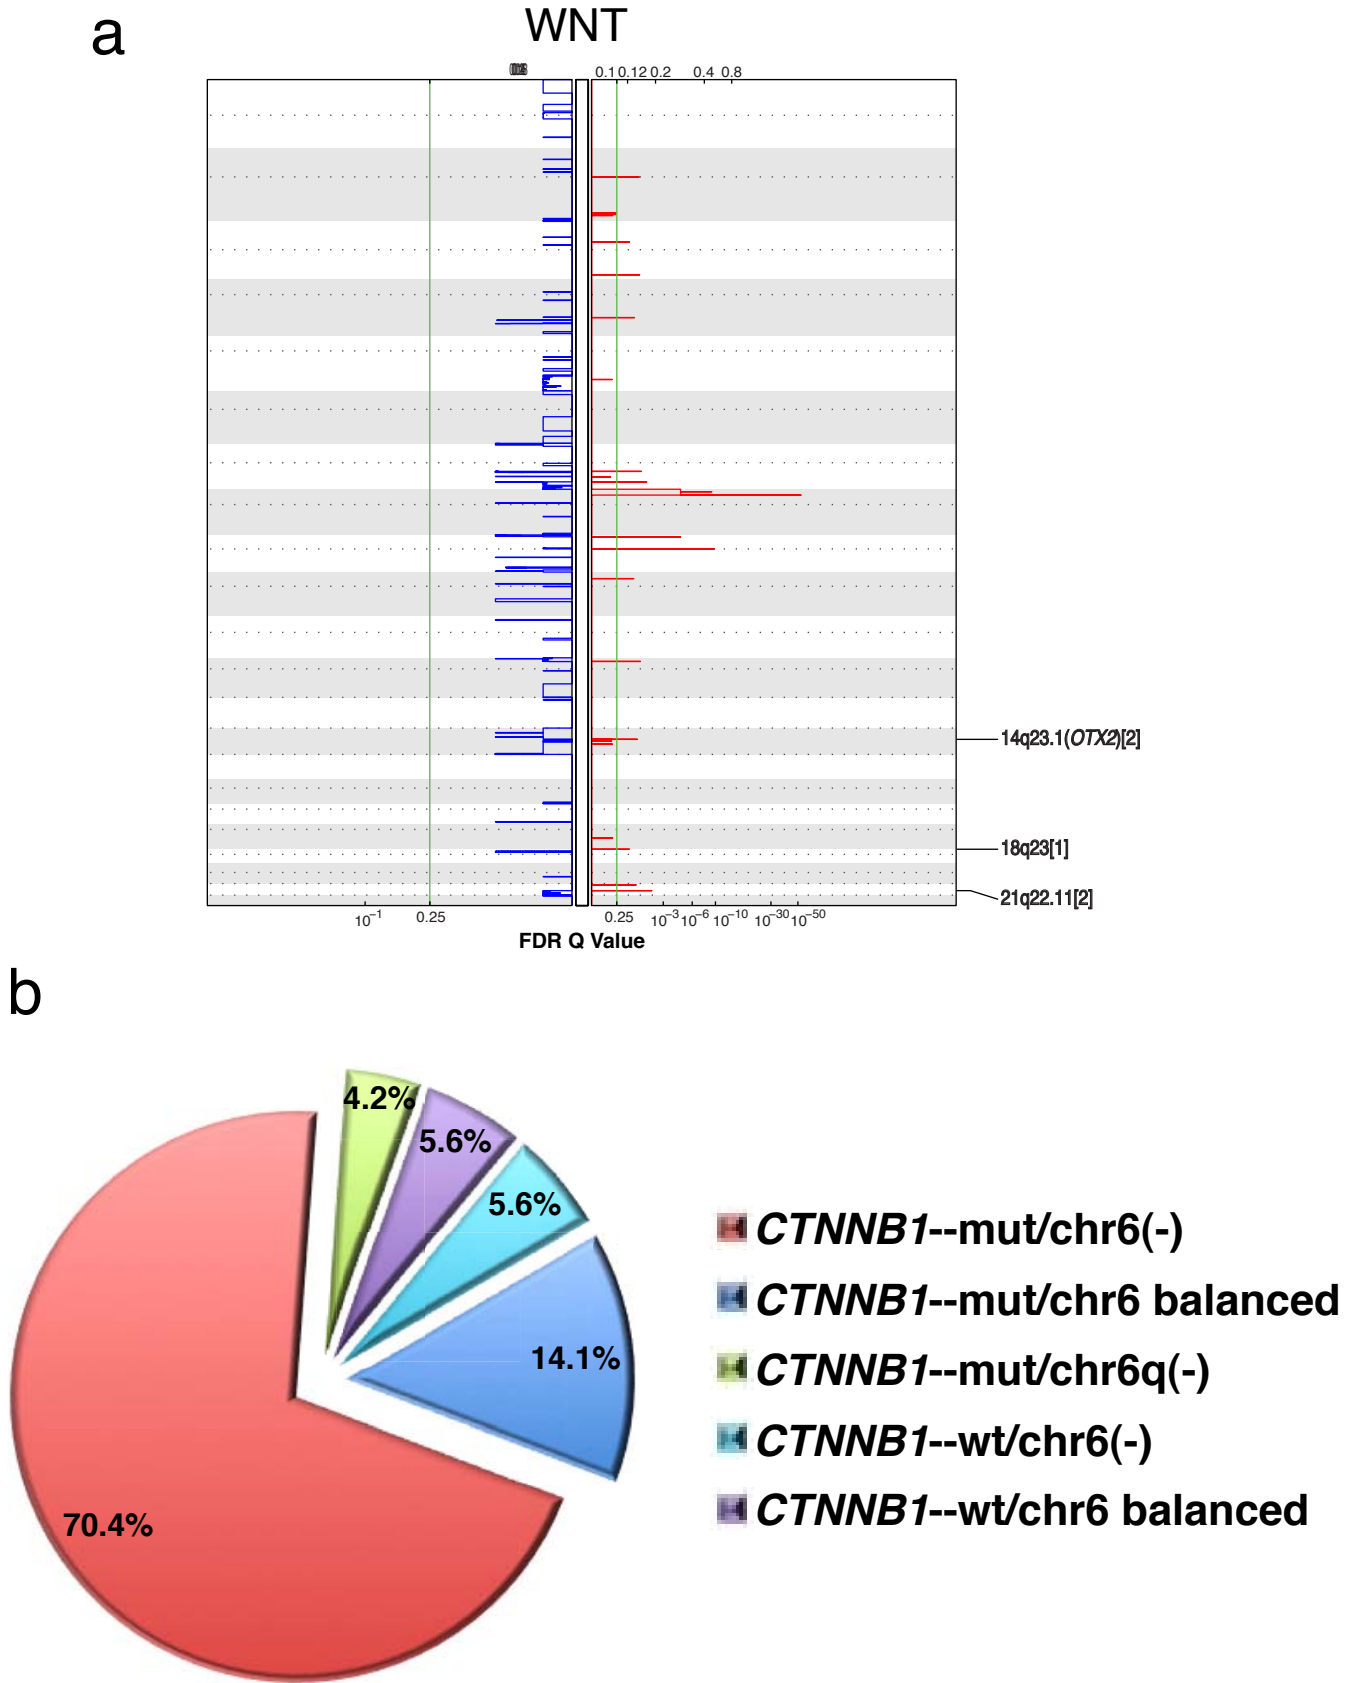

**Supplementary Figure 6. WNT medulloblastoma.** **a**, GISTIC2 analysis of WNT medulloblastoma. Significant regions of amplification (right panel) are labeled. No significant regions of deletion were identified (left panel). **b**, Pie chart showing the distribution of *CTNNB1* mutations and chromosome 6 copy number status among WNT cases.

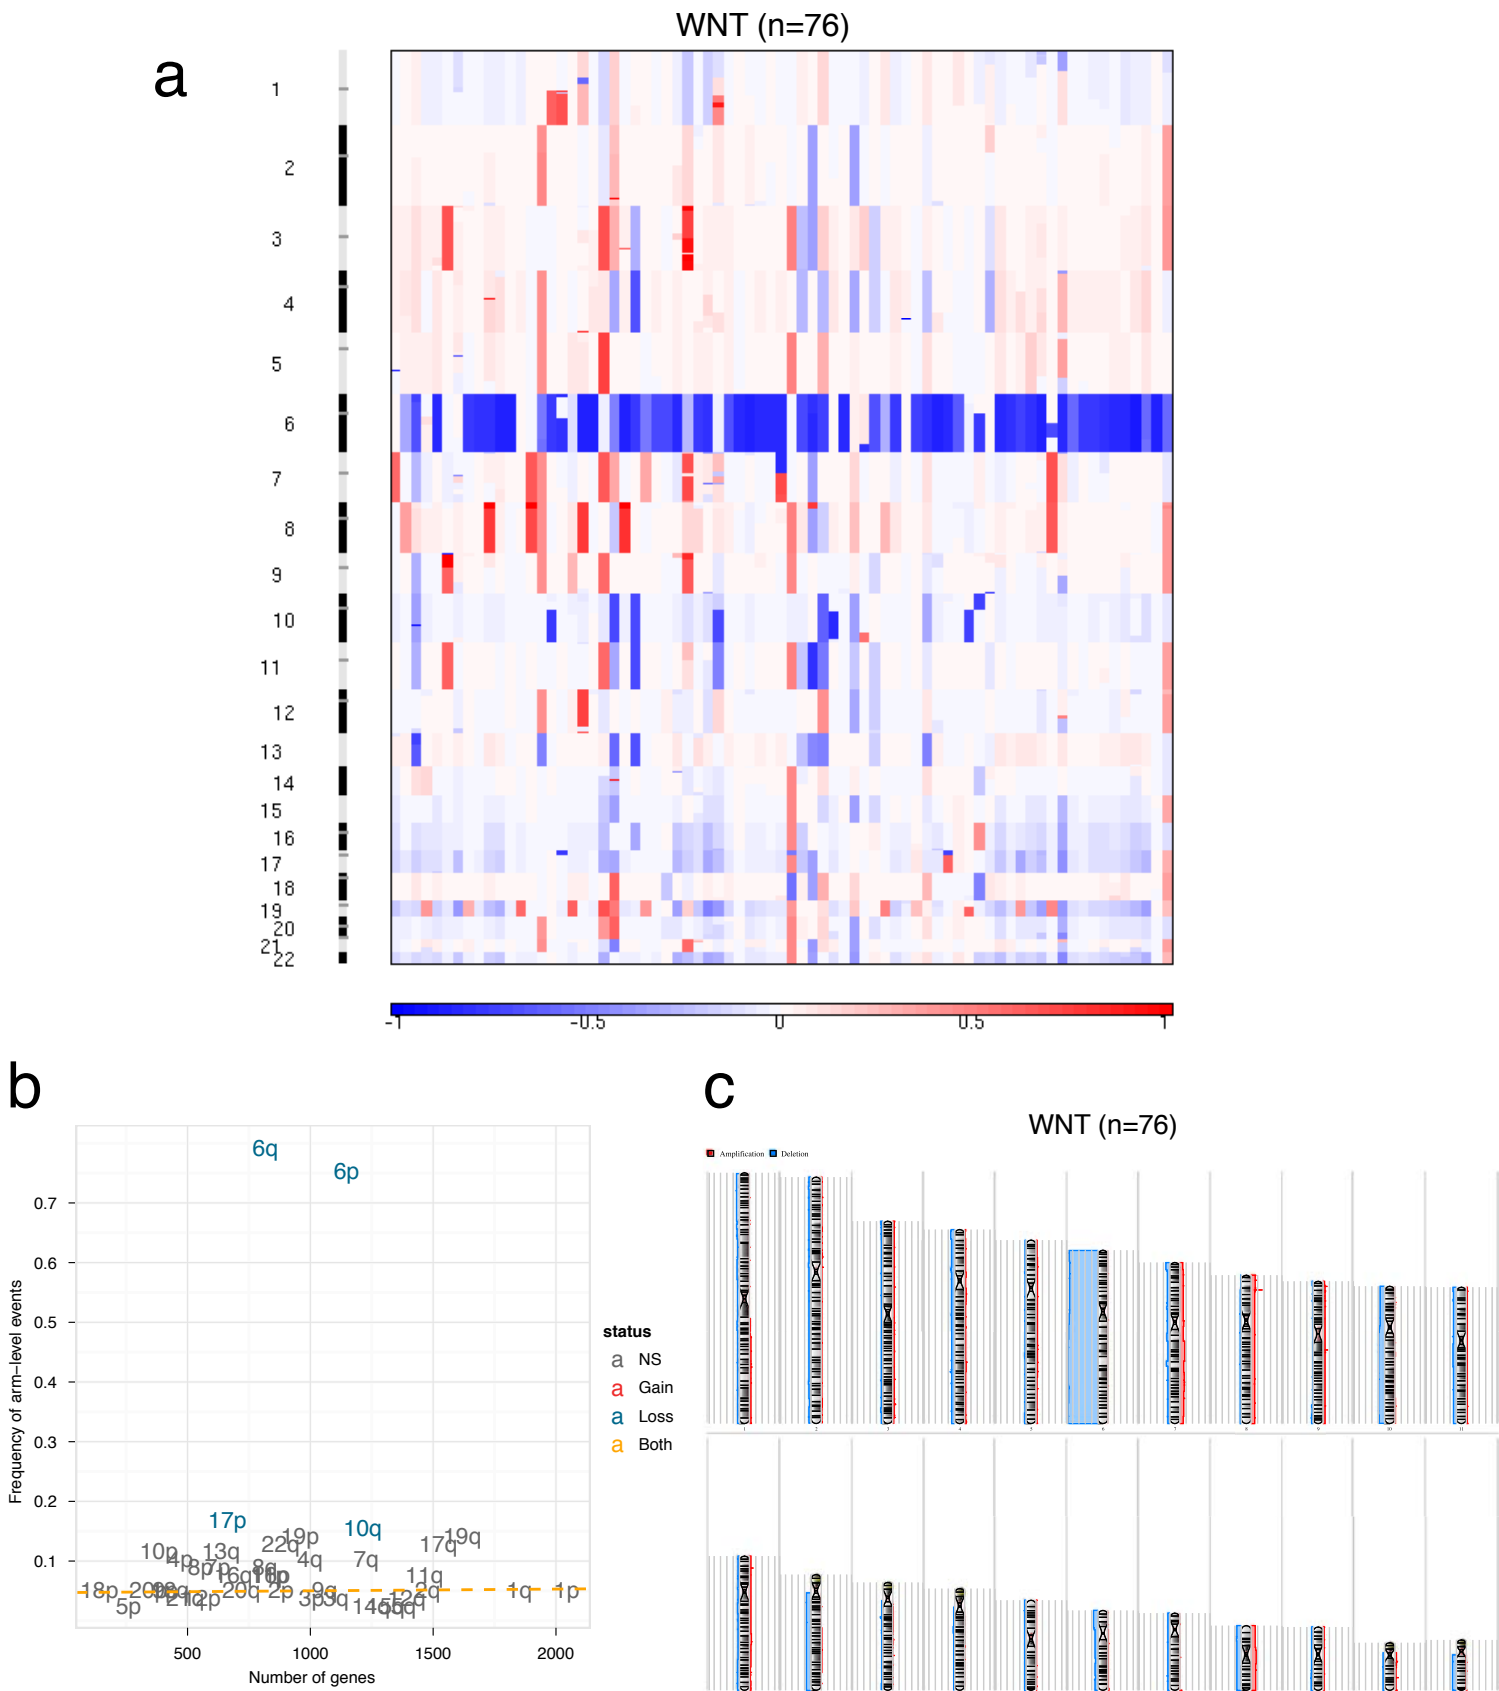

**Supplementary Figure 7. SNP6 copy number profile of WNT medulloblastoma.** **a**, Copy number heatmap for 76 WNT medulloblastomas profiled by SNP6. Amplifications are shown in red, deletions in blue. **b**, Broad cytogenetic events in WNT tumours. Significant chromosome arm-level gains are depicted in red, arm-level losses in blue. **c**, Summary plot of gains and losses in WNT medulloblastoma. Ideogram shows the relative distribution of broad gains (red) and losses (blue) across the 22 autosomes. Output from Partek Genomics Suite.

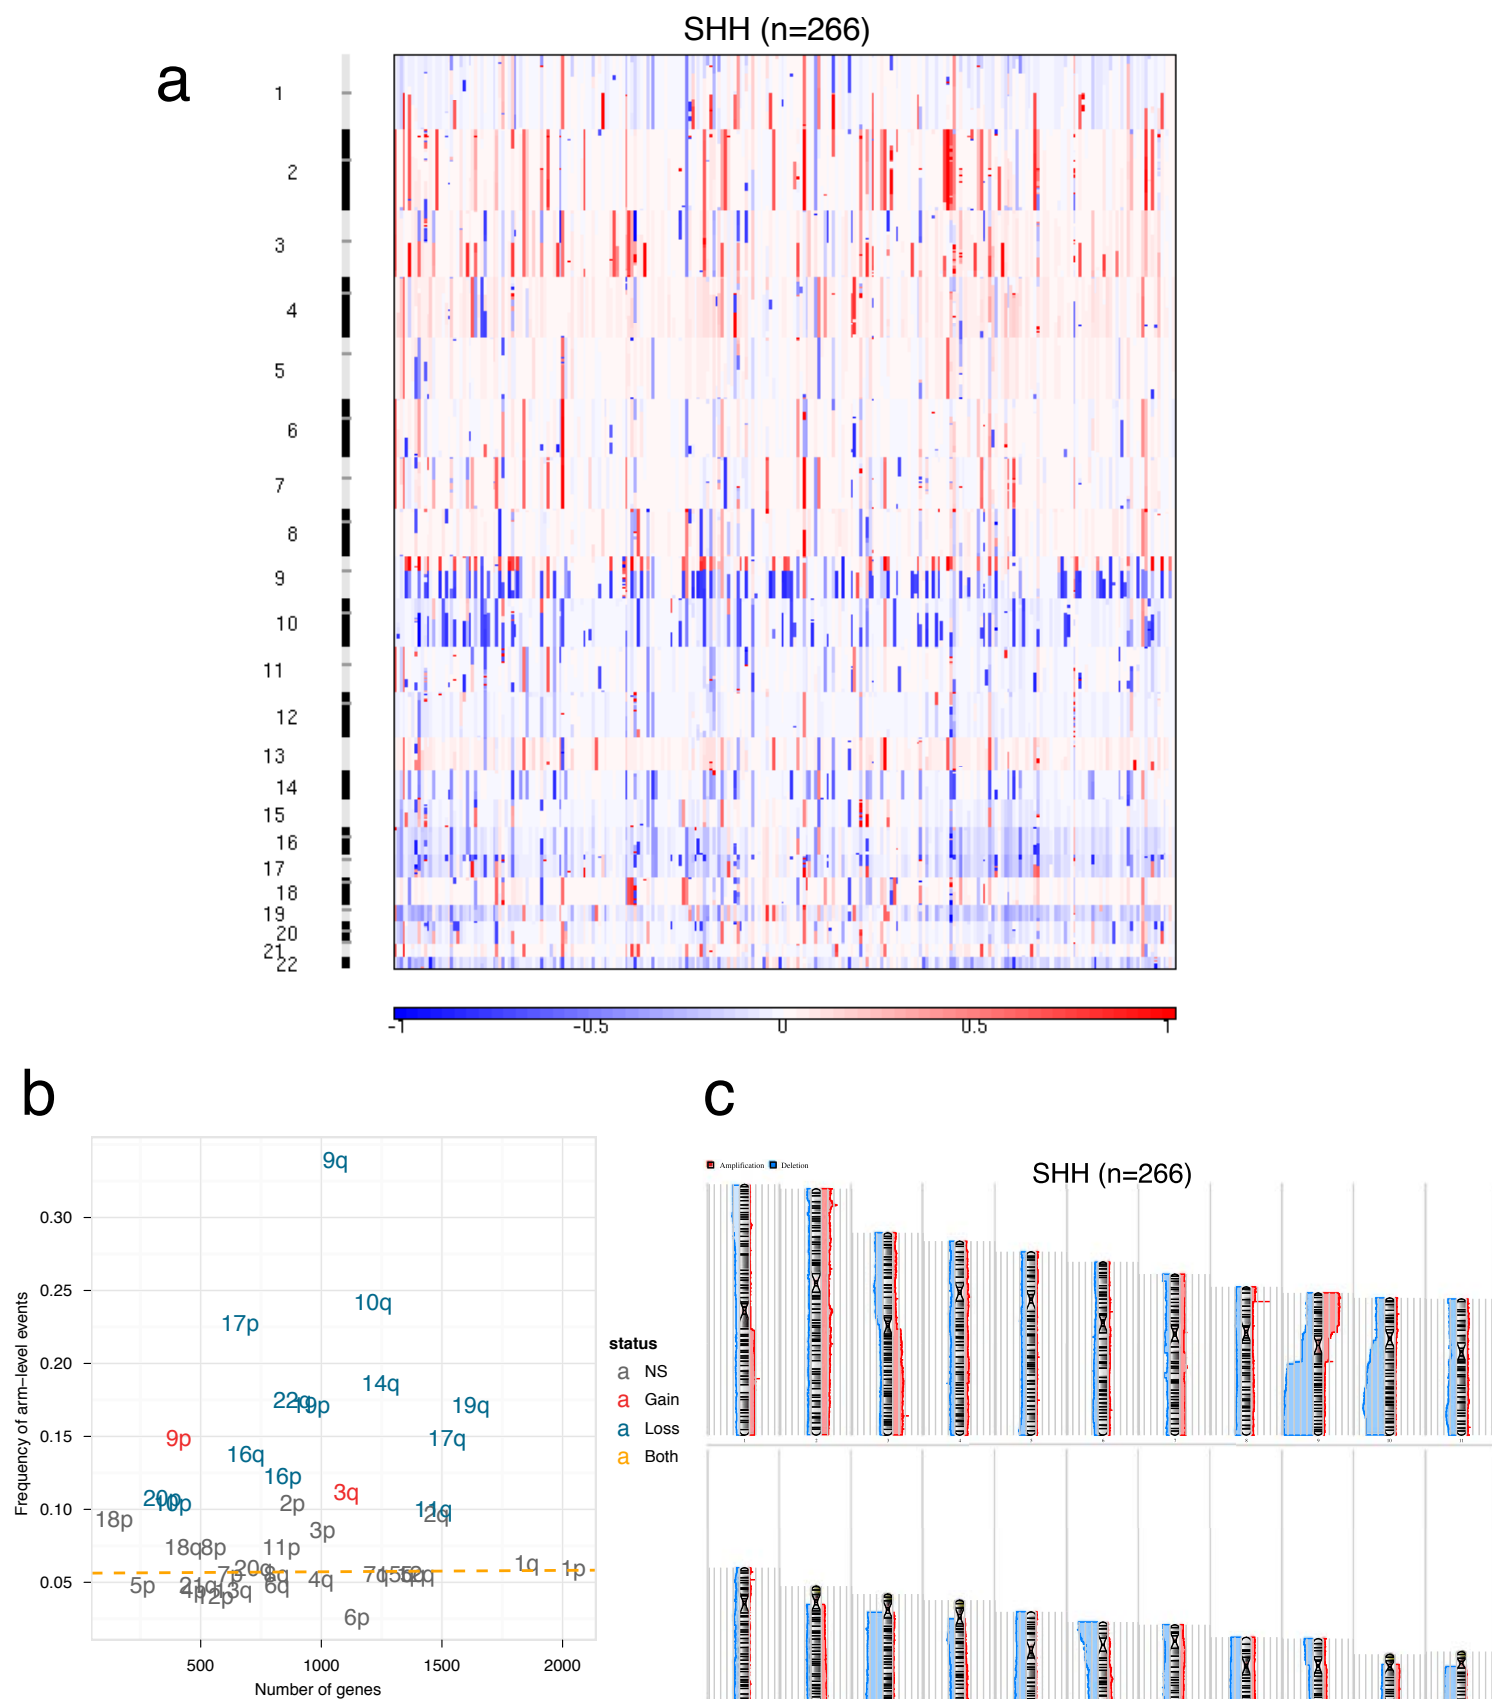

**Supplementary Figure 8. SNP6 copy number profile of SHH medulloblastoma.** **a**, Copy number heatmap for 266 SHH medulloblastomas profiled by SNP6. Amplifications are shown in red, deletions in blue. **b**, Broad cytogenetic events in SHH tumours. Significant chromosome arm-level gains are depicted in red, arm-level losses in blue. **c**, Summary plot of gains and losses in SHH medulloblastoma. Ideogram shows the relative distribution of broad gains (red) and losses (blue) across the 22 autosomes. Output from Partek Genomics Suite.

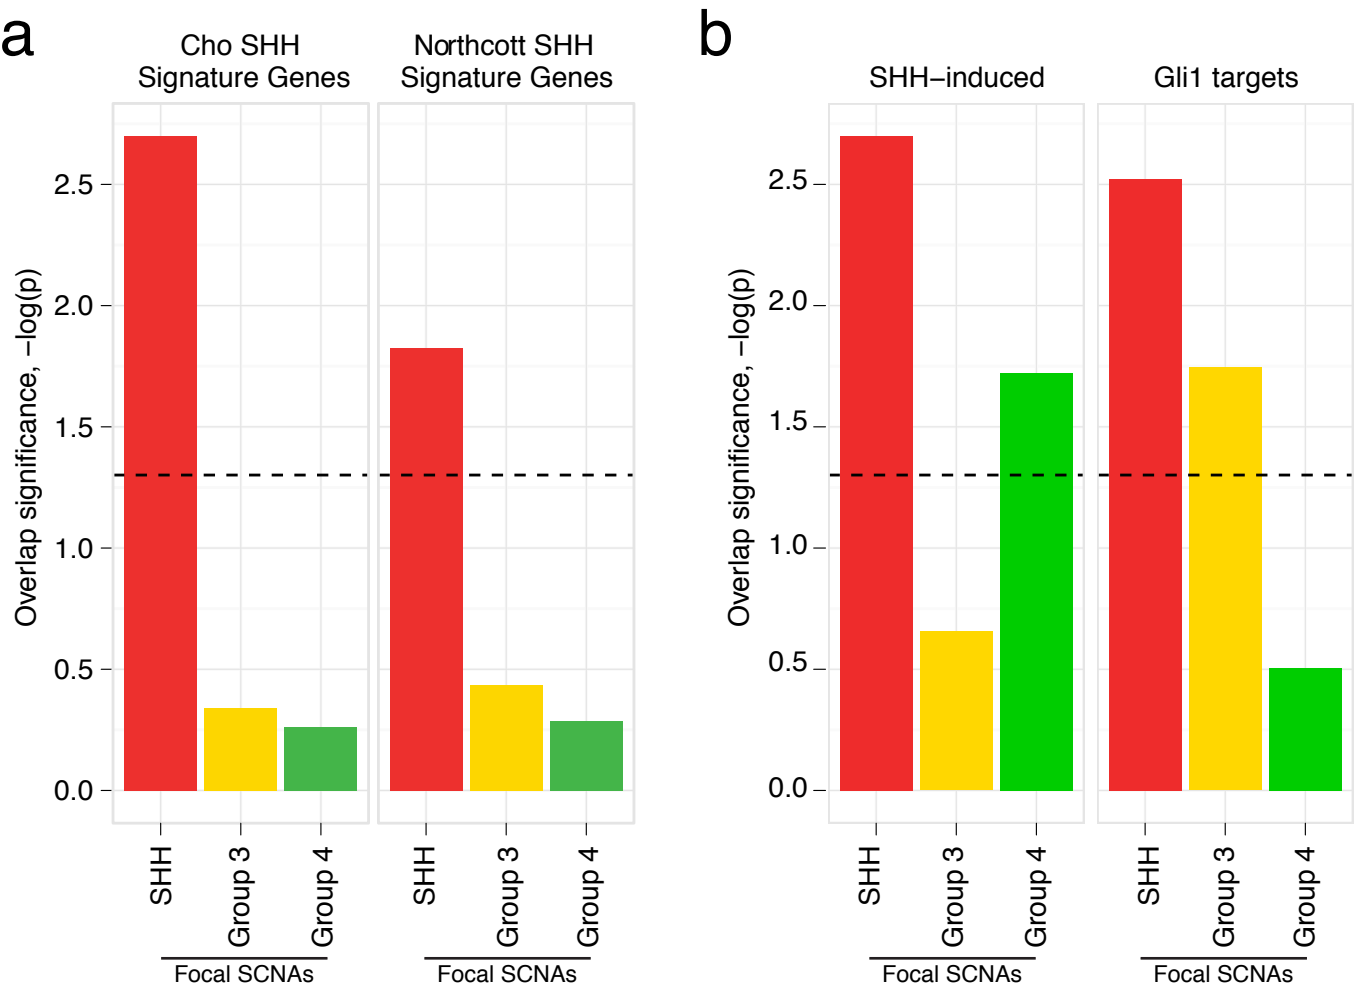

**Supplementary Figure 9. Significant overlap between SHH amplification genes and targets of SHH signaling.** **a**, Bar graph shows the overlap significance based on permutation tests between SHH signature genes reported in the Cho (left plot) and Northcott (right plot) studies and genes mapping to focal SCNAs in our dataset. Dashed line indicates significance threshold ( $P=0.05$ ). **b**, Bar graph of overlap significance between genes focally amplified/gained in medulloblastoma subgroups and genes transcriptionally induced by SHH in cerebellar granule neuron progenitors (CGNPs, left plot) and/or genes targeted by the Gli1 transcription factor (right plot), also in CGNPs.

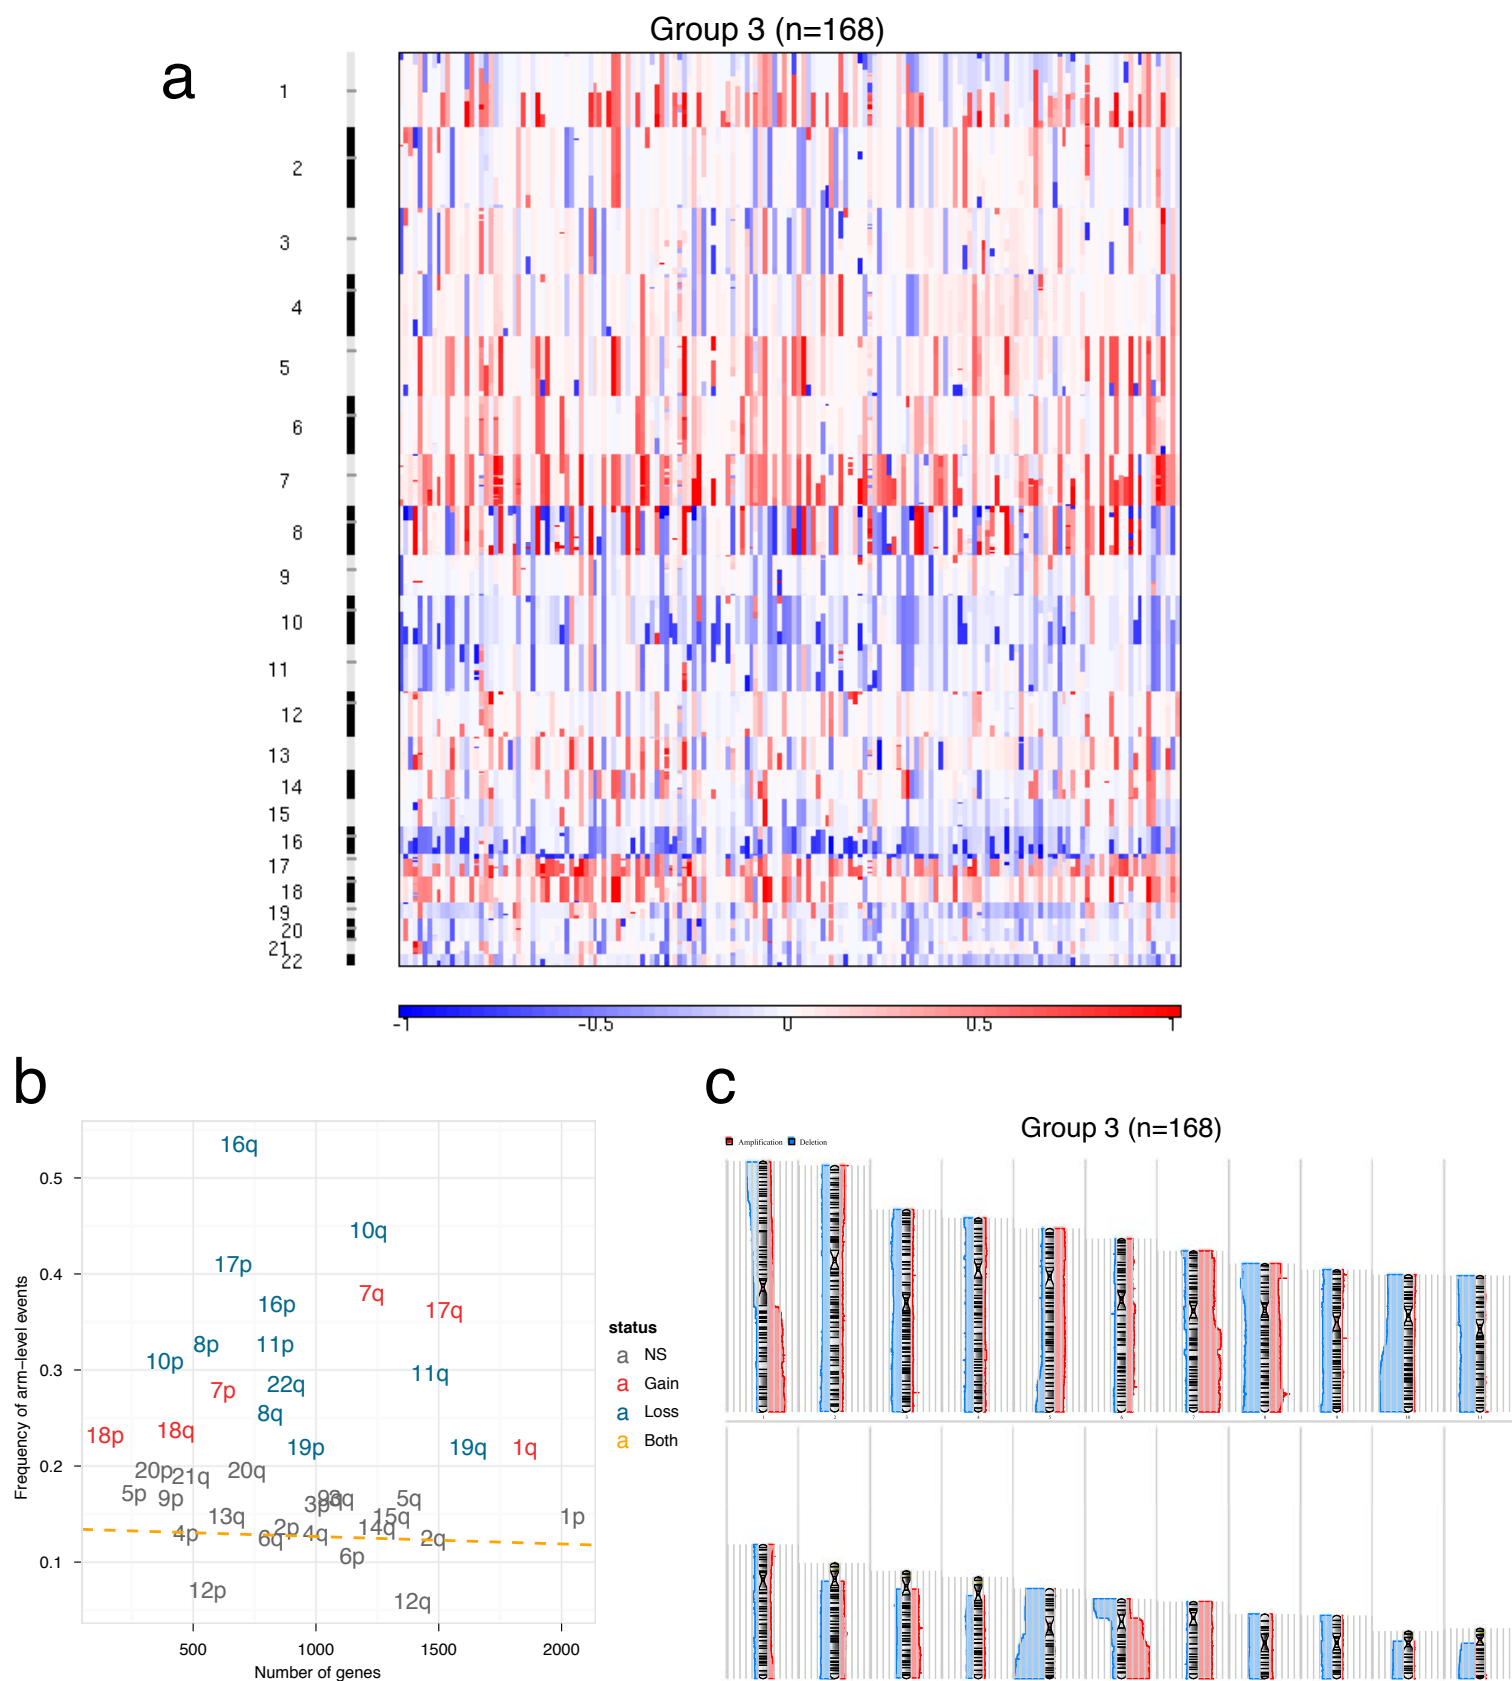

**Supplementary Figure 10. SNP6 copy number profile of Group 3 medulloblastoma.** **a**, Copy number heatmap for 168 Group 3 medulloblastomas profiled by SNP6. Amplifications are shown in red, deletions in blue. **b**, Broad cytogenetic events in Group 3 tumours. Significant chromosome arm-level gains are depicted in red, arm-level losses in blue. **c**, Summary plot of gains and losses in Group 3 medulloblastoma. Ideogram shows the relative distribution of broad gains (red) and losses (blue) across the 22 autosomes. Output from Partek Genomics Suite.

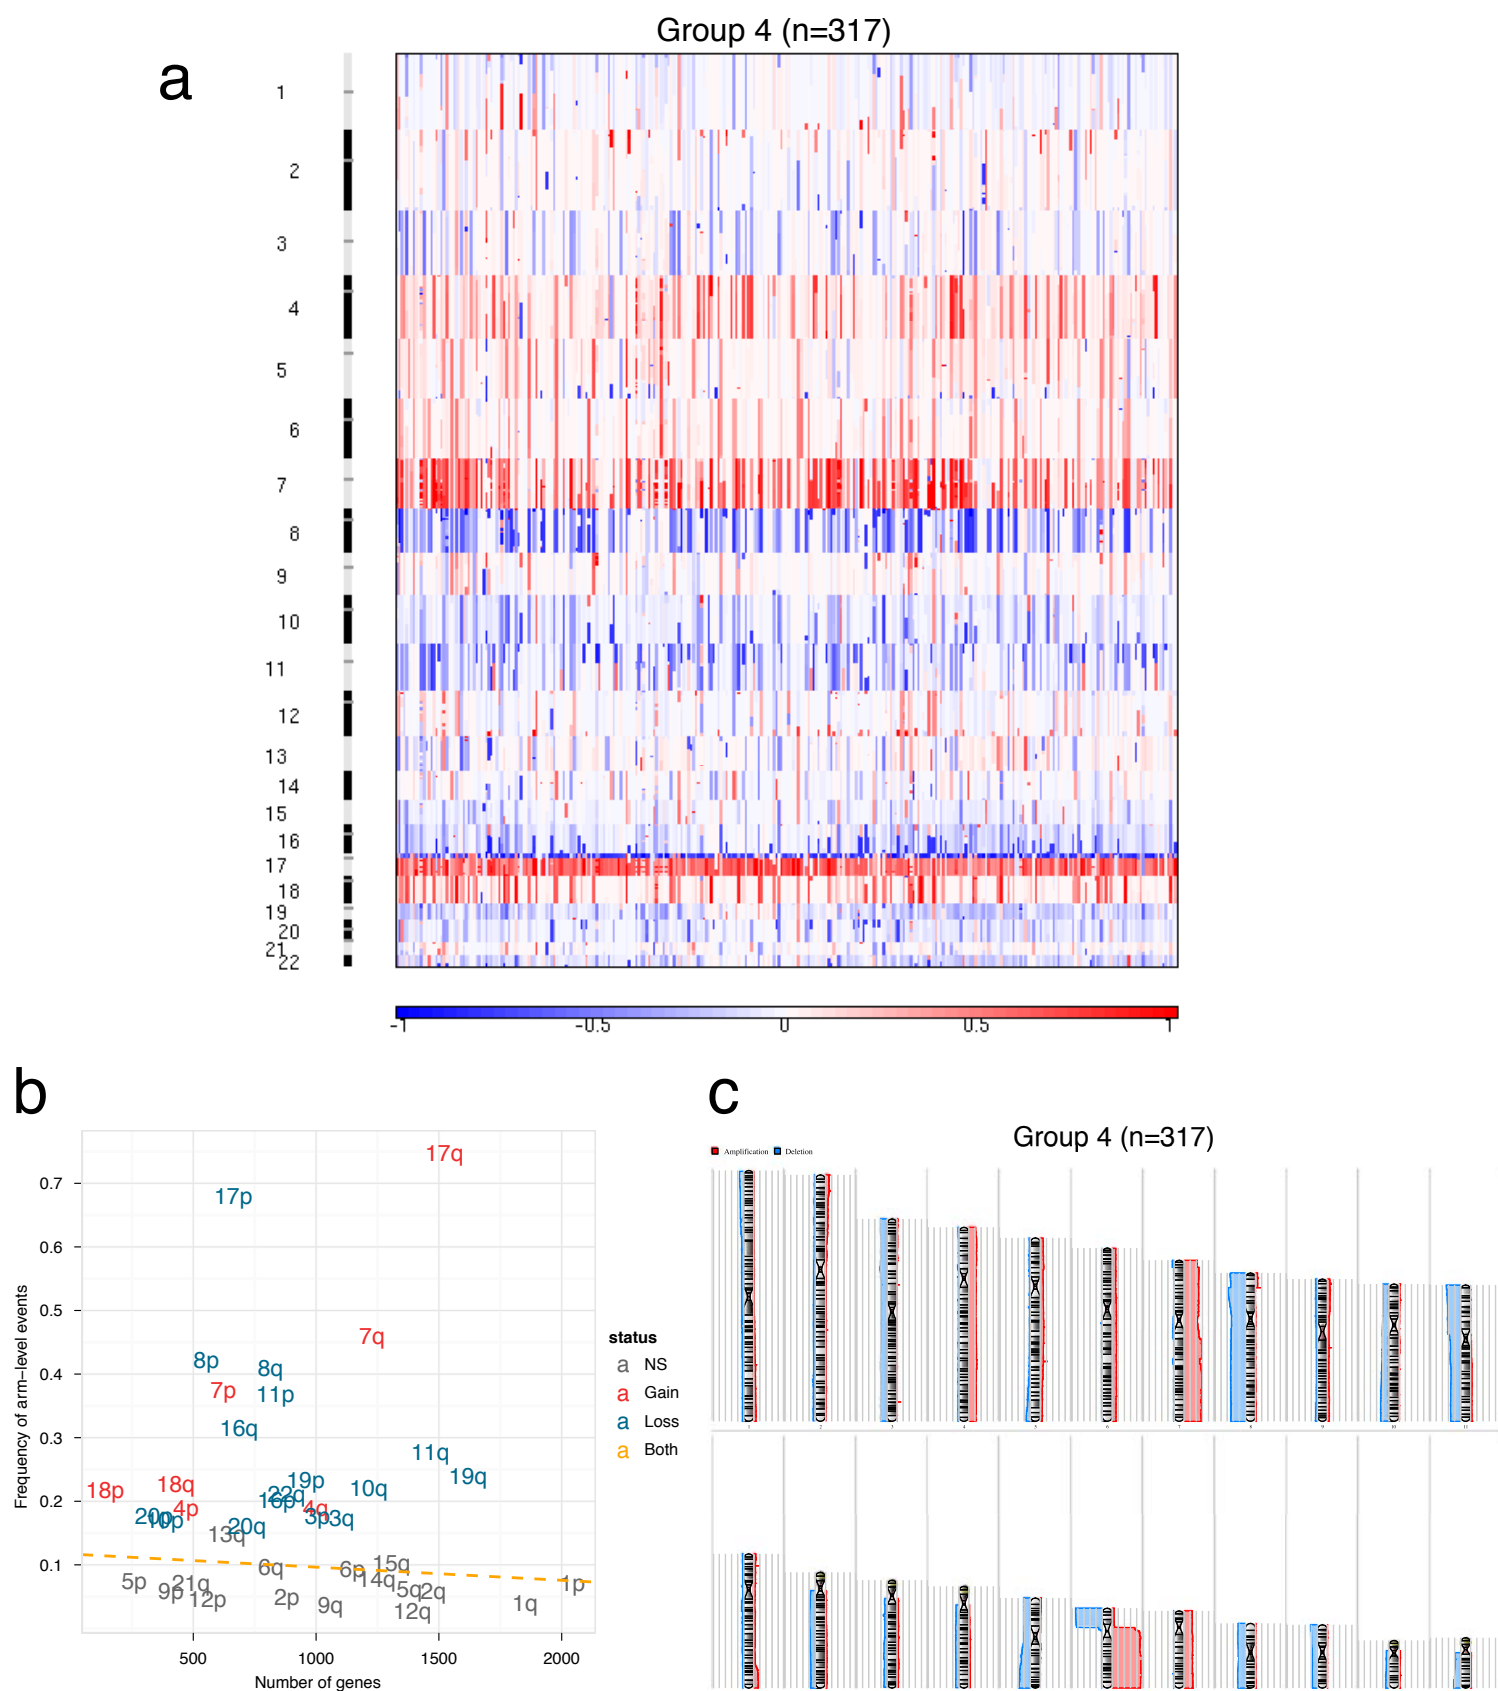

**Supplementary Figure 11. SNP6 copy number profile of Group 4 medulloblastoma.** **a**, Copy number heatmap for 317 Group 4 medulloblastomas profiled by SNP6. Amplifications are shown in red, deletions in blue. **b**, Broad cytogenetic events in Group 4 tumours. Significant chromosome arm-level gains are depicted in red, arm-level losses in blue. **c**, Summary plot of gains and losses in Group 4 medulloblastoma. Ideogram shows the relative distribution of broad gains (red) and losses (blue) across the 22 autosomes. Output from Partek Genomics Suite.

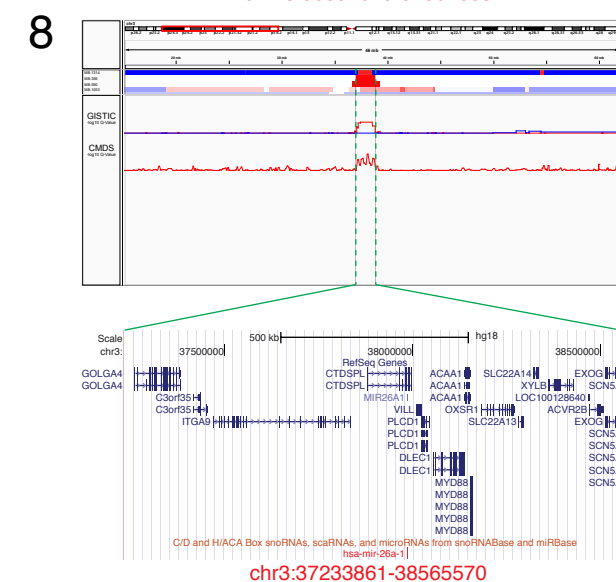

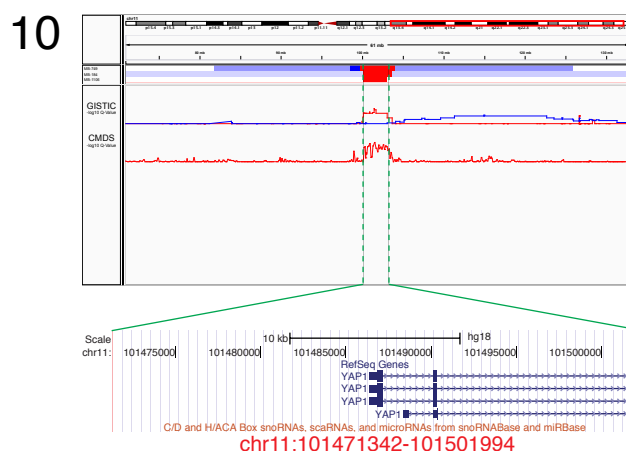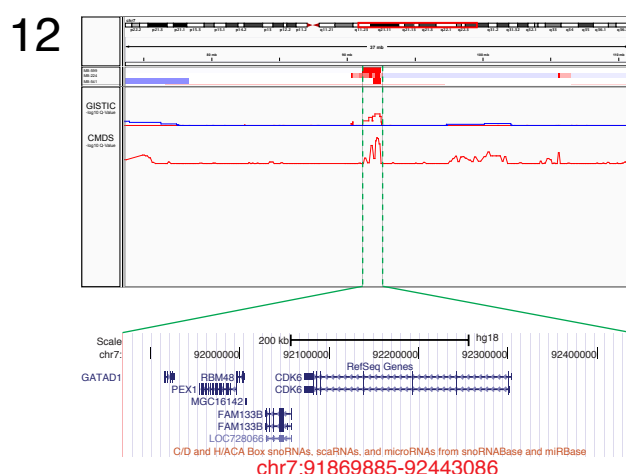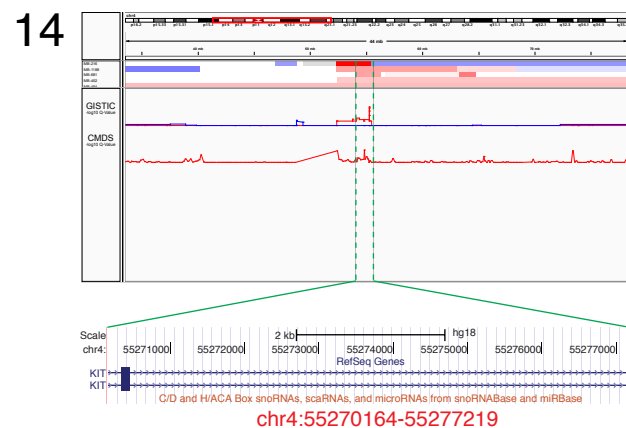

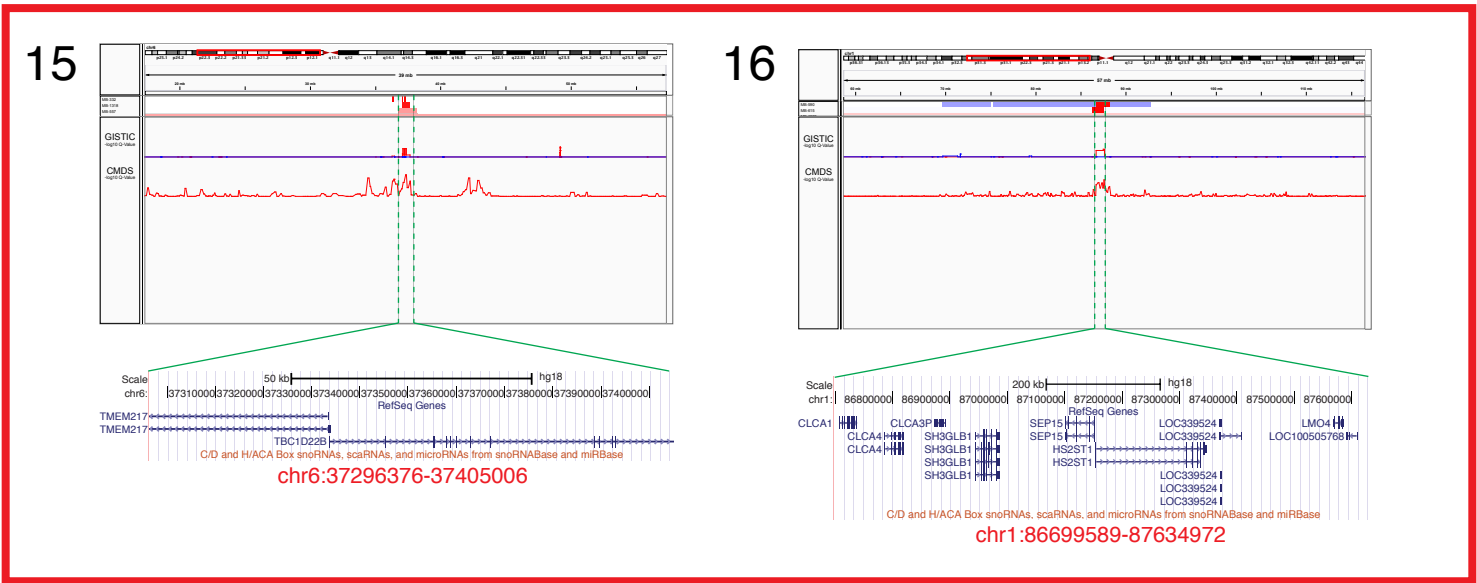

**Supplementary Figure 12. Highly significant regions of focal amplification in SHH medulloblastoma.** SNP6 copy number output for the top regions of focal amplification identified in SHH as determined by GISTIC2 analysis. Segmented copy number data is shown for SHH samples harboring amplification/gain in the regions of interest. Significance values ( $-\log_{10}$  q-value) from GISTIC2 and CMDS analysis are included below the copy number profiles. Output is from the Integrative Genomics Viewer (IGV). UCSC RefSeq genes mapping to each significant region are shown below the IGV output. Regions have been sorted according to significance beginning with the most significant.

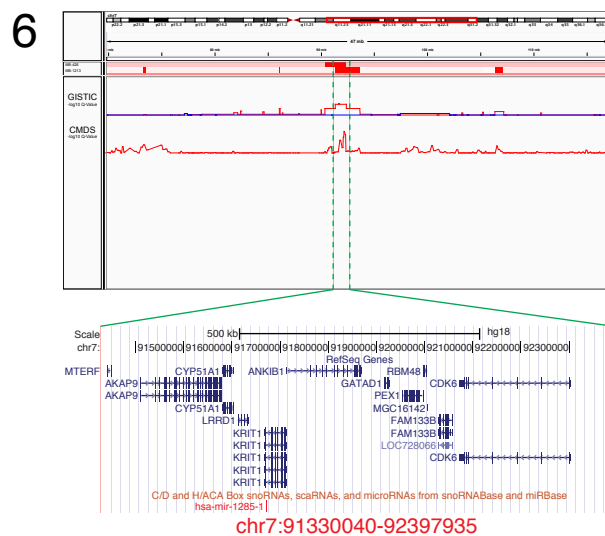

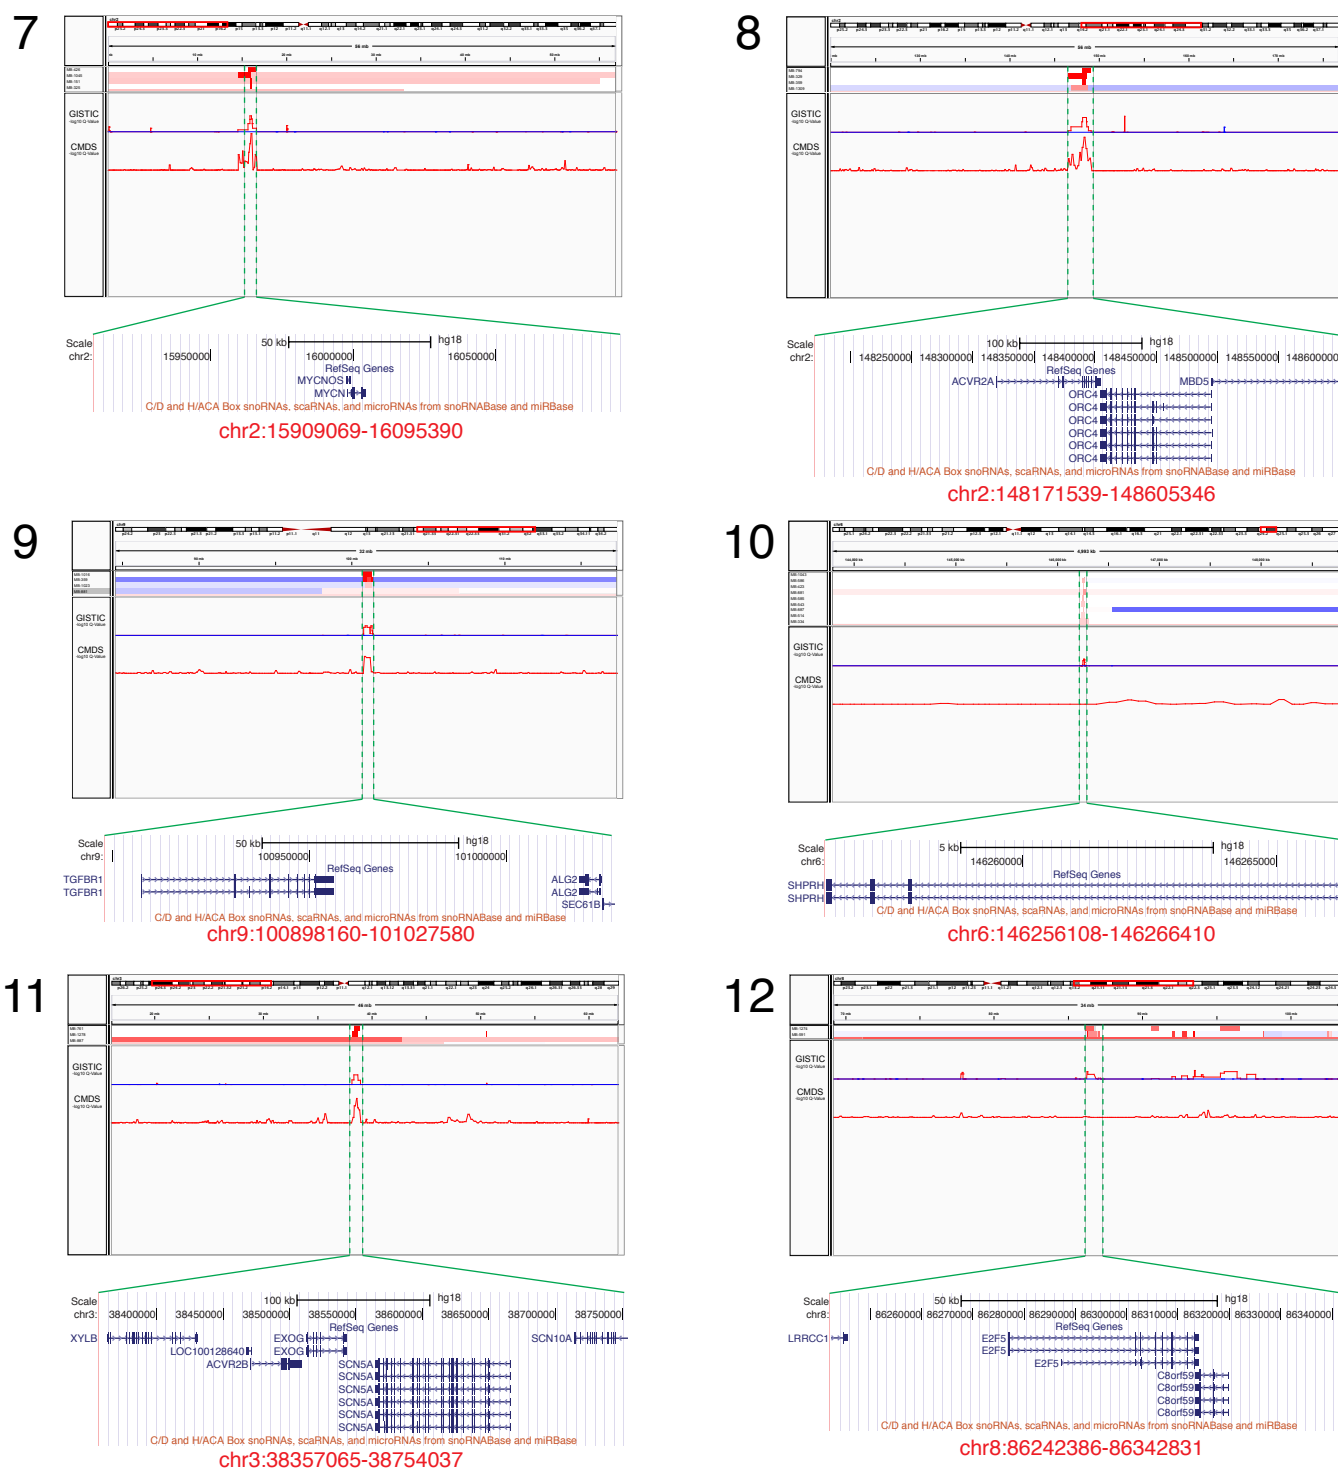

**Supplementary Figure 13. Highly significant regions of focal amplification in Group 3 medulloblastoma.** SNP6 copy number output for the top regions of focal amplification identified in Group 3 as determined by GISTIC2 analysis. Segmented copy number data is shown for Group 3 samples harboring amplification/gain in the regions of interest. Significance values ( $-\log_{10}$  q-value) from GISTIC2 and CMD5 analysis are included below the copy number profiles. Output is from the Integrative Genomics Viewer (IGV). UCSC RefSeq genes mapping to each significant region are shown below the IGV output. Regions have been sorted according to significance beginning with the most significant.

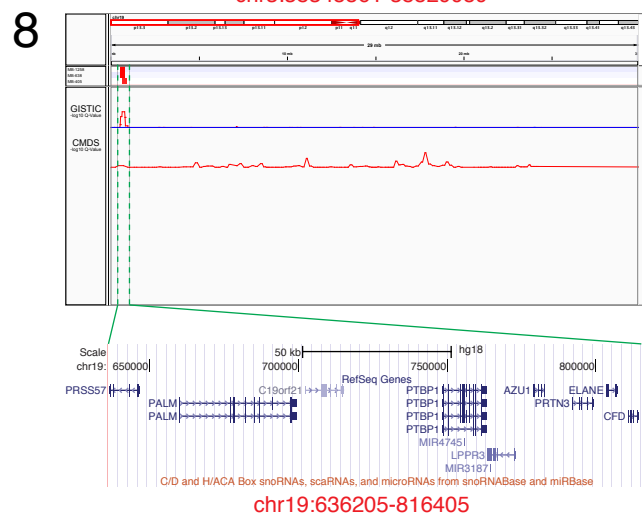

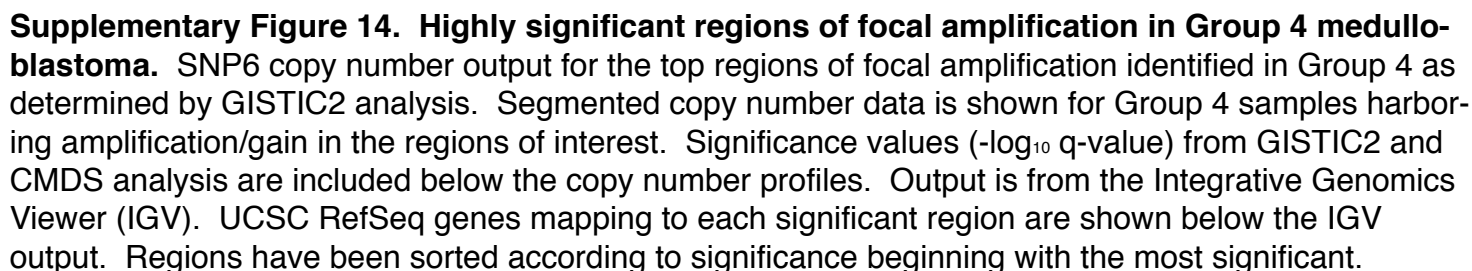

SHH Amplified Regions: Part A

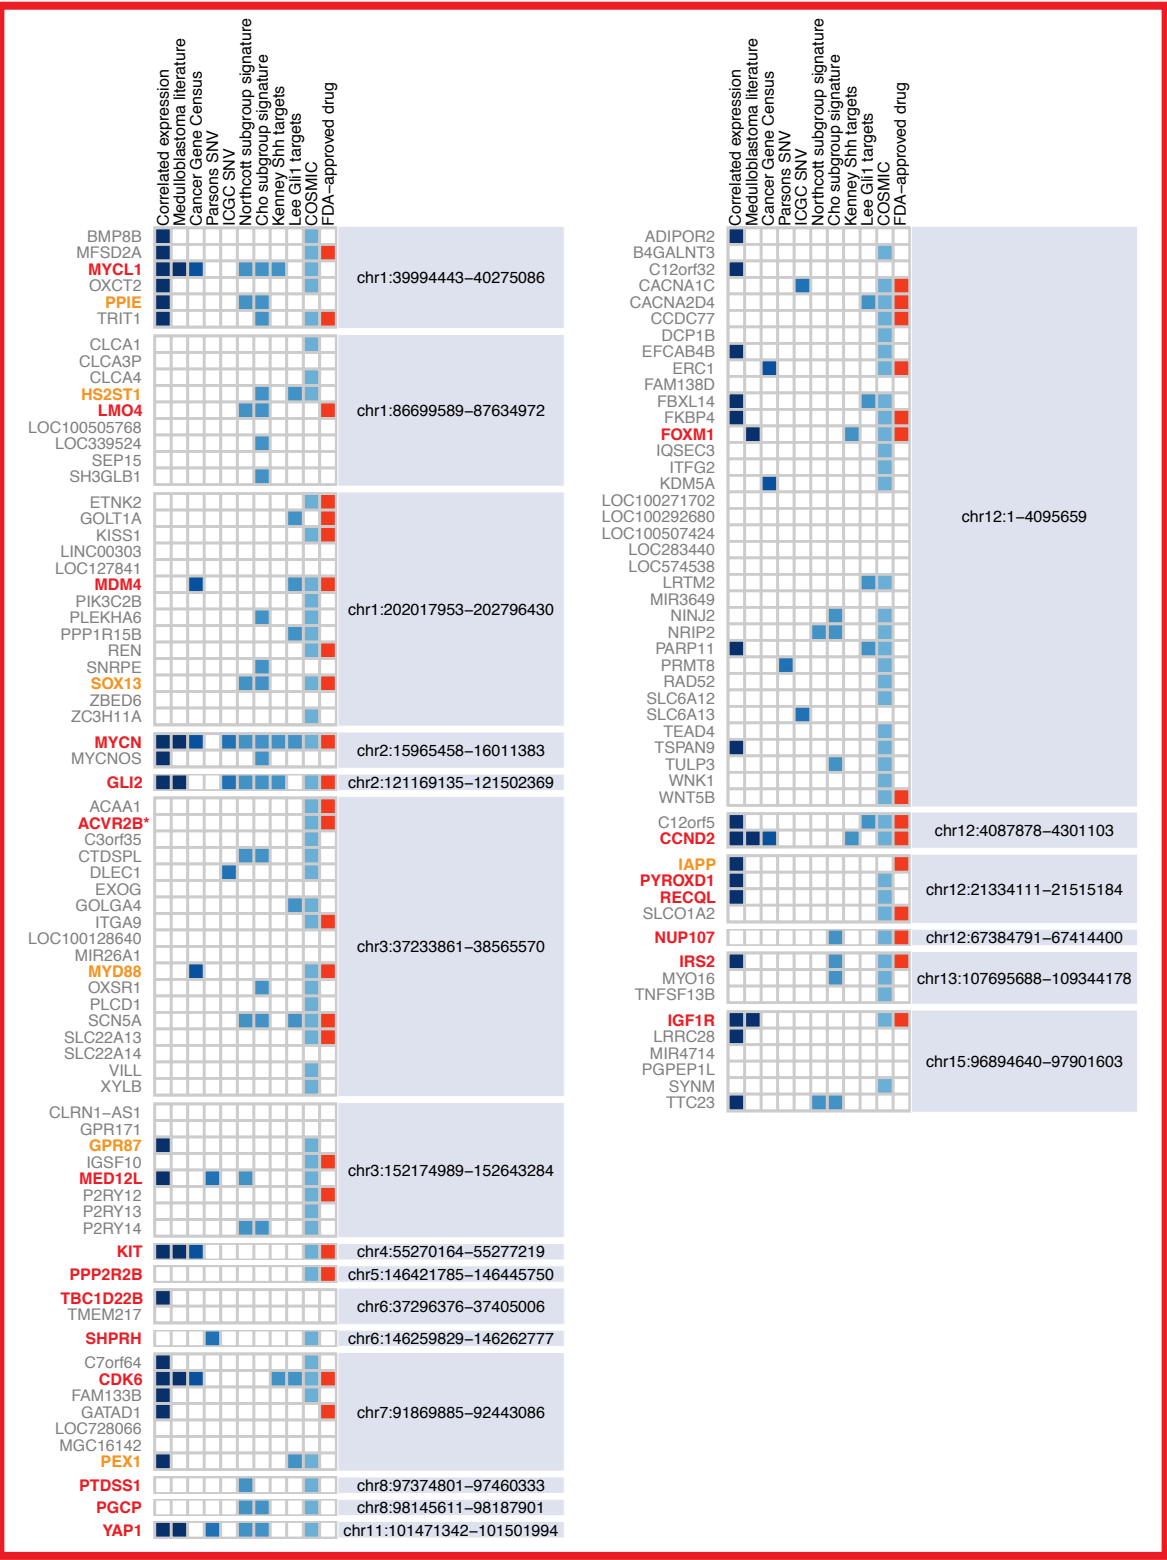

SHH Amplified Regions: Part B

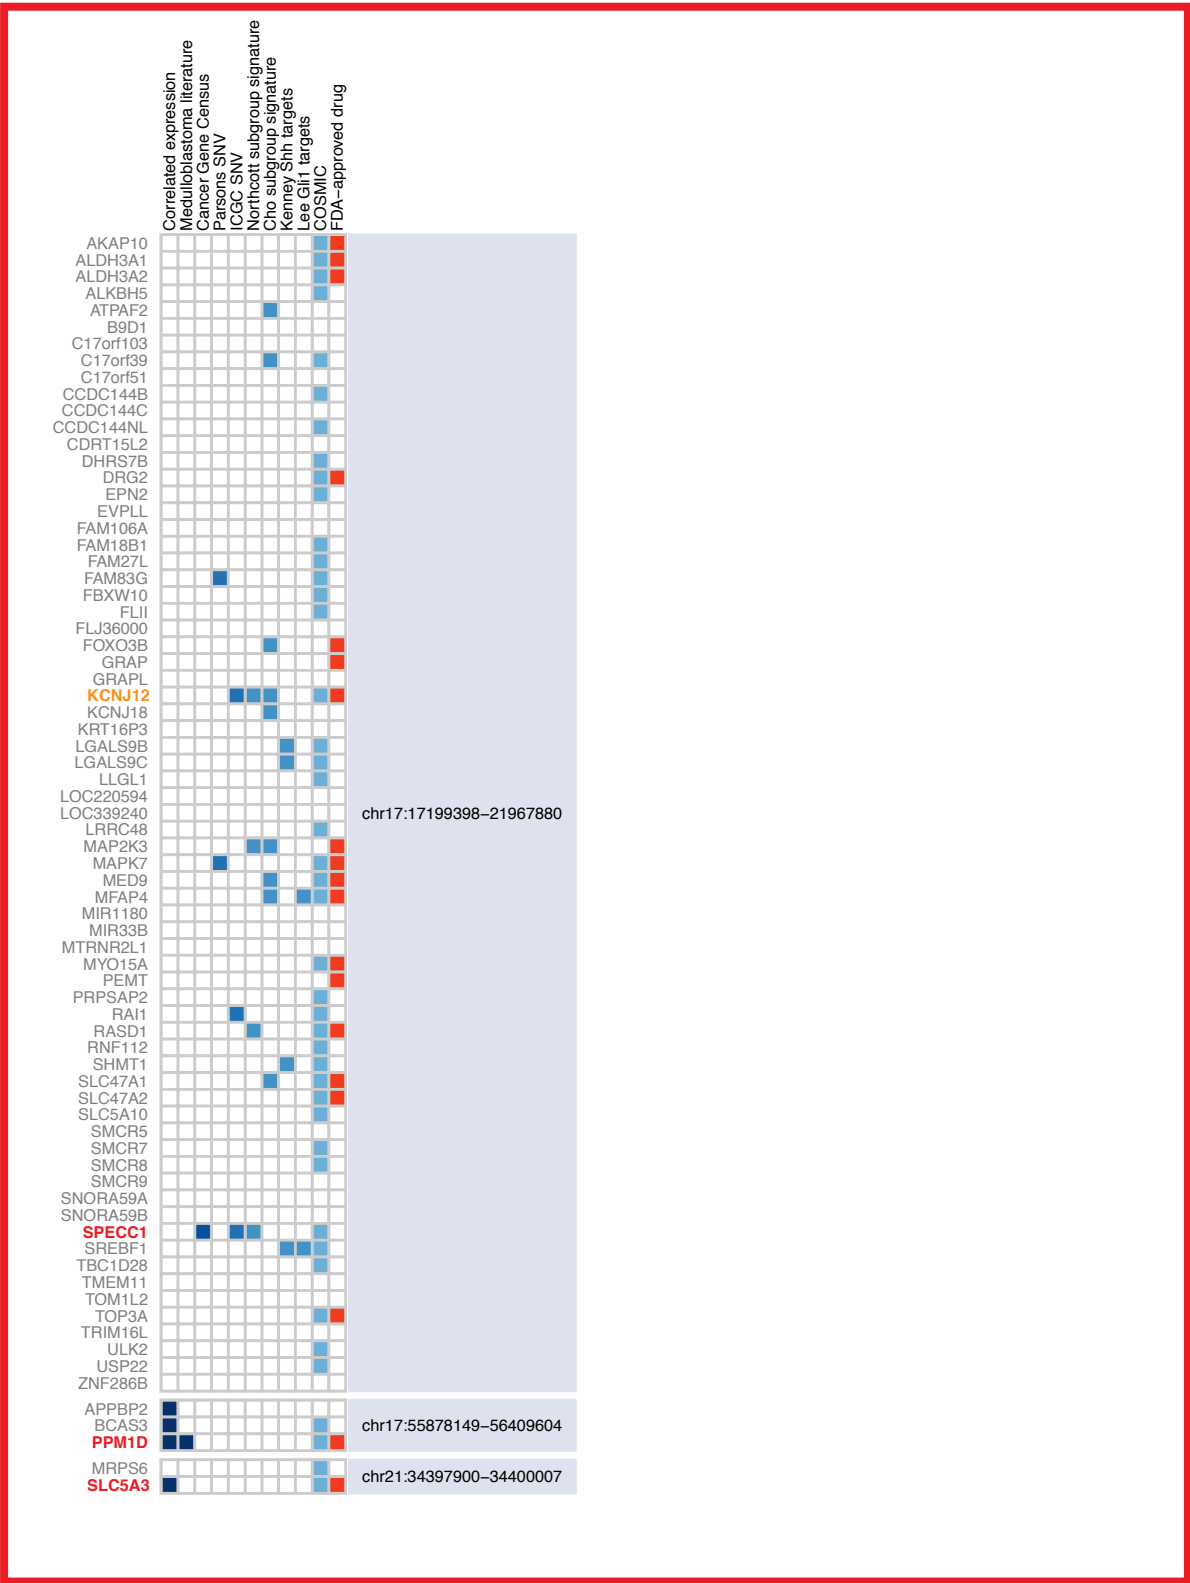

**Supplementary Figure 15. Evidence-based ranking of candidate target genes in SHH amplification regions.** Candidate genes from significant GISTIC2 amplification regions are depicted by evidence ranking grids. The top candidates appear in bold (red: first-rank candidates, orange: second-rank candidates). Within each region, genes are ranked based on availability of supporting evidence from the listed dataset. Shades of blue reflect the weight of each dataset, which are prioritized by tiers: I, Correlated expression, Medulloblastoma literature; II, Cancer Gene Census; III, Parsons SNV, ICGC SNV; IV, Northcott subgroup signature, Cho subgroup signature, Kenney Shh targets, Lee Gli1 targets; V, COSMIC. The availability of FDA-approved drugs is shown in orange, but it is not included in the ranking. Candidate driver genes were inferred by considering evidence of each tier in increasing order.

SHH Deletion Regions: Part A

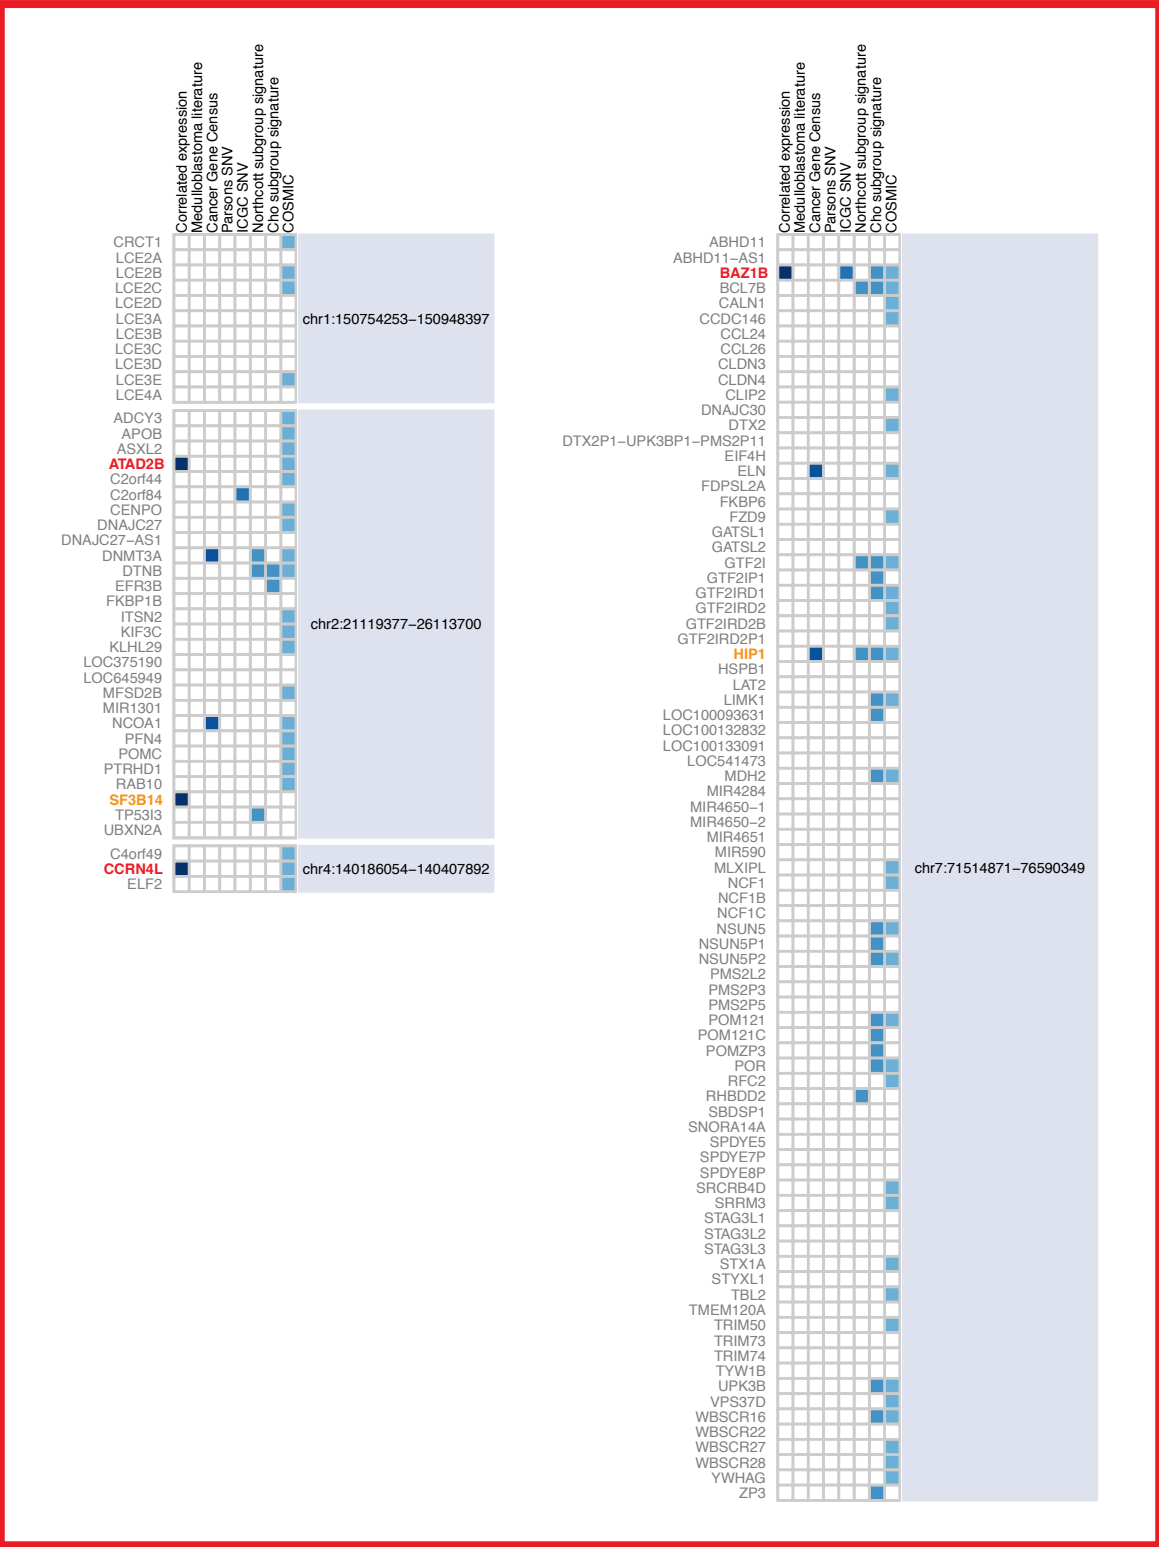

SHH Deletion Regions: Part B

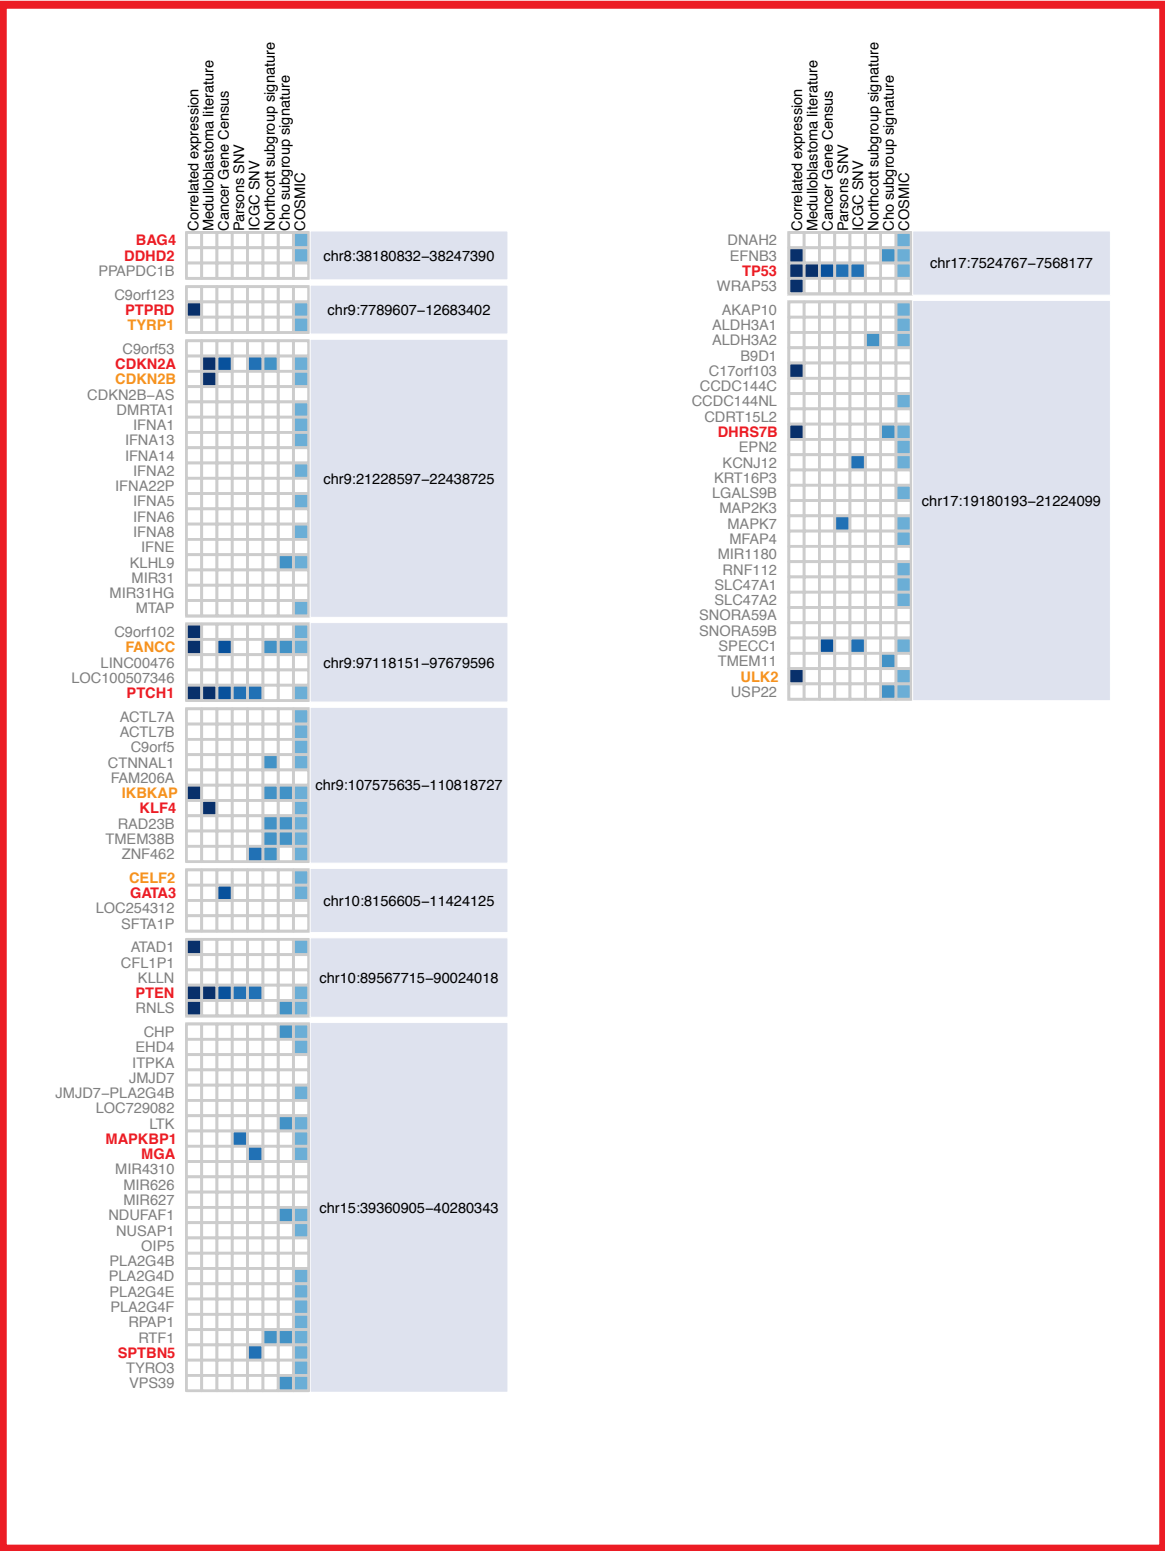

**Supplementary Figure 16. Evidence-based ranking of candidate target genes in SHH deletion regions.** Candidate genes from significant GISTIC2 deletion regions are depicted by evidence ranking grids. The top candidates appear in bold (red: first-rank candidates, orange: second-rank candidates). Within each region, genes are ranked based on availability of supporting evidence from the listed data-set. Shades of blue reflect the weight of each dataset, which are prioritized by tiers: I, Correlated expression, Medulloblastoma literature; II, Cancer Gene Census; III, Parsons SNV, ICGC SNV; IV, Northcott subgroup signature, Cho subgroup signature; V, COSMIC. Candidate driver genes were inferred by considering evidence of each tier in increasing order.

Group 3 Amplified Regions: Part A

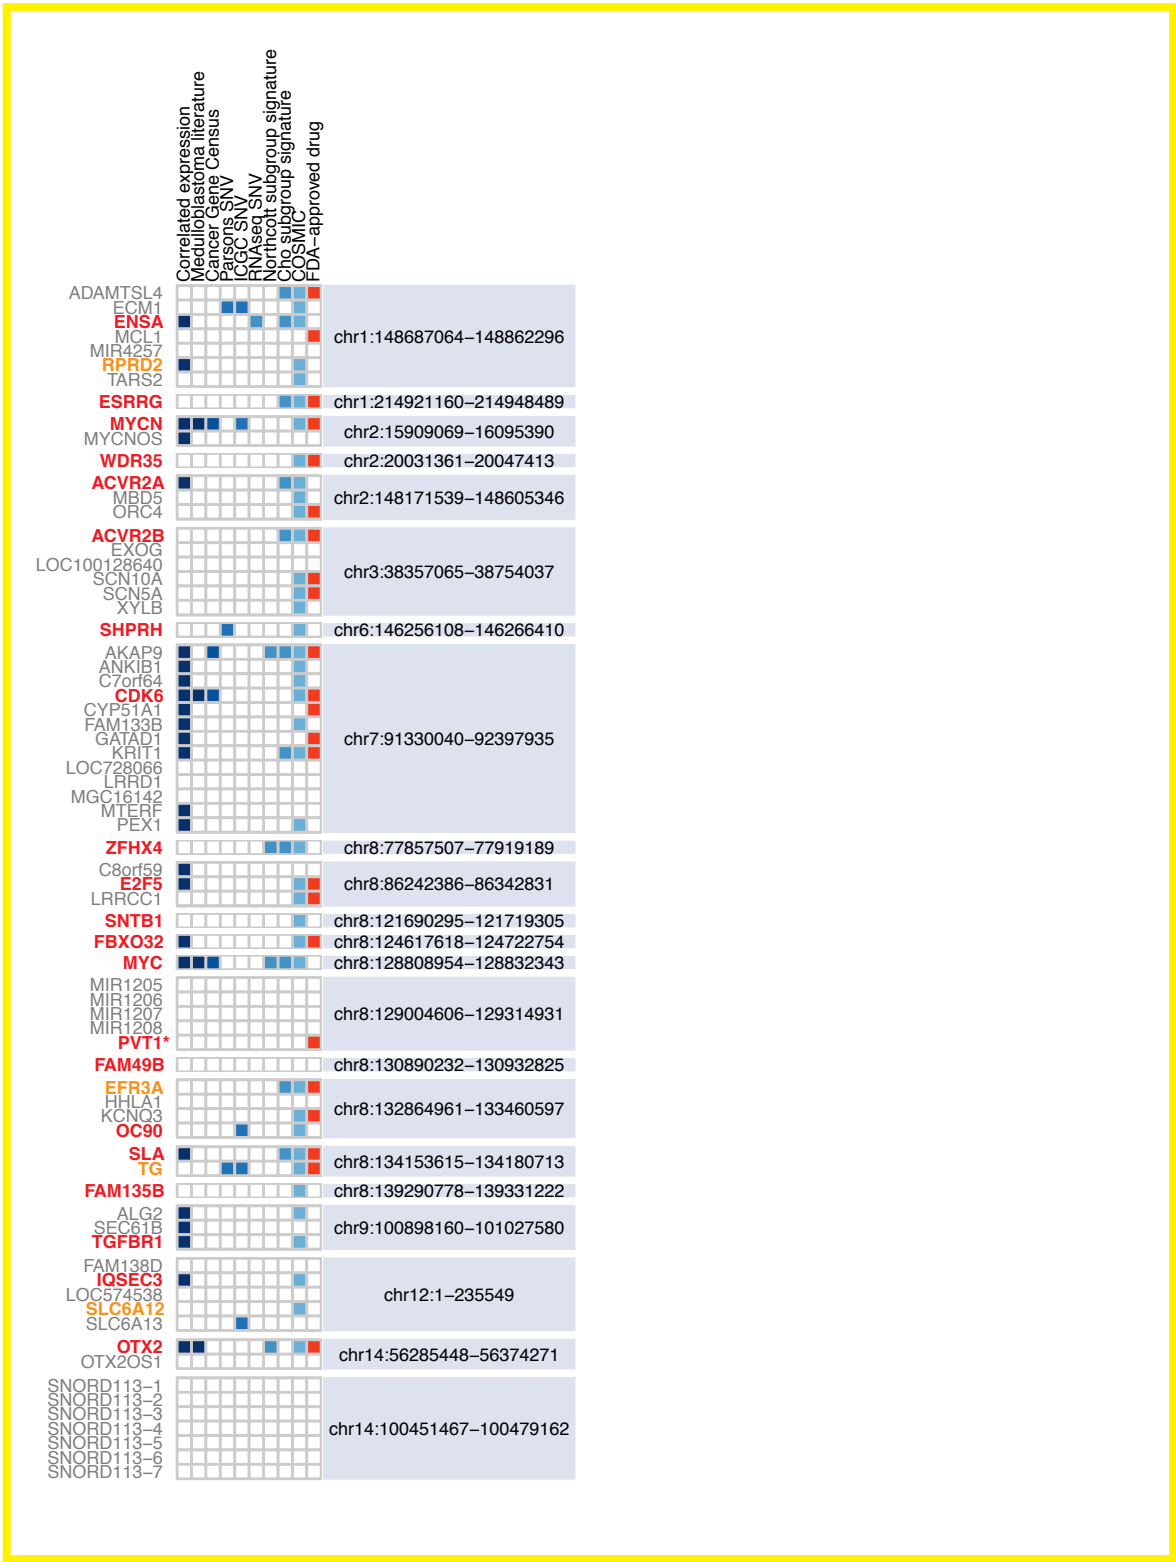

**Supplementary Figure 17. Evidence-based ranking of candidate target genes in Group 3 amplification regions.** Candidate genes from significant GISTIC2 amplification regions are depicted by evidence ranking grids. The top candidates appear in bold (red: first-rank candidates, orange: second-rank candidates). Within each region, genes are ranked based on availability of supporting evidence from the listed dataset. Shades of blue reflect the weight of each dataset, which are prioritized by tiers: I, Correlated expression, Medulloblastoma literature; II, Cancer Gene Census; III, Parsons SNV, ICGC SNV; IV, RNAseq SNV, Northcott subgroup signature, Cho subgroup signature; V, COSMIC. The availability of FDA-approved drugs is shown in orange, but it is not included in the ranking. Candidate driver genes were inferred by considering evidence of each tier in increasing order.

Group 3 Deletion Regions: Part A

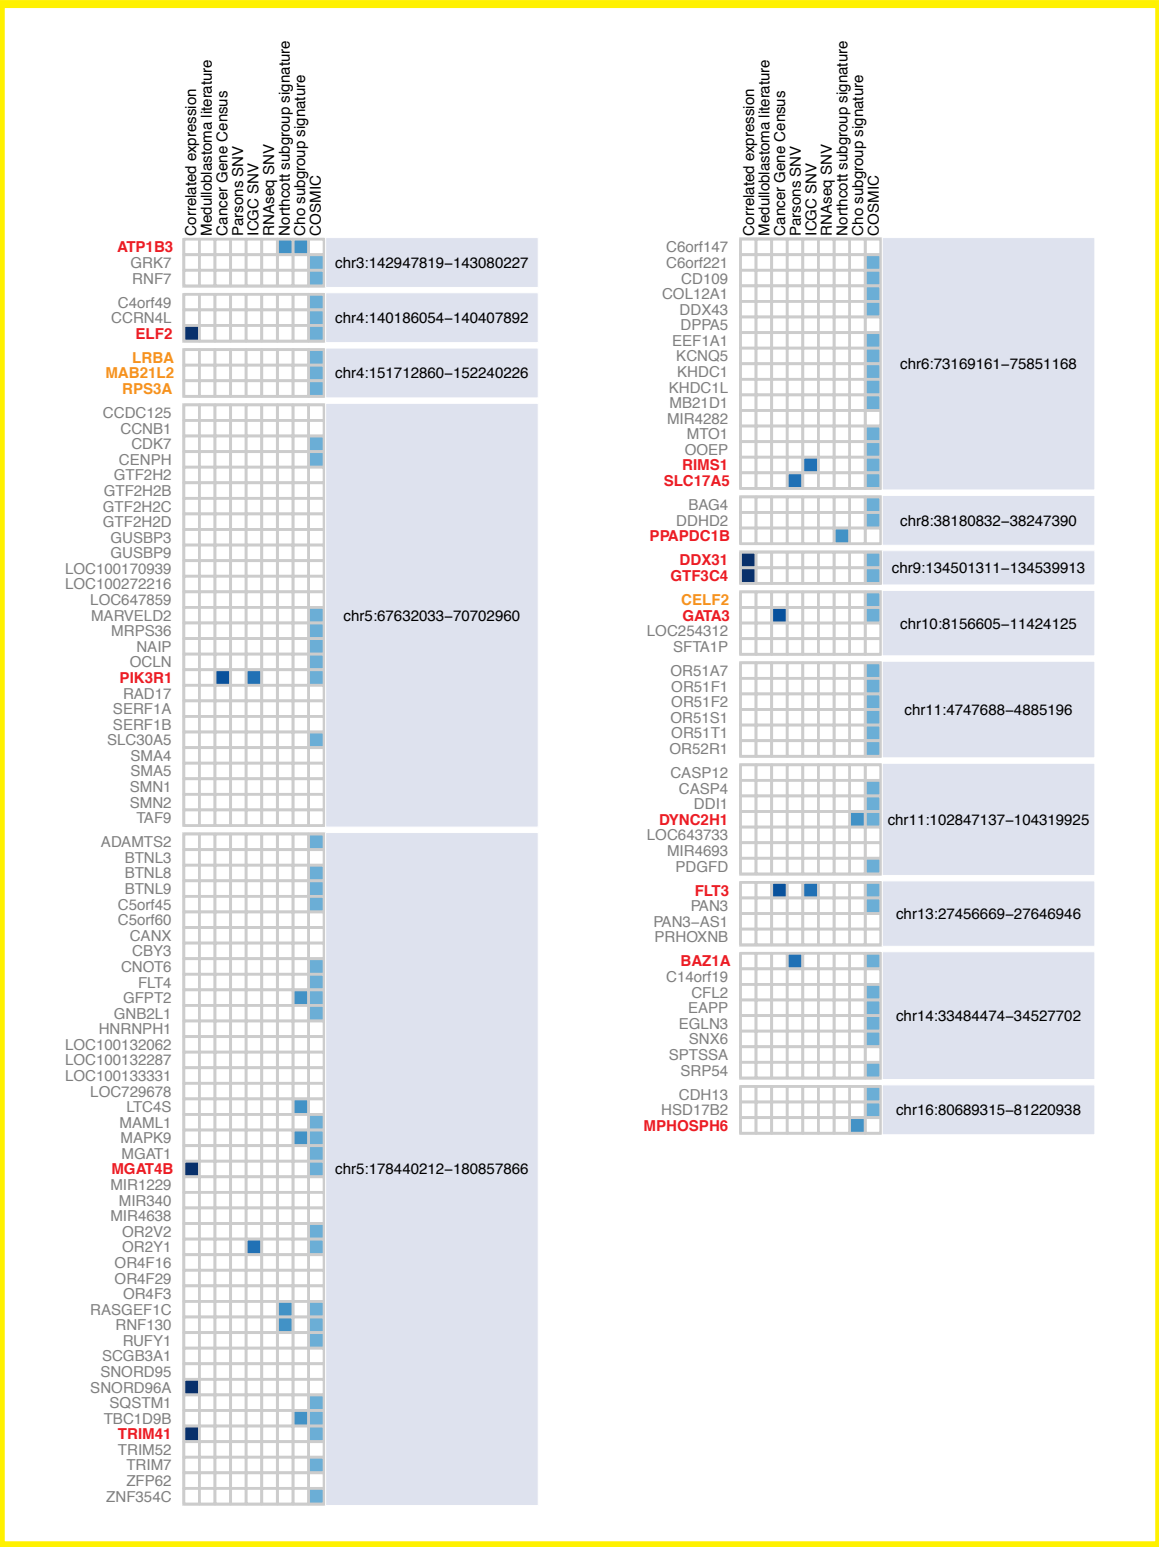

Group 3 Deletion Regions: Part B

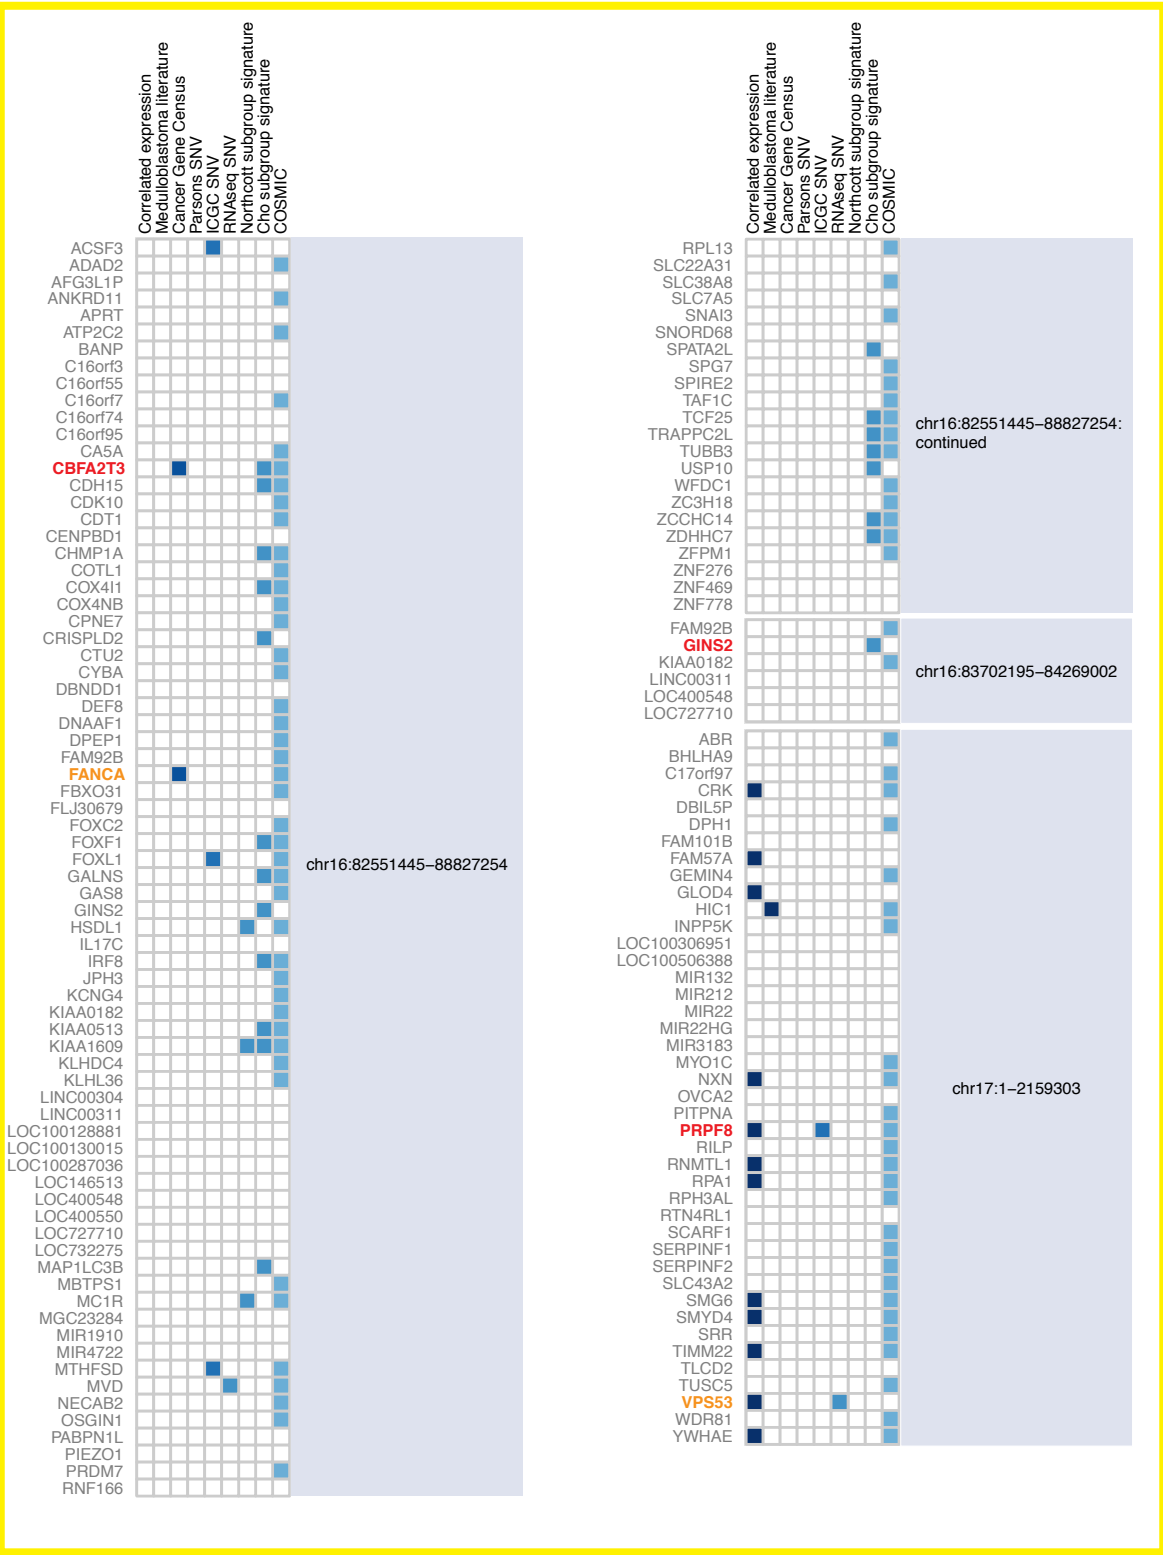

Group 3 Deletion Regions: Part C

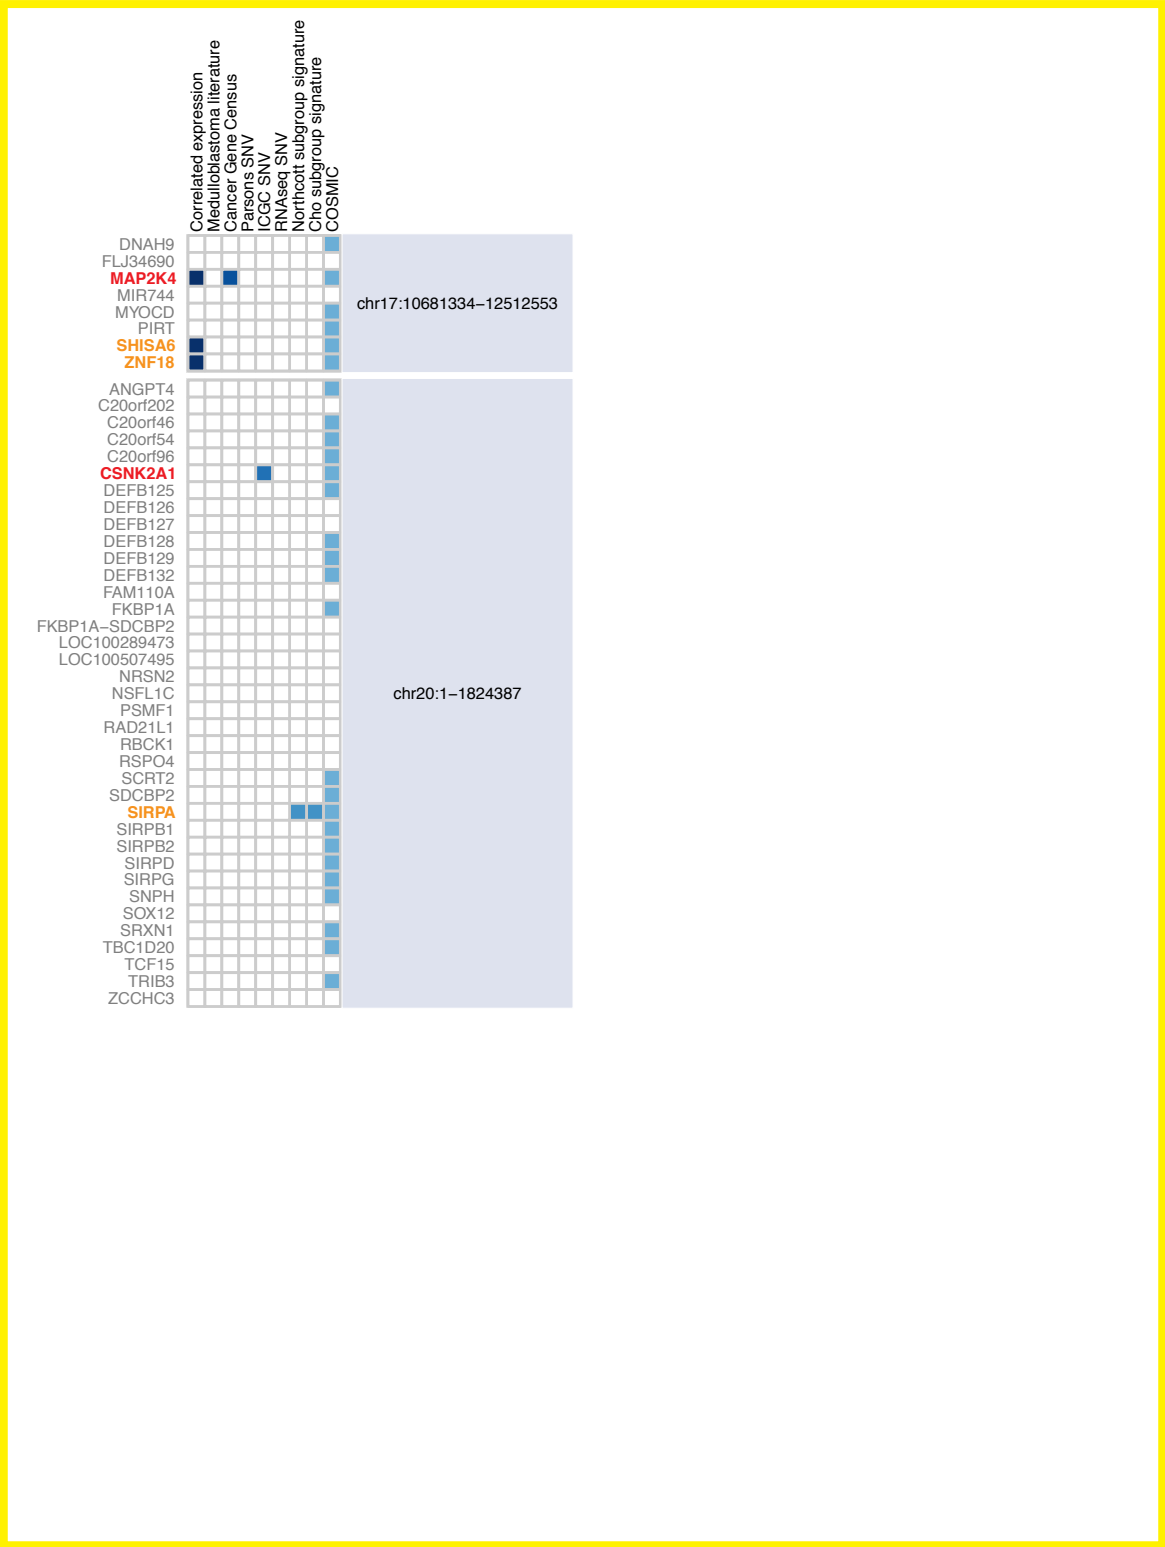

**Supplementary Figure 18. Evidence-based ranking of candidate target genes in Group 3 deletion regions.** Candidate genes from significant GISTIC2 deletion regions are depicted by evidence ranking grids. The top candidates appear in bold (red: first-rank candidates, orange: second-rank candidates). Within each region, genes are ranked based on availability of supporting evidence from the listed data-set. Shades of blue reflect the weight of each dataset, which are prioritized by tiers: I, Correlated expression, Medulloblastoma literature; II, Cancer Gene Census; III, Parsons SNV, ICGC SNV; IV, RNAseq SNV, Northcott subgroup signature, Cho subgroup signature; V, COSMIC. Candidate driver genes were inferred by considering evidence of each tier in increasing order.

Group 4 Amplified Regions: Part A

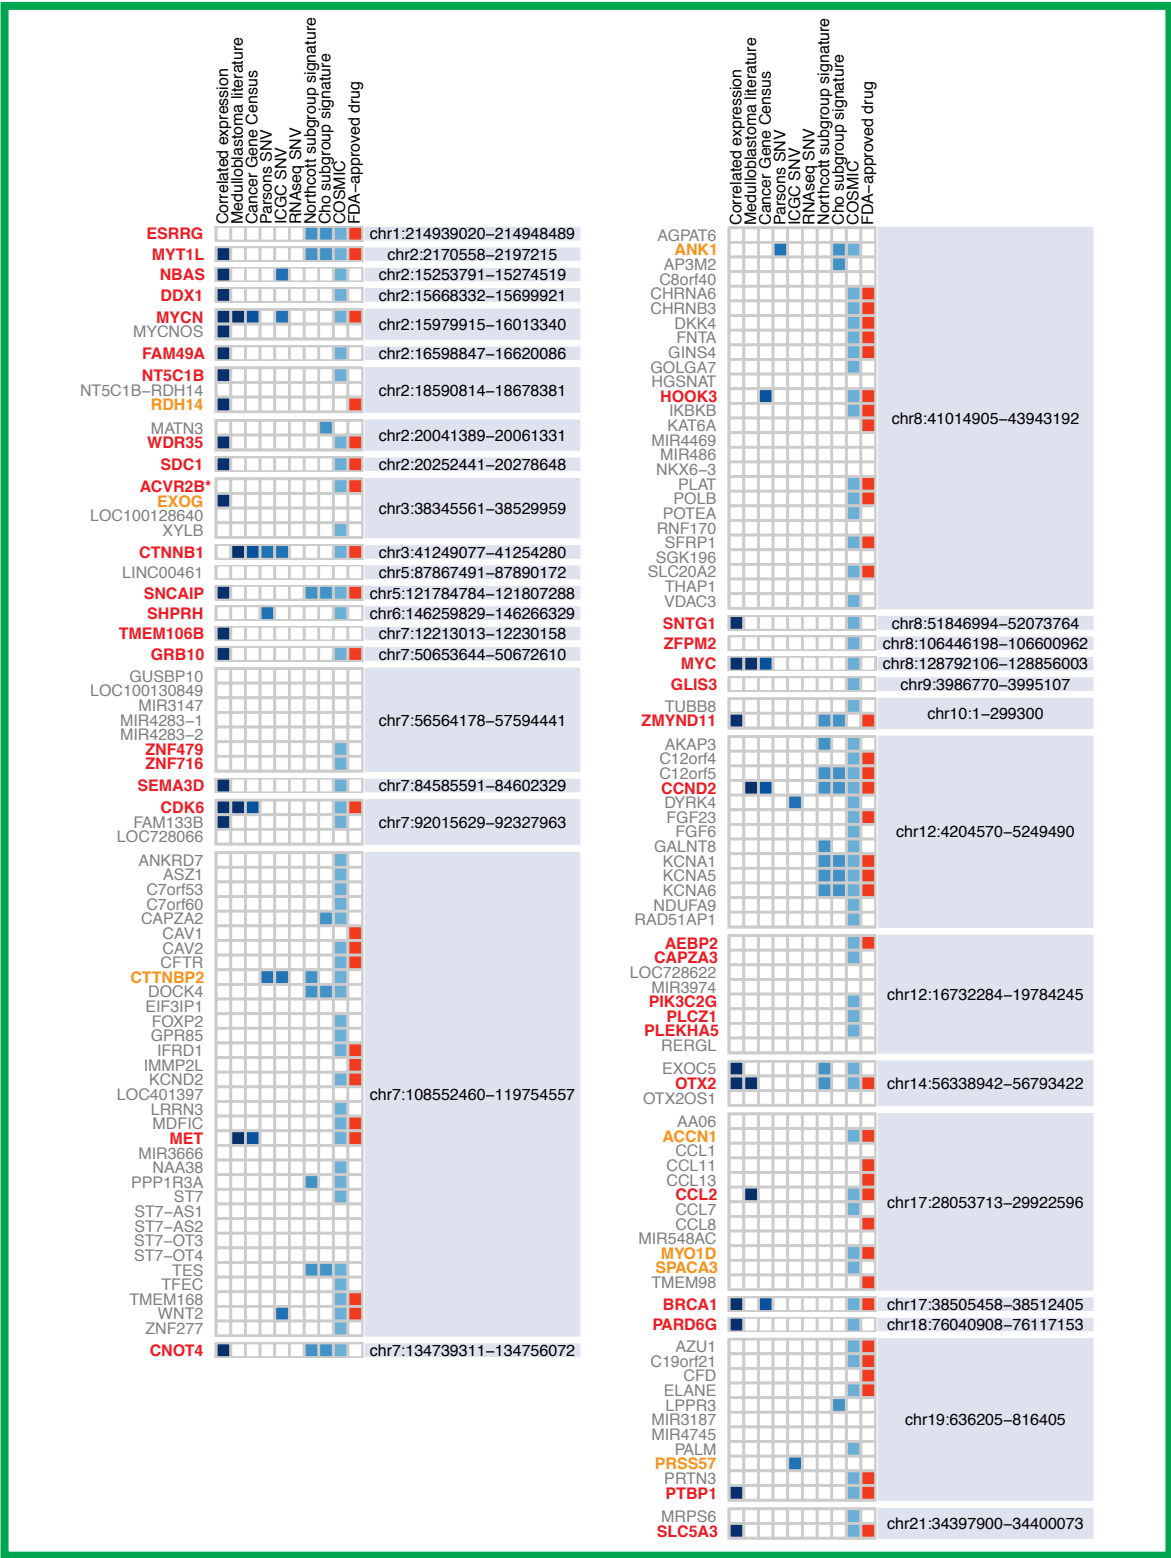

**Supplementary Figure 19. Evidence-based ranking of candidate target genes in Group 4 amplification regions.** Candidate genes from significant GISTIC2 amplification regions are depicted by evidence ranking grids. The top candidates appear in bold (red: first-rank candidates, orange: second-rank candidates). Within each region, genes are ranked based on availability of supporting evidence from the listed dataset. Shades of blue reflect the weight of each dataset, which are prioritized by tiers: I, Correlated expression, Medulloblastoma literature; II, Cancer Gene Census; III, Parsons SNV, ICGC SNV; IV, RNAseq SNV, Northcott subgroup signature, Cho subgroup signature; V, COSMIC. The availability of FDA-approved drugs is shown in orange, but it is not included in the ranking. Candidate driver genes were inferred by considering evidence of each tier in increasing order.

Group 4 Deletion Regions: Part A

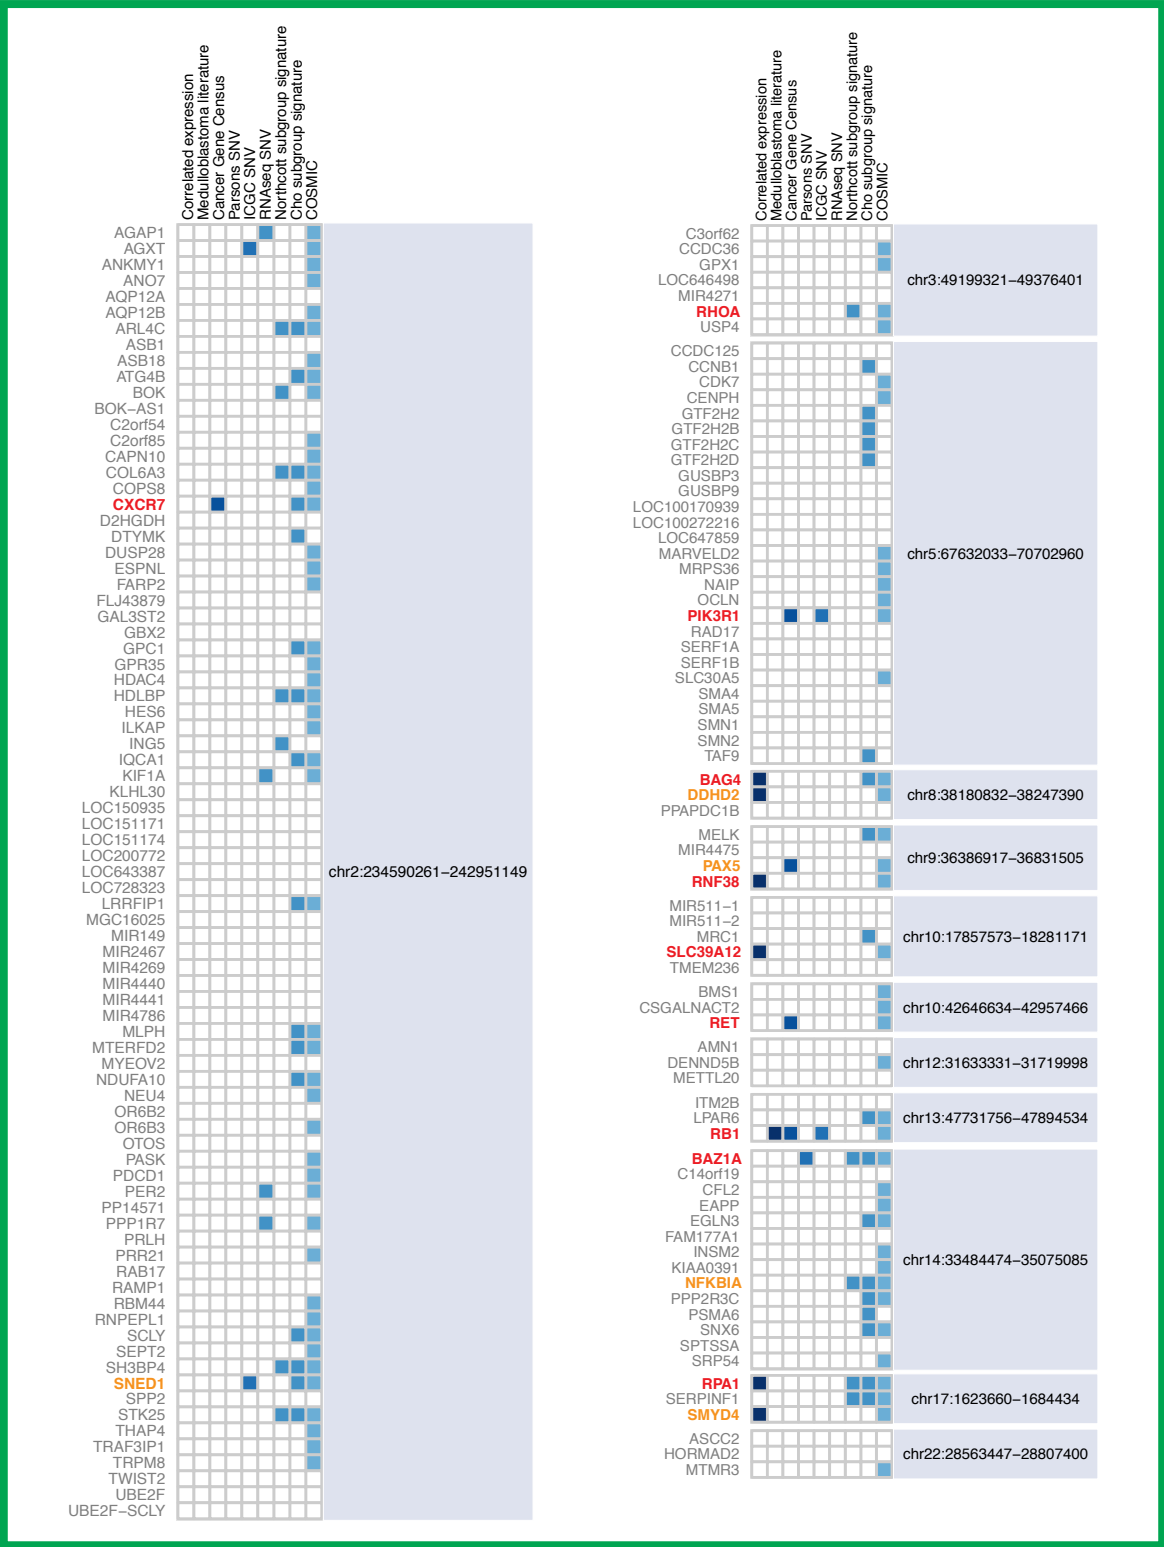

**Supplementary Figure 20. Evidence-based ranking of candidate target genes in Group 4 deletion regions.** Candidate genes from significant GISTIC2 deletion regions are depicted by evidence ranking grids. The top candidates appear in bold (red: first-rank candidates, orange: second-rank candidates). Within each region, genes are ranked based on availability of supporting evidence from the listed data-set. Shades of blue reflect the weight of each dataset, which are prioritized by tiers: I, Correlated expression, Medulloblastoma literature; II, Cancer Gene Census; III, Parsons SNV, ICGC SNV; IV, RNAseq SNV, Northcott subgroup signature, Cho subgroup signature; V, COSMIC. Candidate driver genes were inferred by considering evidence of each tier in increasing order.

Supplementary Figure 21, Northcott, Shih et al

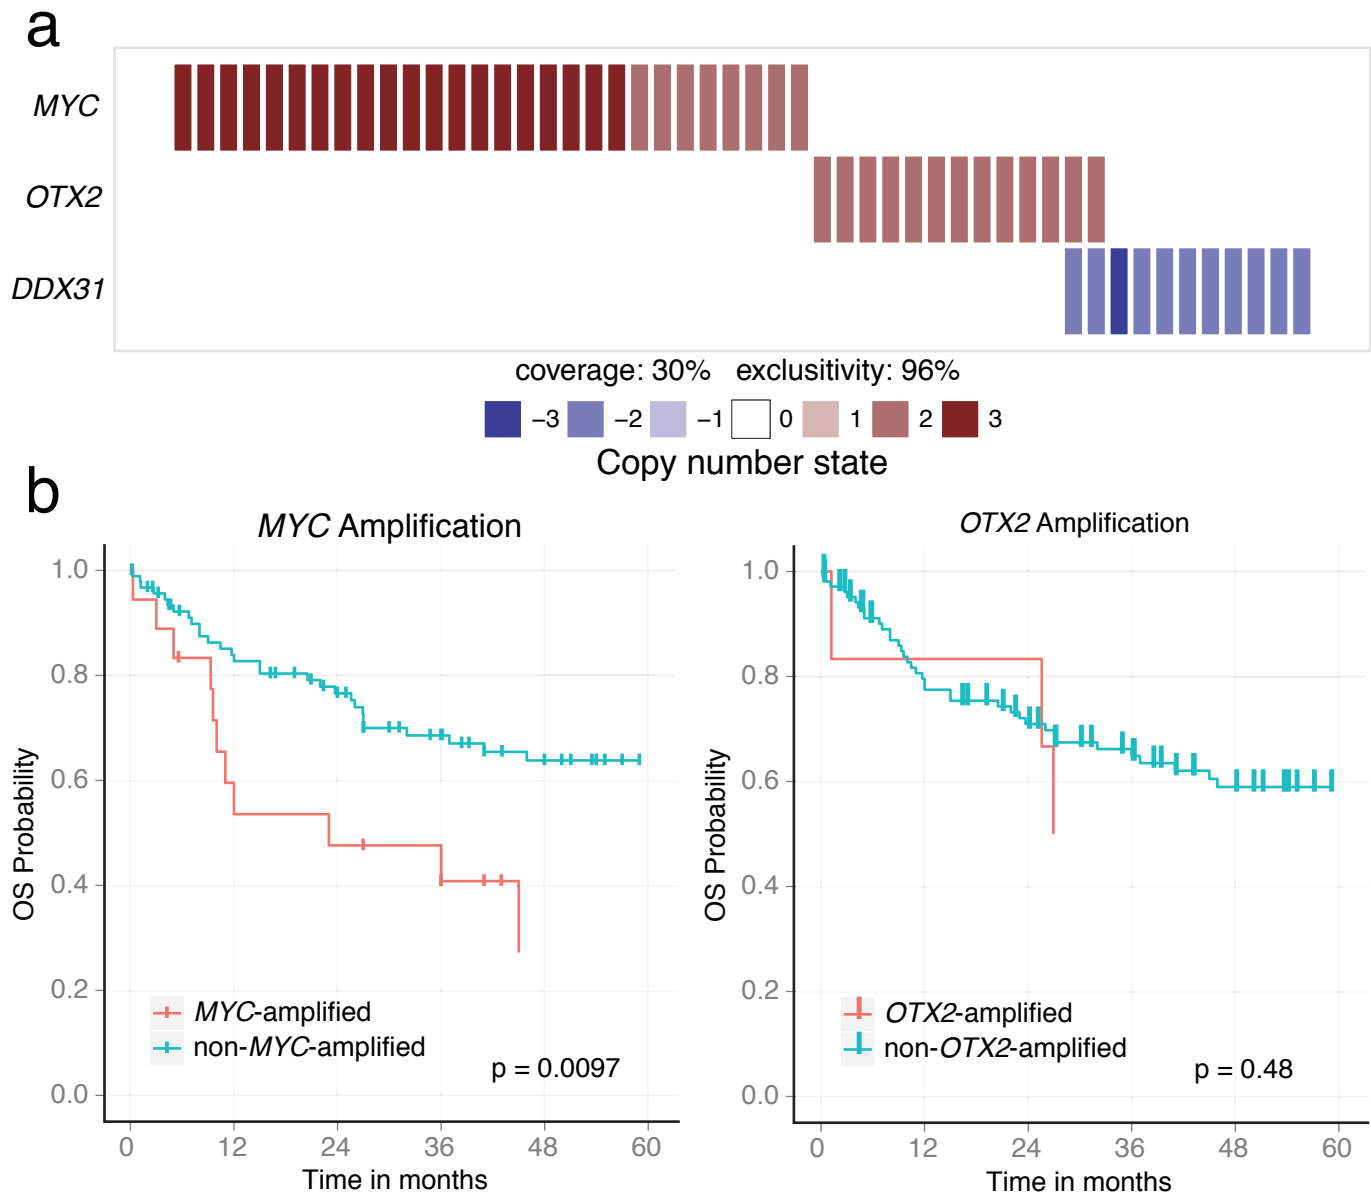

**Supplementary Figure 21. Significance of *MYC* amplification in Group 3 medulloblastoma. a,** Mutual exclusivity analysis of top focal SCNAs in Group 3 shows that *MYC* and *OTX2* aberrations are completely exclusive in this cohort. **b,** Prognostic significance of *MYC* and *OTX2* aberrations in Group 3 (log-rank tests).

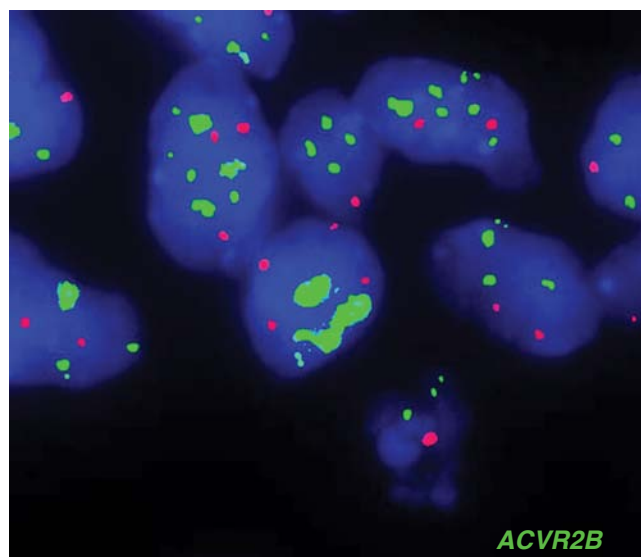

**Supplementary Figure 22. Validation of *ACVR2B* amplification in medulloblastoma.** FISH validation of *ACVR2B* amplification in a non-overlapping series of medulloblastomas present on a TMA.

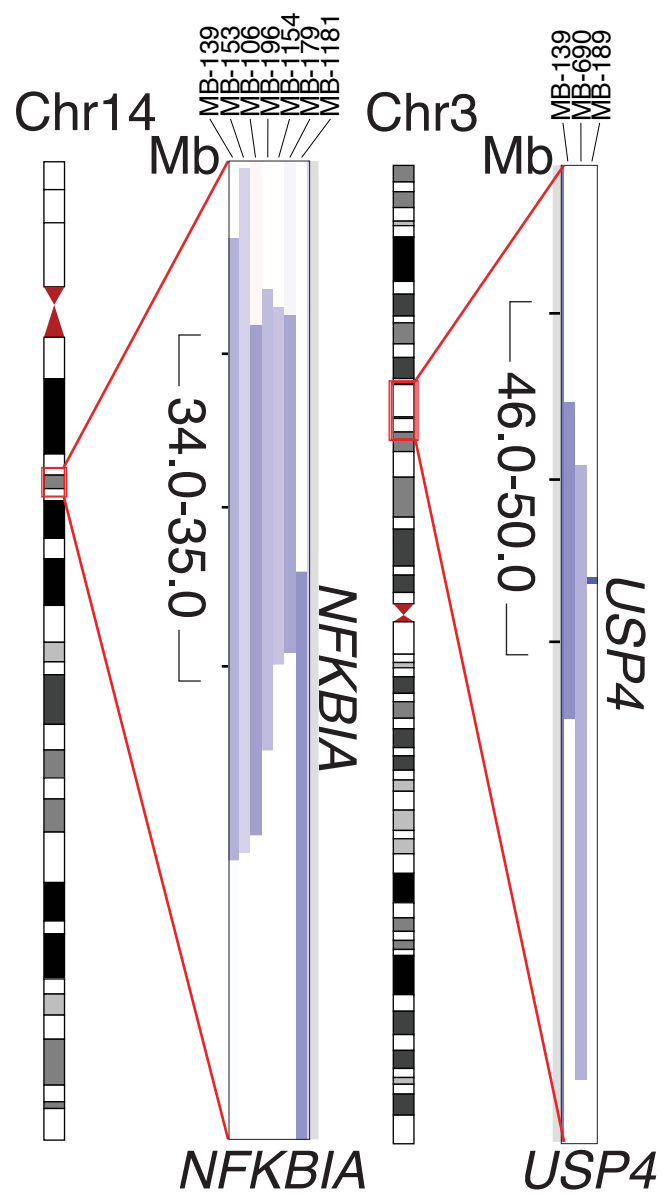

**Supplementary Figure 23. Recurrent focal deletions affecting negative regulators of the NF- $\kappa$ B pathway in Group 4.** Copy number heatmaps demonstrate recurrent focal deletions of *NFKBIA* and *USP4* in Group 4.

## Supplementary Figure 24, Northcott, Shih et al

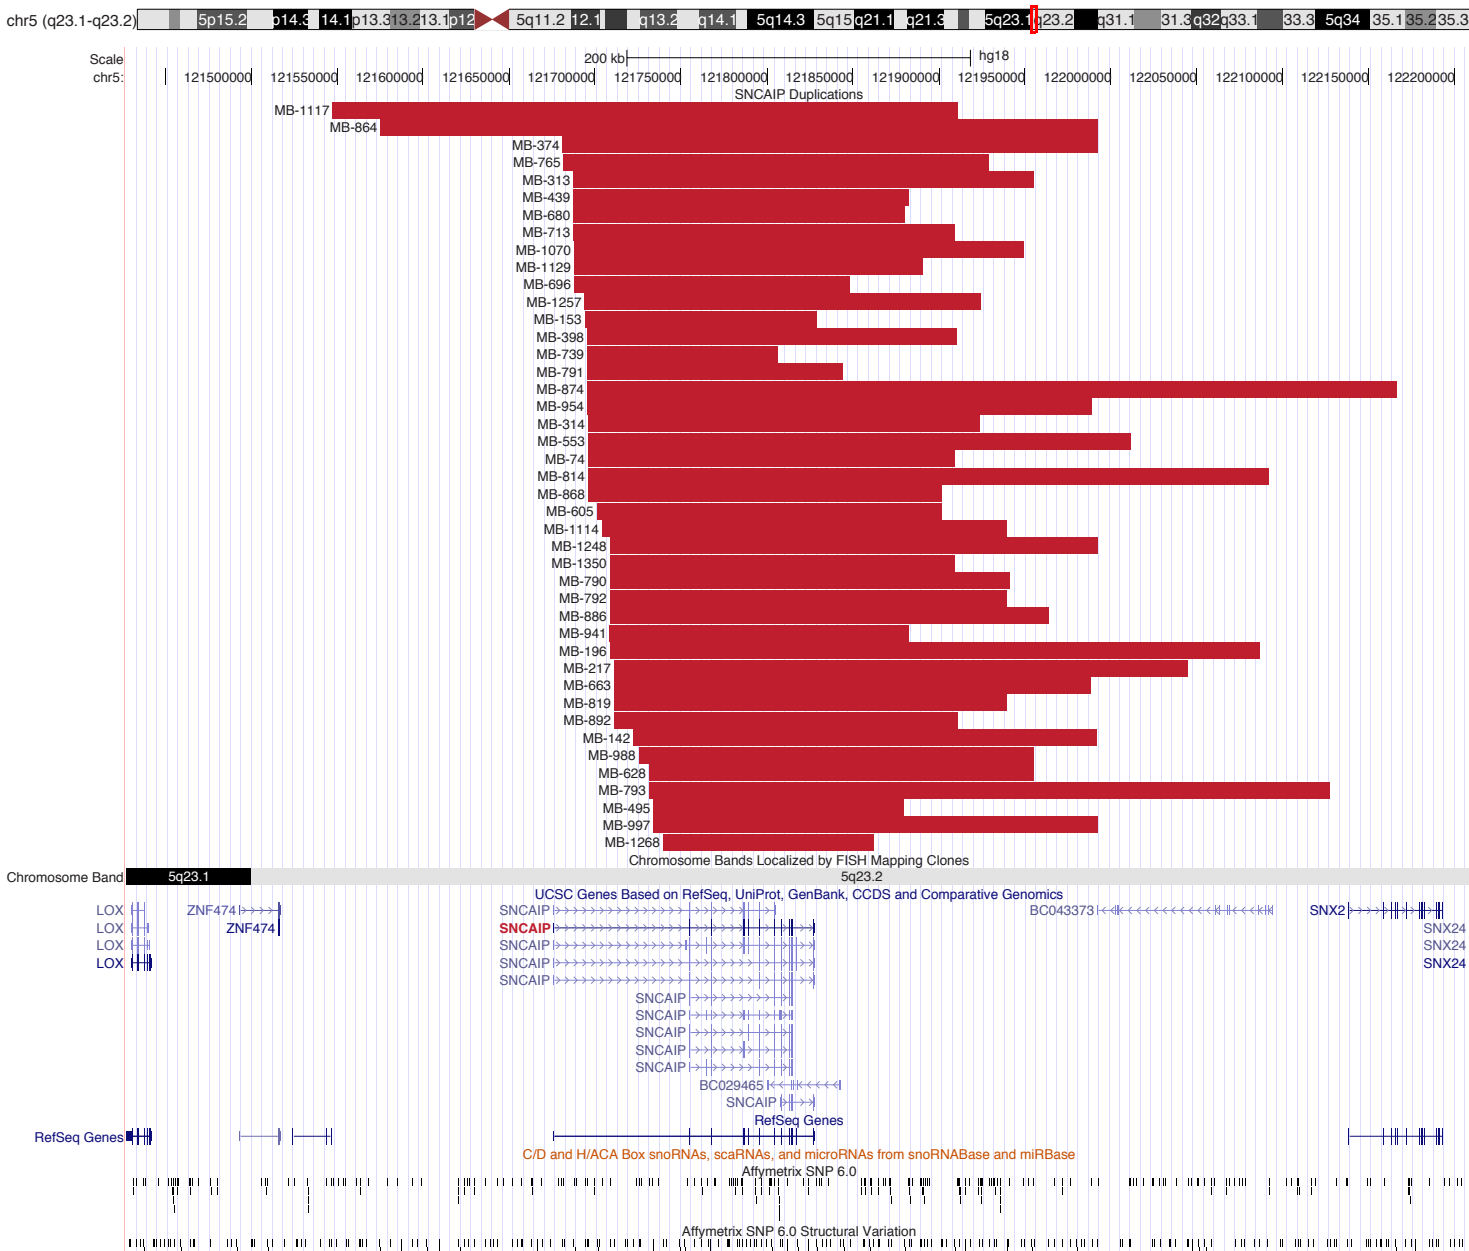

**Supplementary Figure 24. Tandem duplication of *SNCAIP* on chr5q23.2 in Group 4 medulloblastoma.** UCSC Genome Browser output (hg18) of the *SNCAIP* locus and neighboring genes on chromosome 5q23.2. A custom track ('SNCAIP Duplications') showing copy number segments (gains) in 43 medulloblastoma samples with *SNCAIP* duplication (highlighted red) has been included above the gene content window. All SCNAs shown above directly target *SNCAIP*; in 42/43 cases, *SNCAIP* is the only RefSeq gene affected.

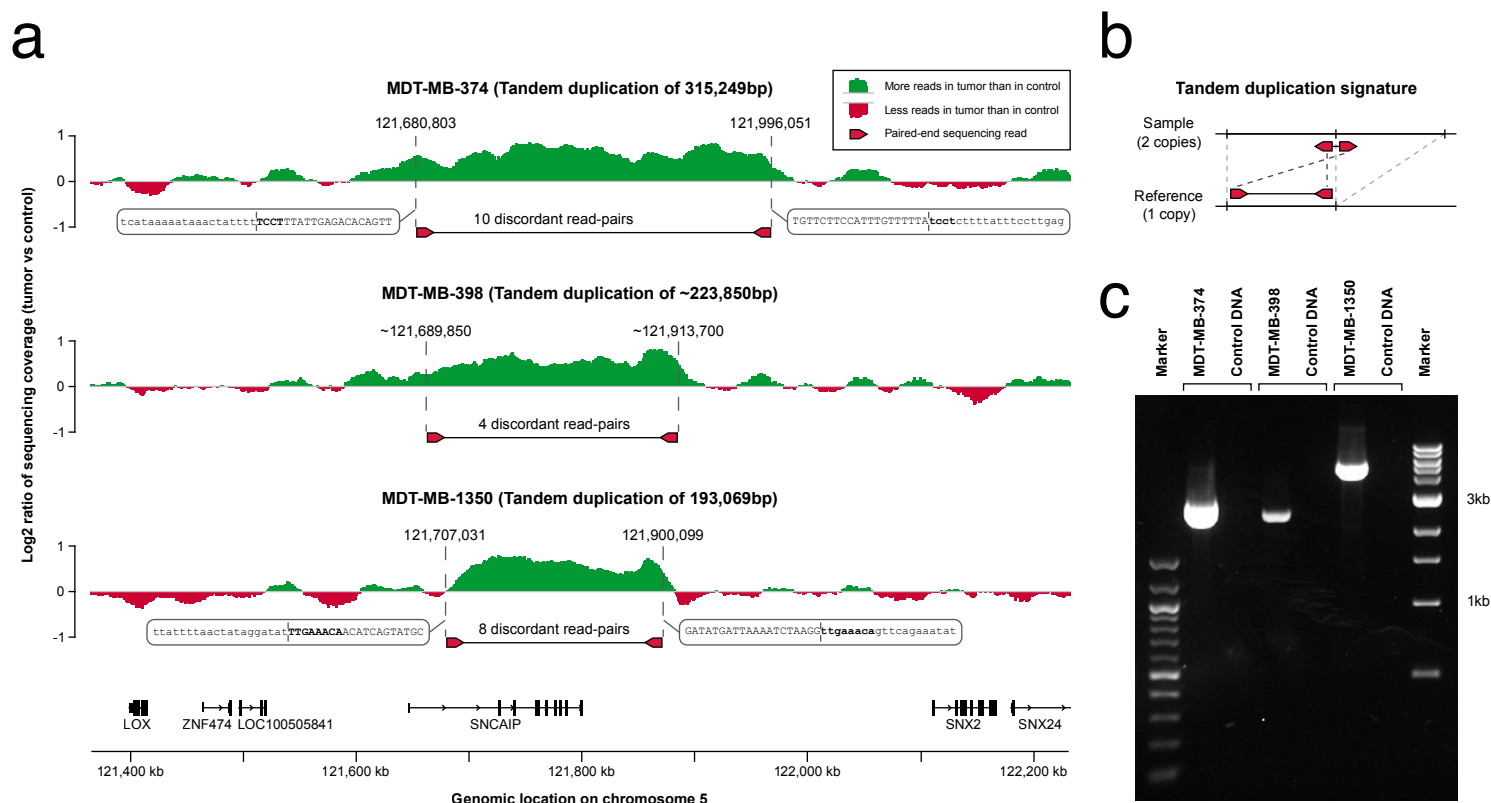

**Supplementary Figure 25. Paired-end sequencing and reconstruction of tandem duplications overlapping the *SNCAIP* gene.** **a**, Log<sub>2</sub> ratio of sequencing coverage (tumor vs control) of three Group 4 samples with SNP6-inferred *SNCAIP* copy number gains. Positive values (shown in green) indicate regions with more sequenced reads in the tumour compared to the control sample. Negative values (shown in red) indicate regions with less sequenced reads in the tumour compared to the control sample. The dashed lines mark the start and end of the duplications. Below each plot, the number of discordantly mapping read-pairs, identified by high-resolution and massive paired-end mapping, are shown. For MDT-MB-374 and MDT-MB-1350, the exact breakpoint position of the respective tandem duplication was determined by Sanger sequencing. DNA sequences corresponding to the breakpoint junctions are indicated. Uppercase sequences are within the tandem duplication. Nucleotides in bold highlight microhomologies. **b**, Scheme showing the mapping of read-pairs overlapping a tandem duplication breakpoint. The read orientation applies to long-range paired-end libraries (~4.5kb insert size) sequenced with an Illumina HiSeq2000 instrument. Inward pointing read-pairs with an enlarged insert size indicate the presence of a tandem duplication. **c**, PCR validation of the three tandem duplications. Primers were placed near both inferred breakpoint locations, in such a way that the PCR amplicon would span the breakpoint junctions. As control, commercially available human DNA was used.

# Supplementary Figure 26, Northcott, Shih et al

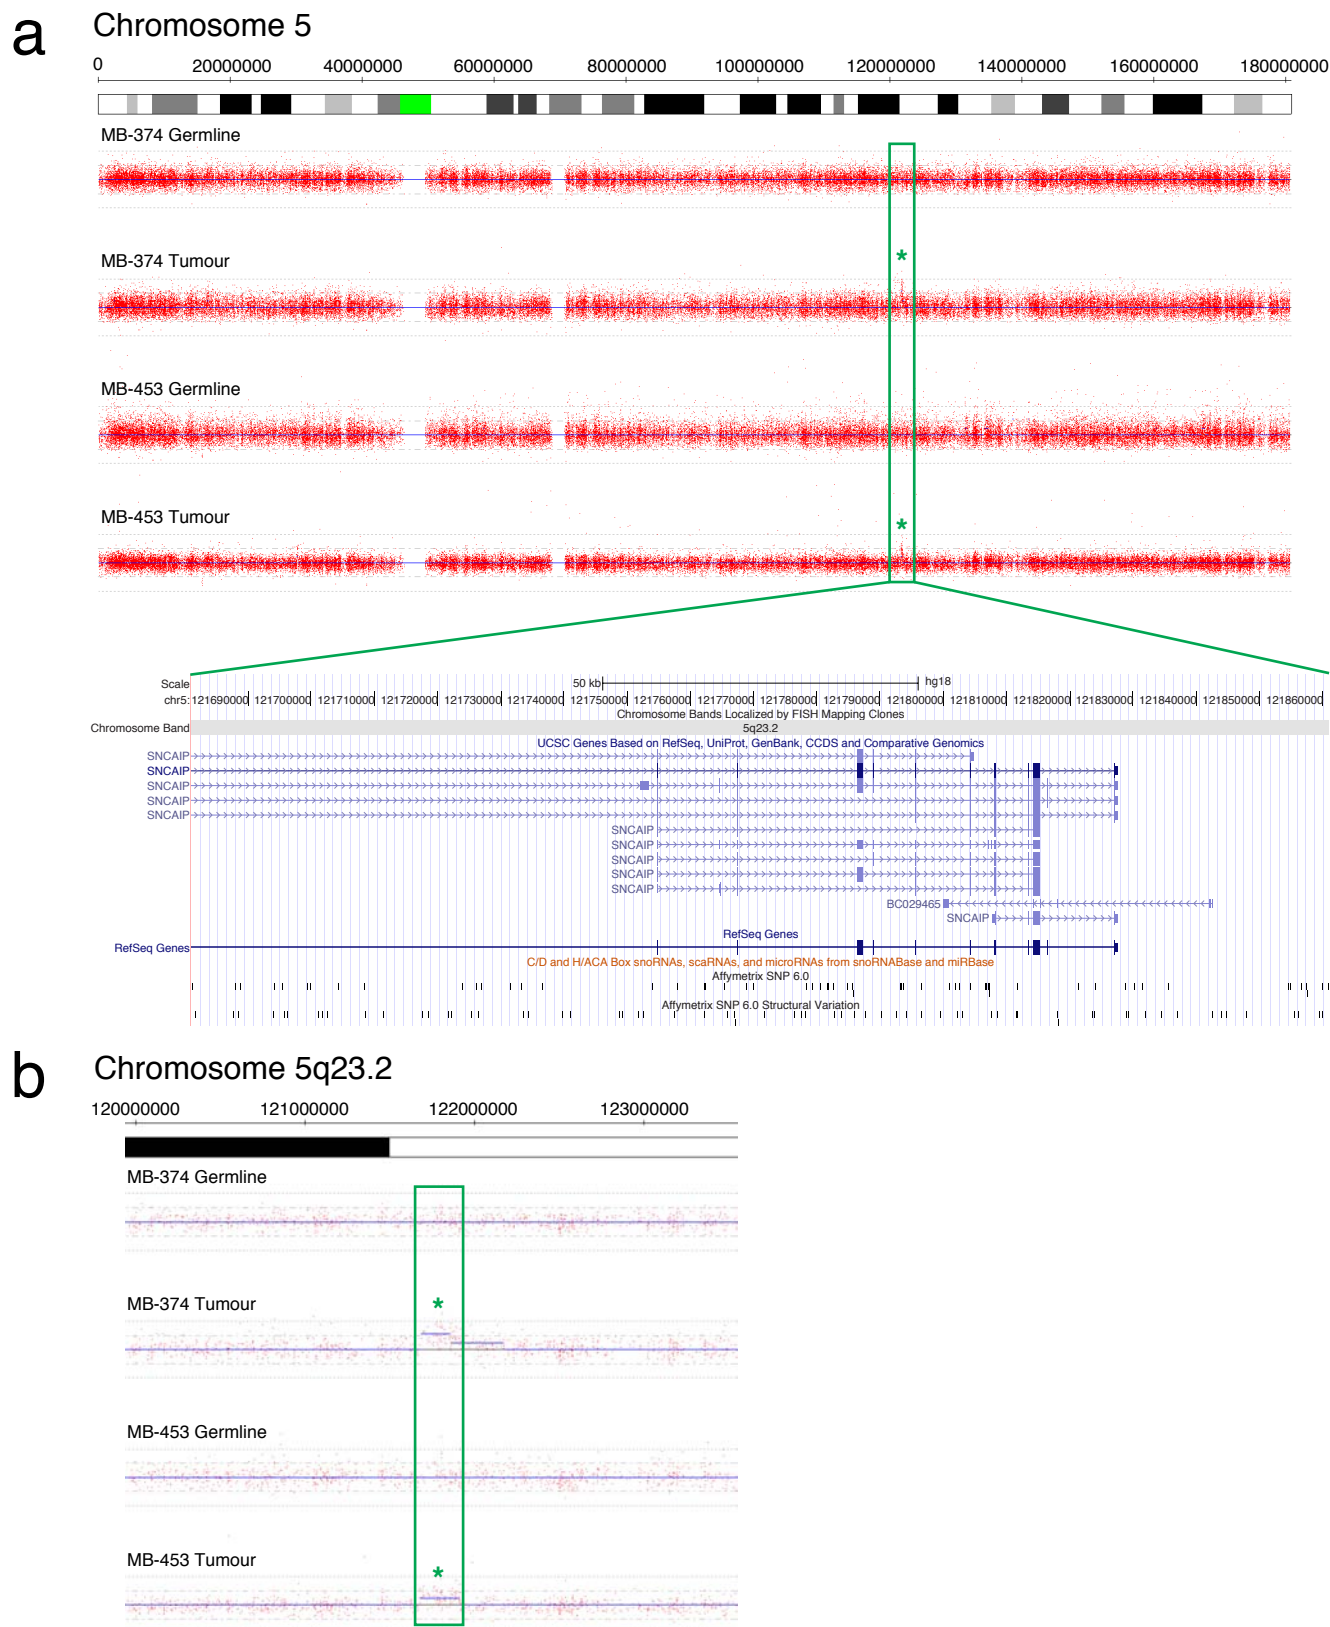

**Supplementary Figure 26. Somatic copy number gain of *SNCAIP* in Group 4 medulloblastoma.** **a**, SNP6 copy number plots of chromosome 5 for two matched tumour/normal pairs, MB-374 and MB-453, are shown. Copy number gains affecting *SNCAIP* (marked with an asterisk) are found in both tumour samples but not in the corresponding germline cases. **b**, Zoomed-in view of copy number profiles in (a), highlighting somatic gain of the *SNCAIP* locus on chr5q23.2.

Supplementary Figure 27, Northcott, Shih et al

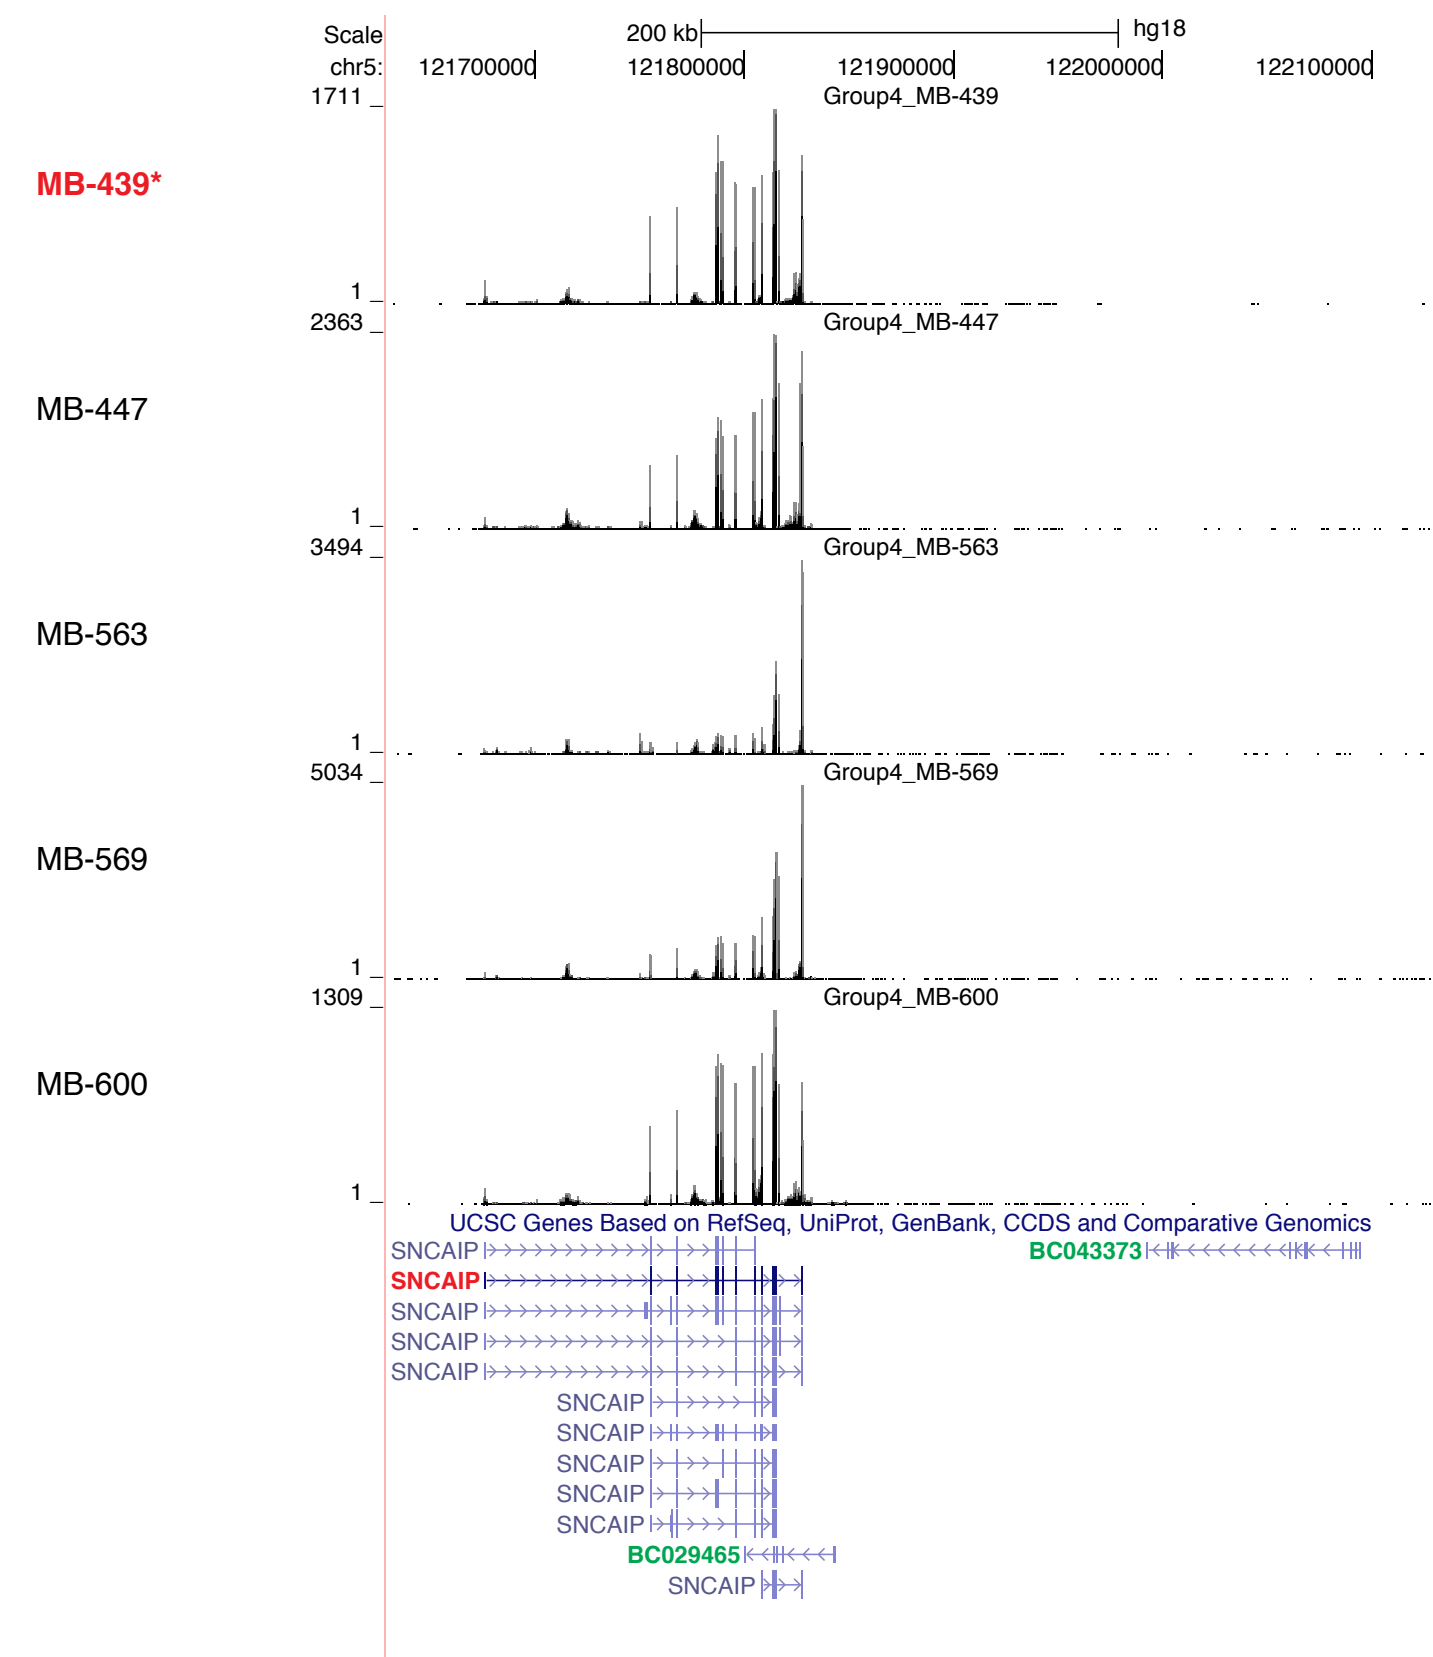

**Supplementary Figure 27. SNCAIP expression in Group 4 medulloblastomas as measured by RNASeq.** Read depth plots of RNASeq data for five Group 4 medulloblastomas provides strong evidence of high SNCAIP expression in these samples whereas there is no support for expression of the overlapping (BCO29465) and downstream (BCO43373) genes. MB-439 (marked in red with an asterisk) harbours the typical *SNCAIP* duplication observed in Group 4.

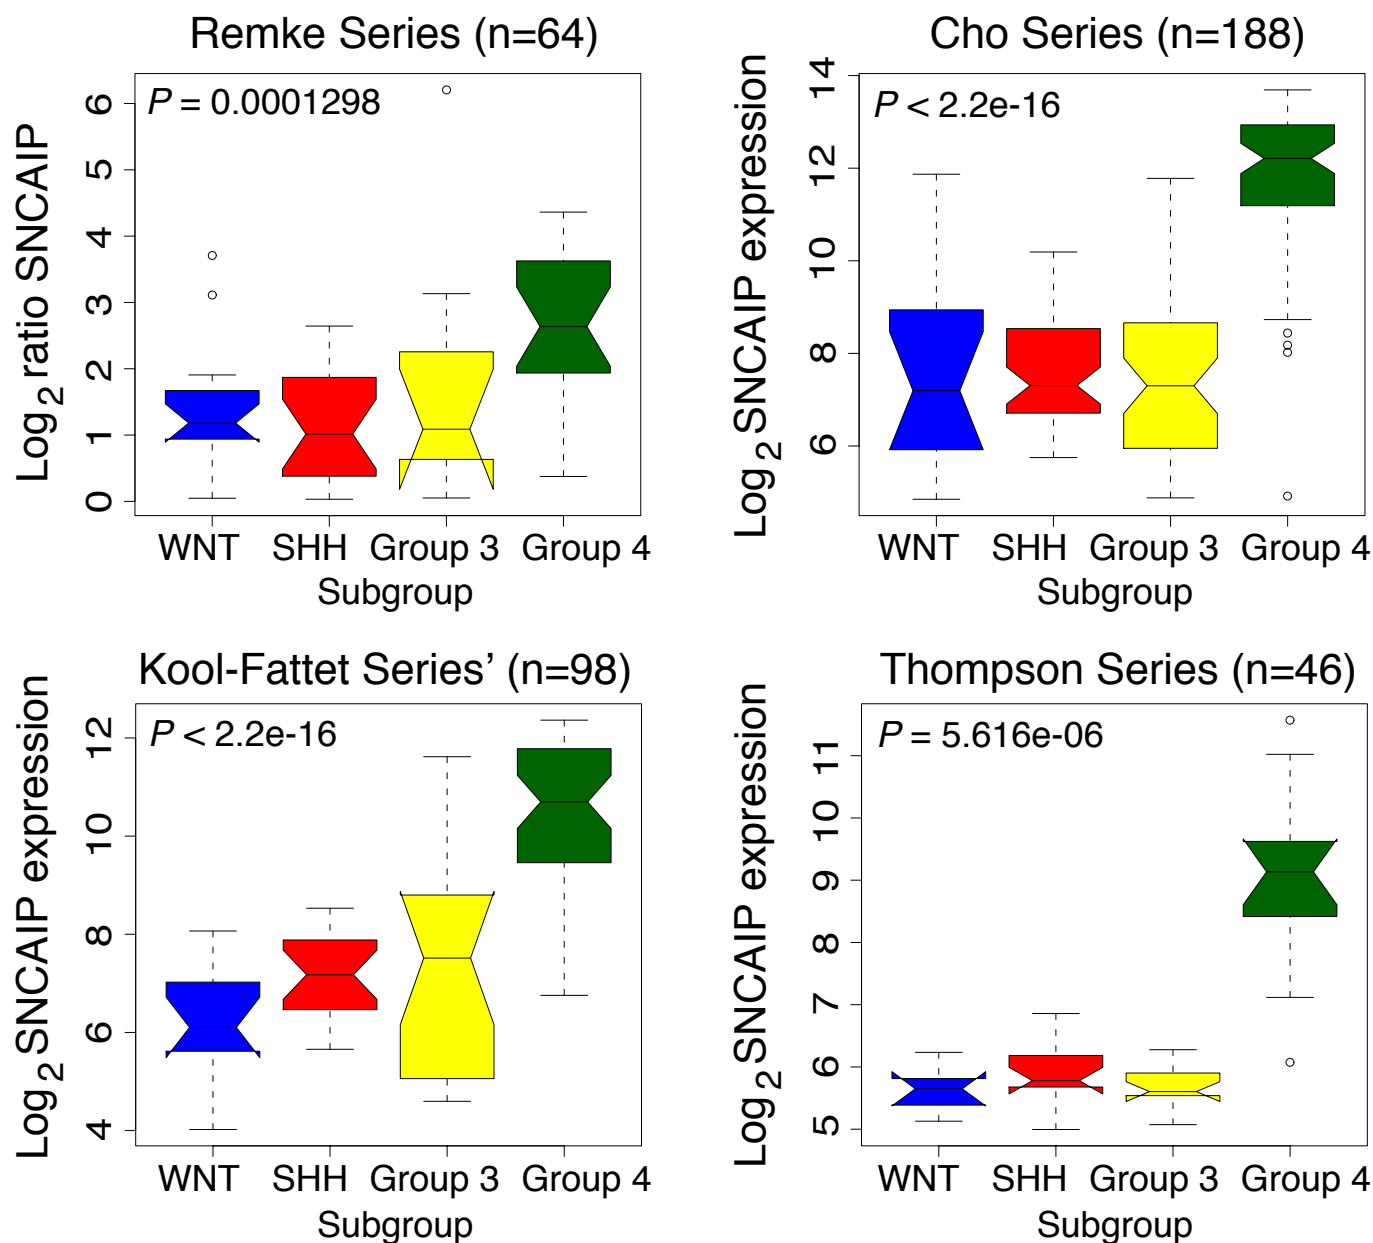

**Supplementary Figure 28. Validation of SNCAIP as a Group 4 signature gene across five published medulloblastoma expression datasets.** SNCAIP expression was analyzed by subgroup using expression array data published in recent studies by Thompson, Kool, Fattet, Cho, and Remke, totaling 396 cases profiled on four different array platforms. In all datasets, SNCAIP exhibited highest expression in Group 4.

**a**

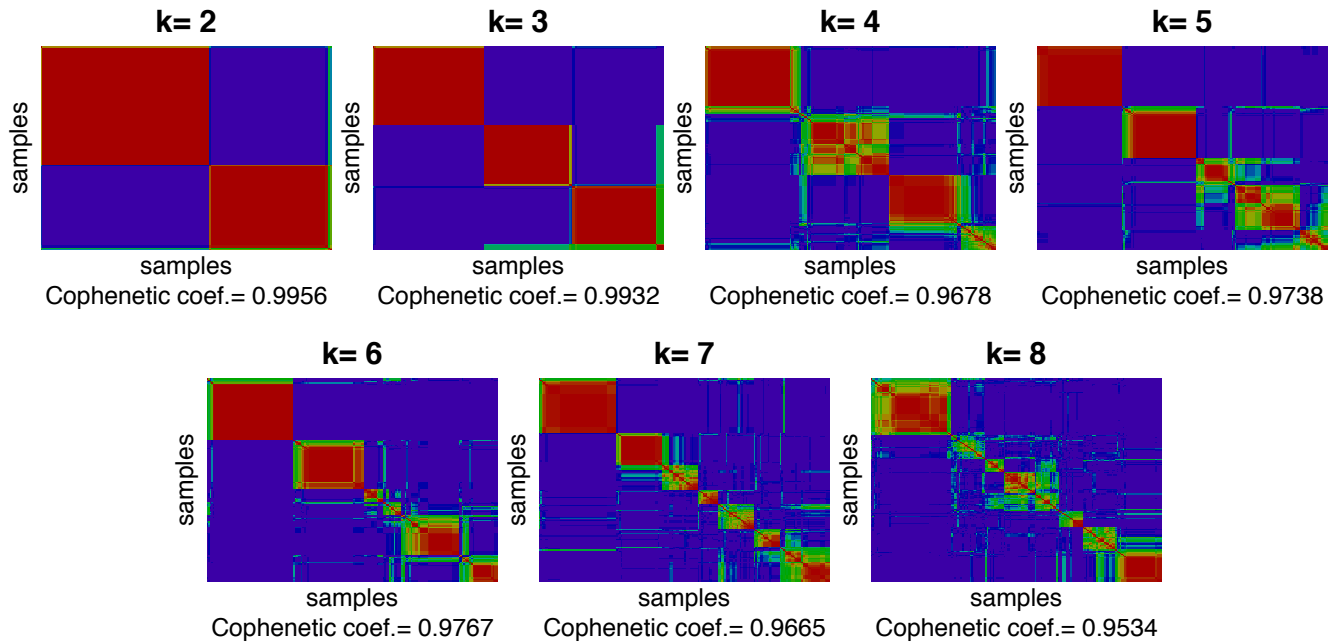

**b**

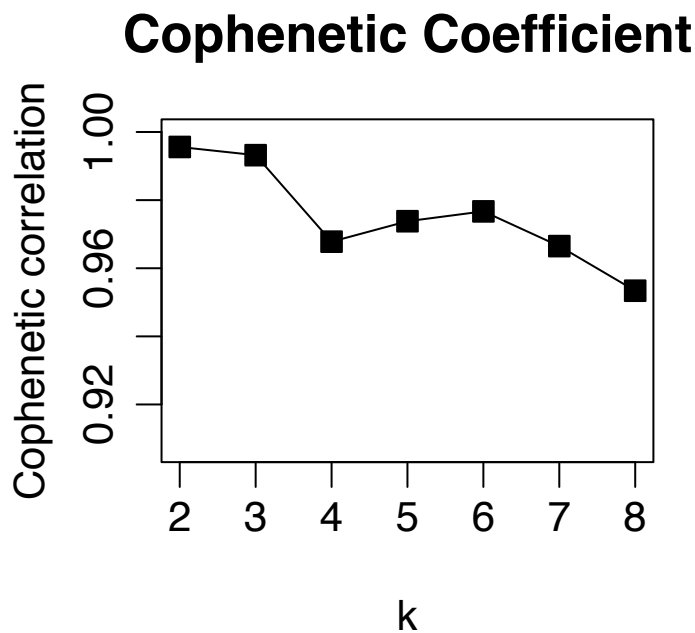

**c**

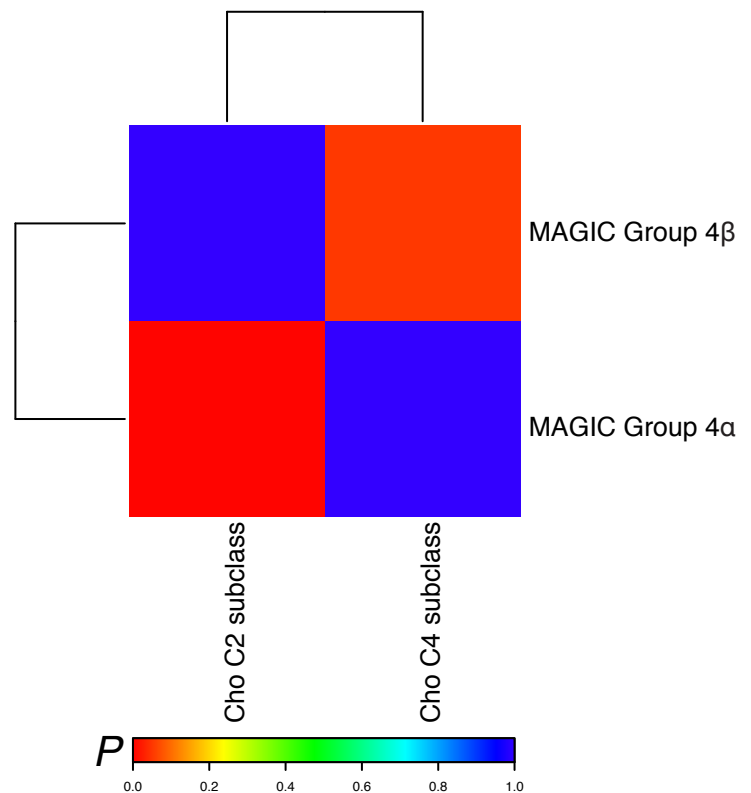

**Supplementary Figure 29. Identification of Group 4 medulloblastoma subtypes.** **a**, Consensus NMF clustering of Group 4 gene expression array data. 188 Group 4 medulloblastomas were profiled by Affymetrix Gene Array 1.1 and subjected to consensus clustering in GenePattern. Heatmaps for  $k=2-8$  are shown. **b**, Cophenetic Coefficient plot for the clustering results in **(a)** demonstrates the greatest support for  $k=2$  subtypes of Group 4. **c**, SubClass mapping results for Group 4 expression data. The two Group 4 subtypes (designated MAGIC Group 4 $\alpha$  and 4 $\beta$ ) identified in the current study were compared with the subtypes reported by Cho et al (C2 and C4). FDR matrix output by SubMap indicates Group 4 $\alpha$ =C2 and 4 $\beta$ =C4.

Group 4a (n=79)

**a**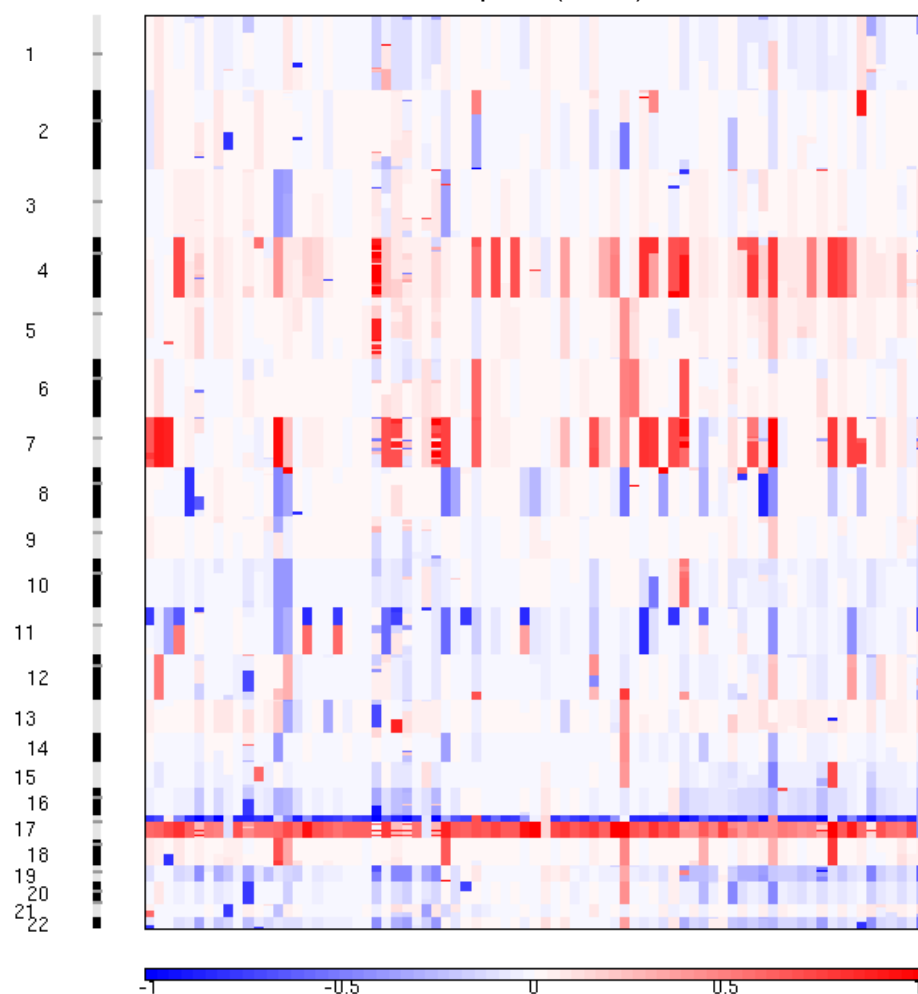**b**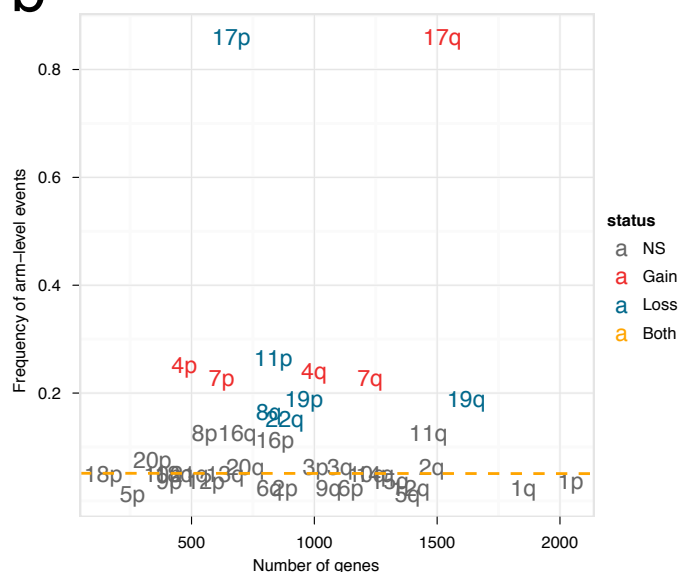**c**

Group 4a (n=79)

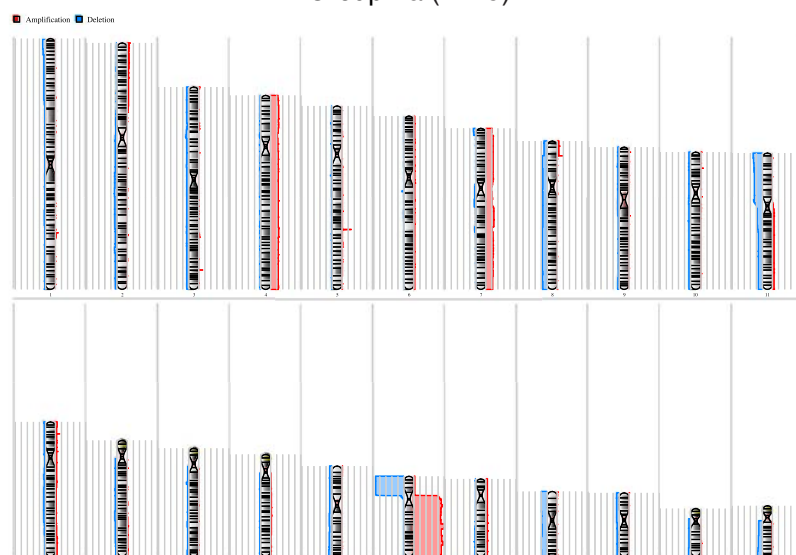

**Supplementary Figure 30. SNP6 copy number profile of Group 4a medulloblastoma. a**, Copy number heatmap for 79 Group 4a medulloblastomas profiled by SNP6. Amplifications are shown in red, deletions in blue. **b**, Broad cytogenetic events in Group 4a tumours. Significant chromosome arm-level gains are depicted in red, arm-level losses in blue. **c**, Summary plot of gains and losses in Group 4a medulloblastoma. Ideogram shows the relative distribution of broad gains (red) and losses (blue) across the 22 autosomes. Output from Partek Genomics Suite.

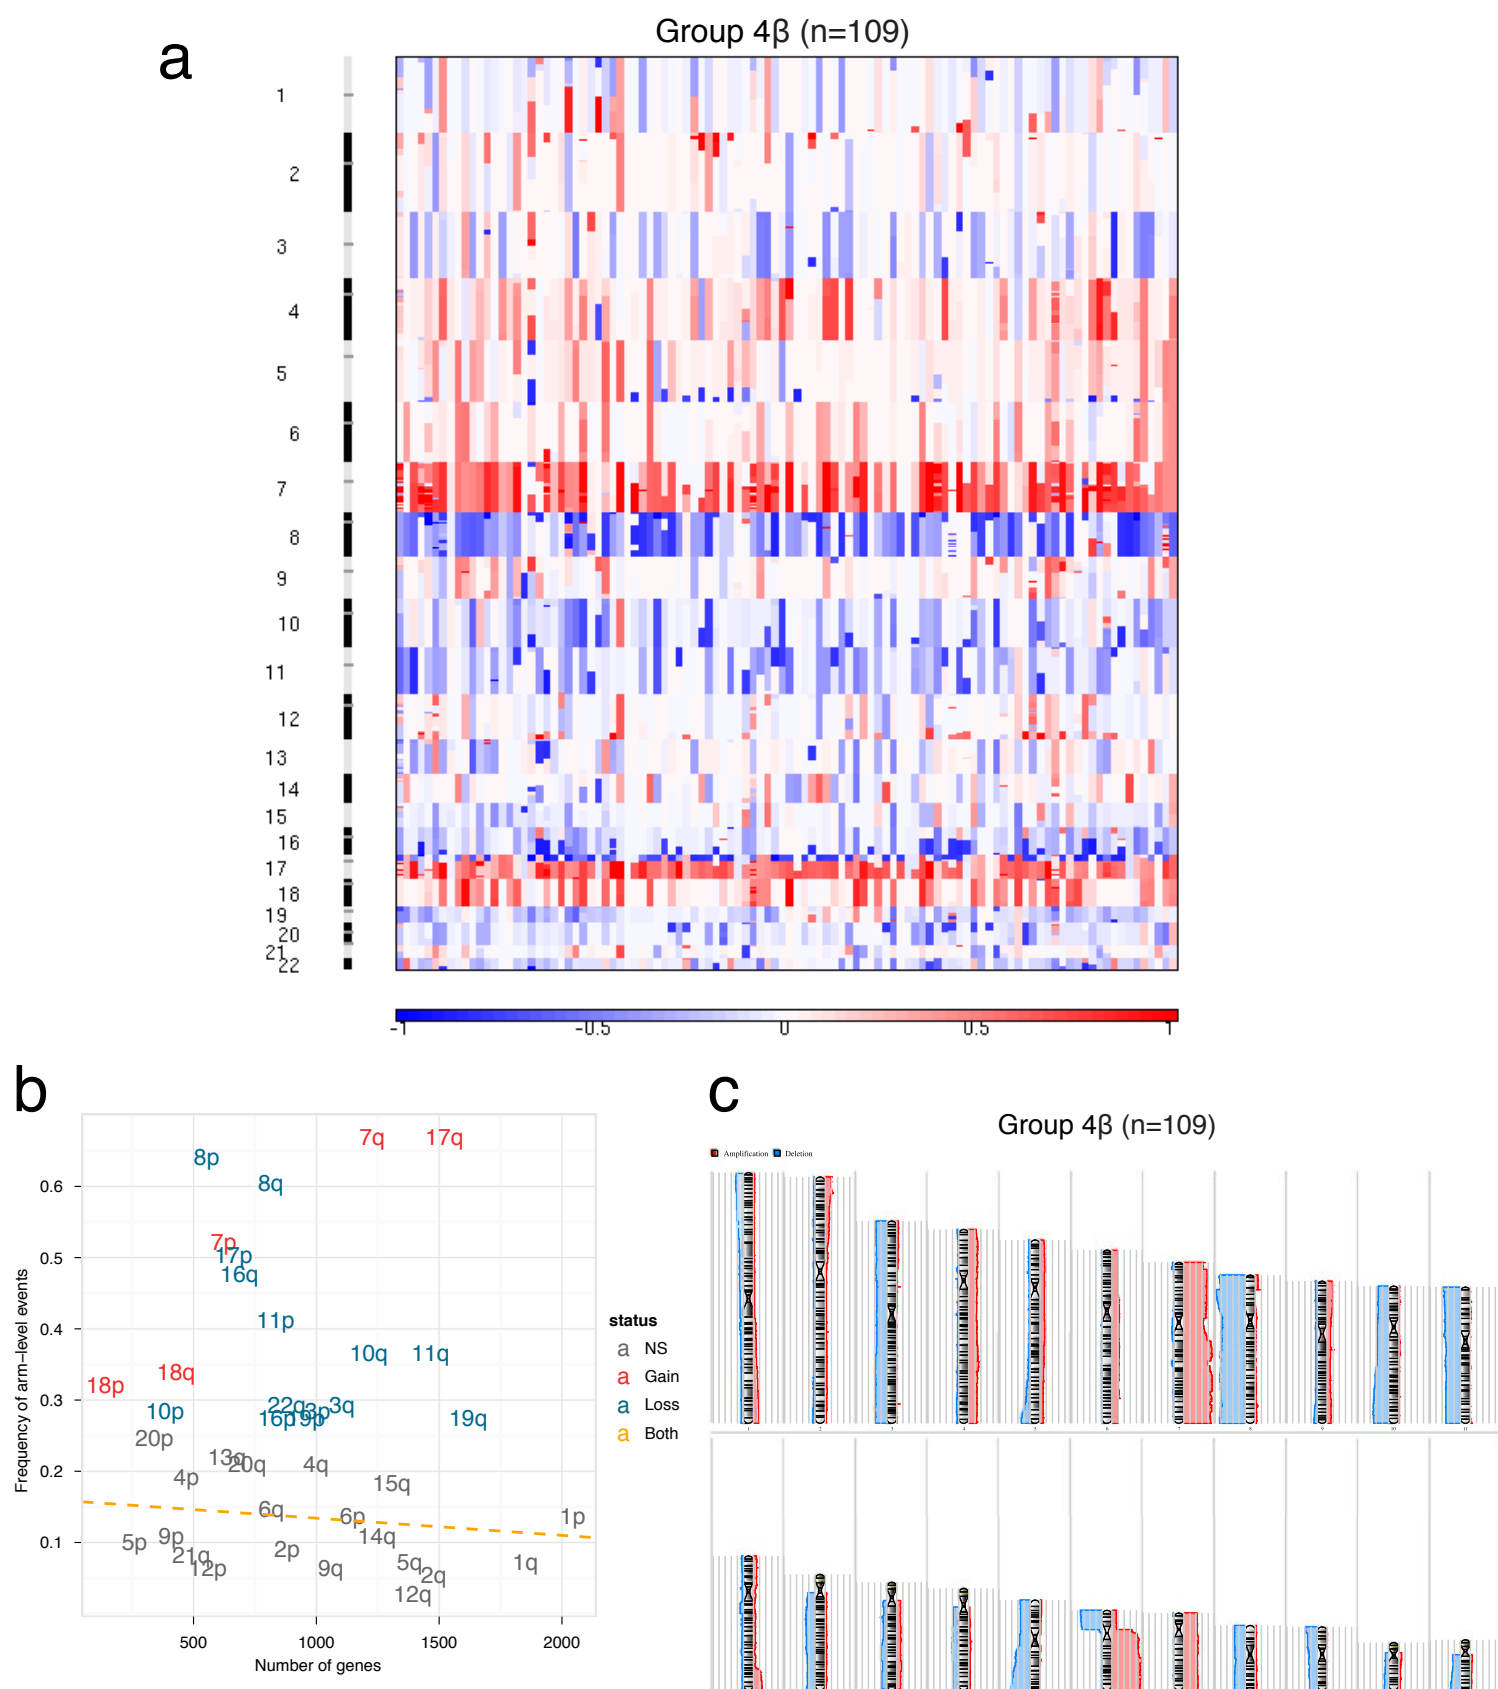

**Supplementary Figure 31. SNP6 copy number profile of Group 4 $\beta$  medulloblastoma.** **a**, Copy number heatmap for 109 Group 4 $\beta$  medulloblastomas profiled by SNP6. Amplifications are shown in red, deletions in blue. **b**, Broad cytogenetic events in Group 4 $\beta$  tumours. Significant chromosome arm-level gains are depicted in red, arm-level losses in blue. **c**, Summary plot of gains and losses in Group 4 $\beta$  medulloblastoma. Ideogram shows the relative distribution of broad gains (red) and losses (blue) across the 22 autosomes. Output from Partek Genomics Suite.

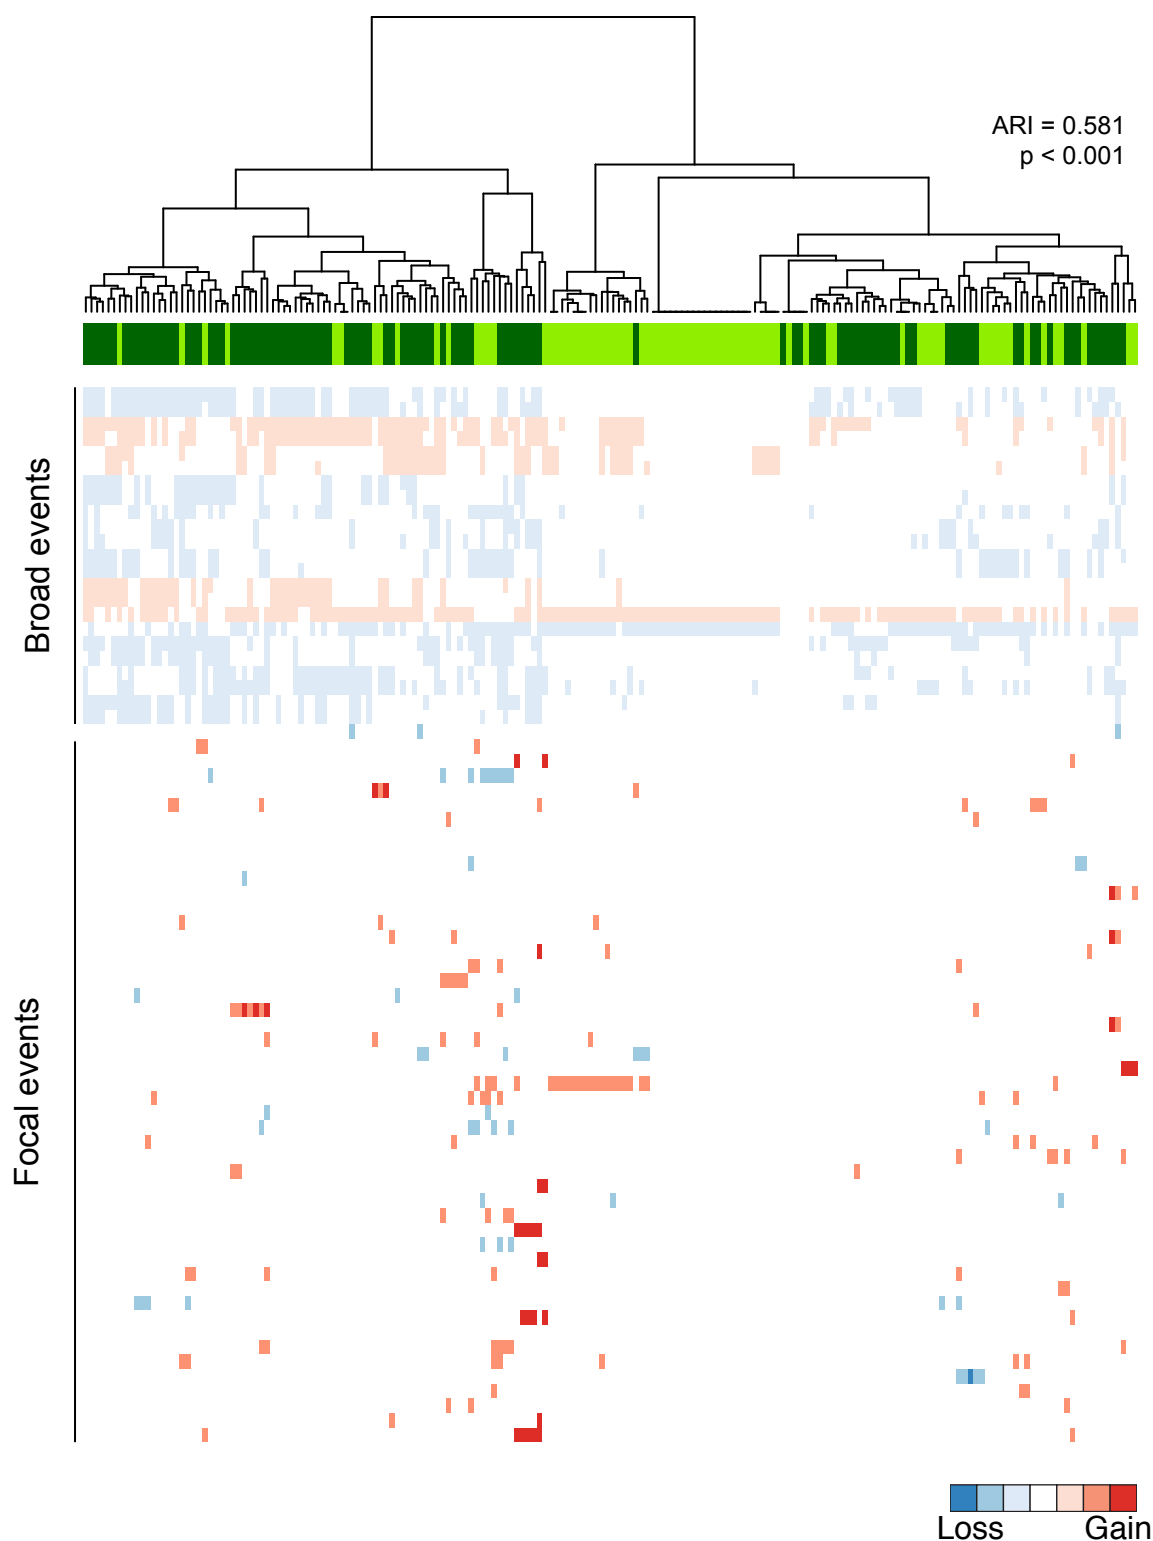

**Supplementary Figure 32. Unsupervised hierarchical clustering of broad and focal SCNAs in Group 4 medulloblastoma.** Coloured side bar indicates Group 4 subtypes (Group 4 $\alpha$ : light green, Group 4 $\beta$ : dark green). Only focal events identified in the pan-cohort GISTIC2 analysis were included in the clustering. Resulting clusters show significant agreement with known Group 4 expression subtypes (p < 0.001, Chi-squared test). ARI, Adjusted Rand Index.

Supplementary Figure 33, Northcott, Shih et al

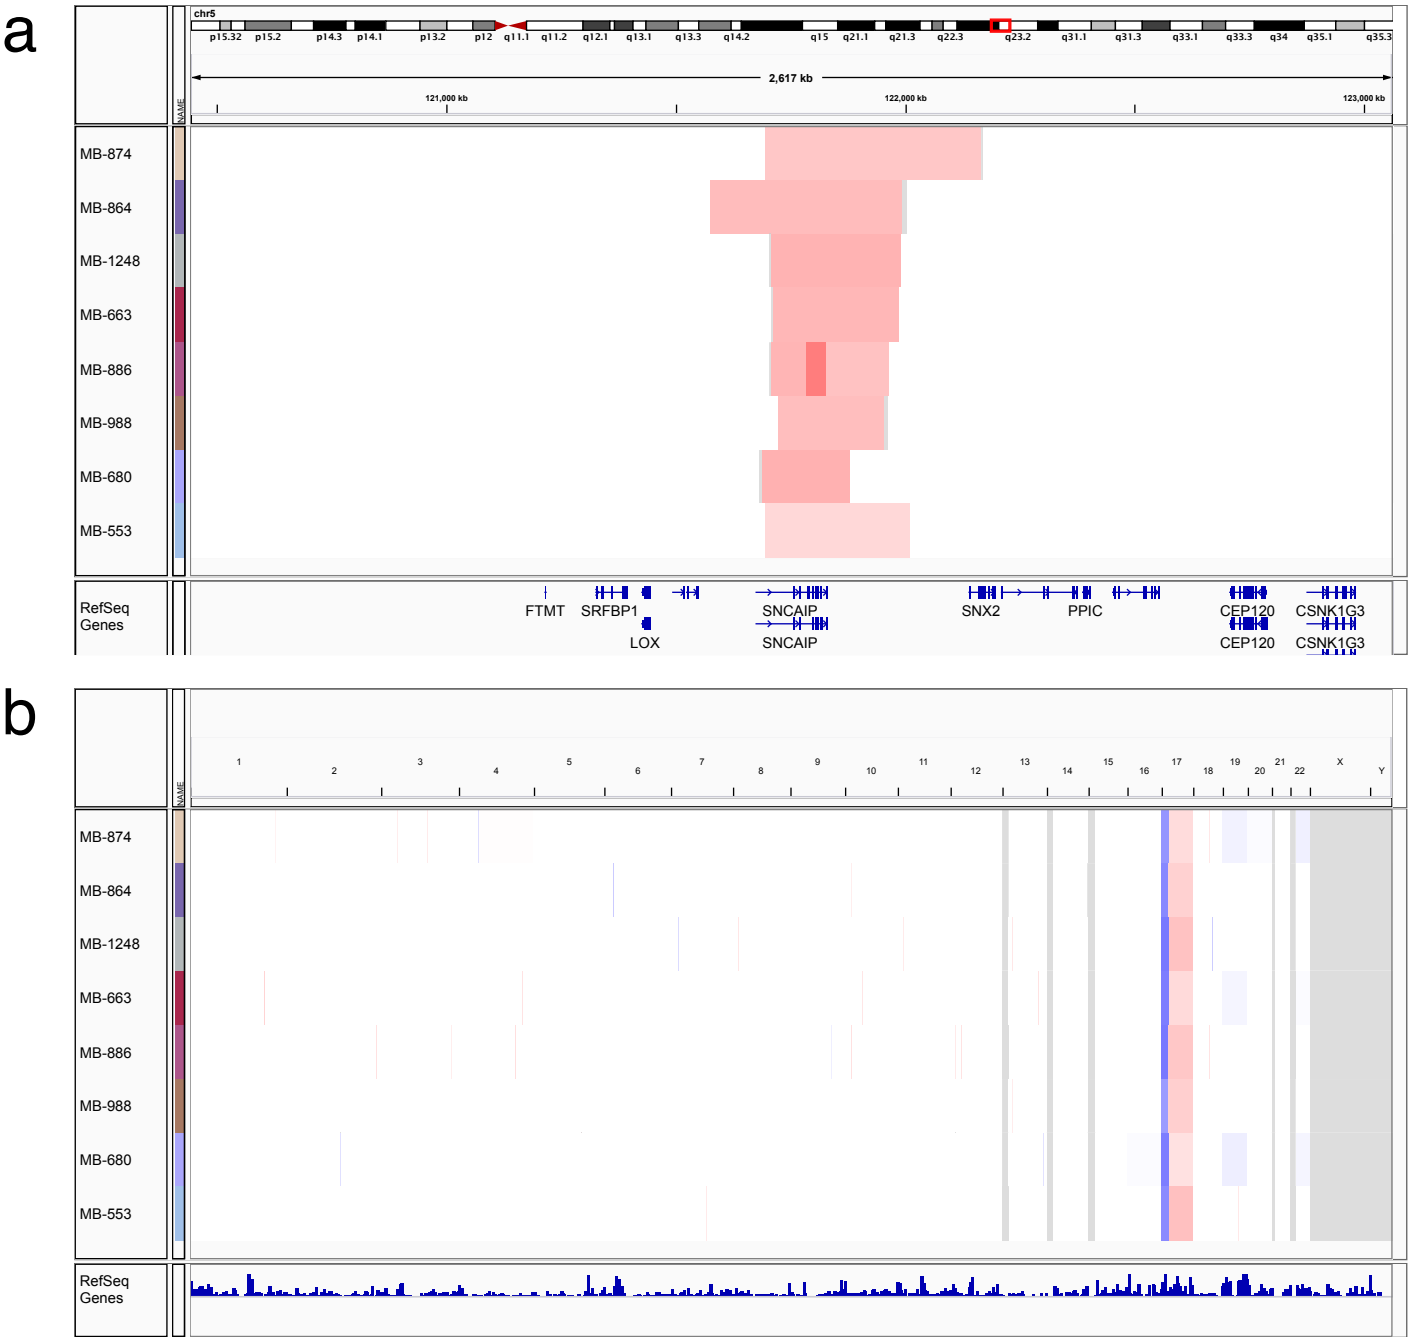

**Supplementary Figure 33. Cytogenetic profile of *SNCAIP* duplicated Group 4a medulloblastomas.** **a**, Copy number heatmap for a subset of Group 4a medulloblastomas (n=8) showing single copy gain of *SNCAIP* on chr5q23.2. Output from IGV. **b**, Genome-wide copy number heatmap for the same Group 4a cases shown in (a). Broad cytogenetic aberrations are exceedingly rare in these cases, with the exception of isochromosome 17q (i{17}q), which is common to all of them. Output from IGV.

Supplementary Figure 34, Northcott, Shih et al

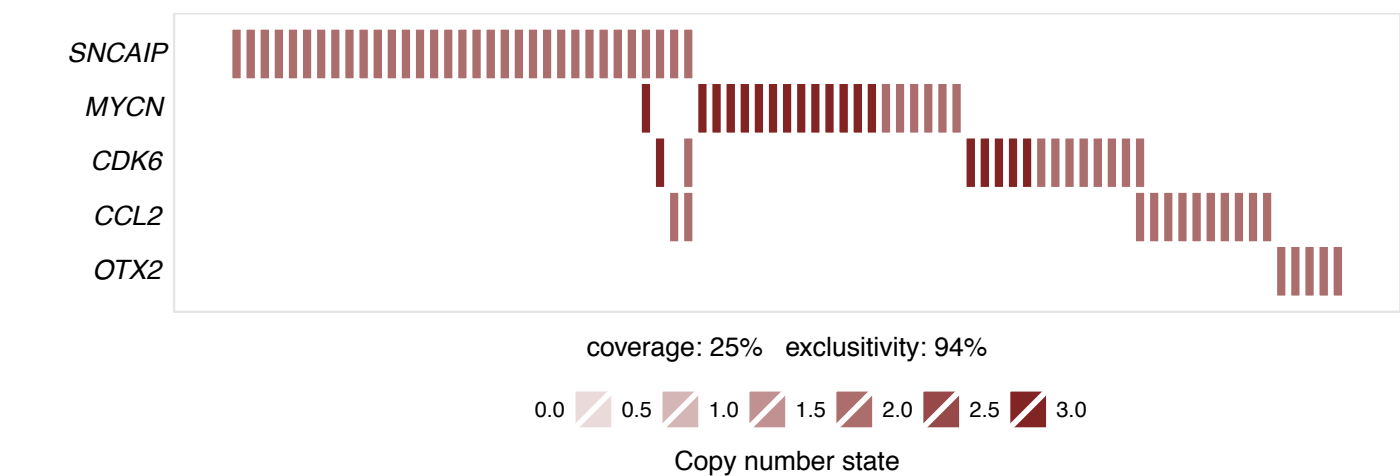

**Supplementary Figure 34. Mutual exclusivity analysis of focal SCNAs in Group 4 medulloblastoma.** Sample coverage plot shows the extent of overlap and/or exclusivity for top focal gains/amplifications in Group 4: *SNCAIP*, *MYCN*, *CDK6*, *CCL2*, and *OTX2*.

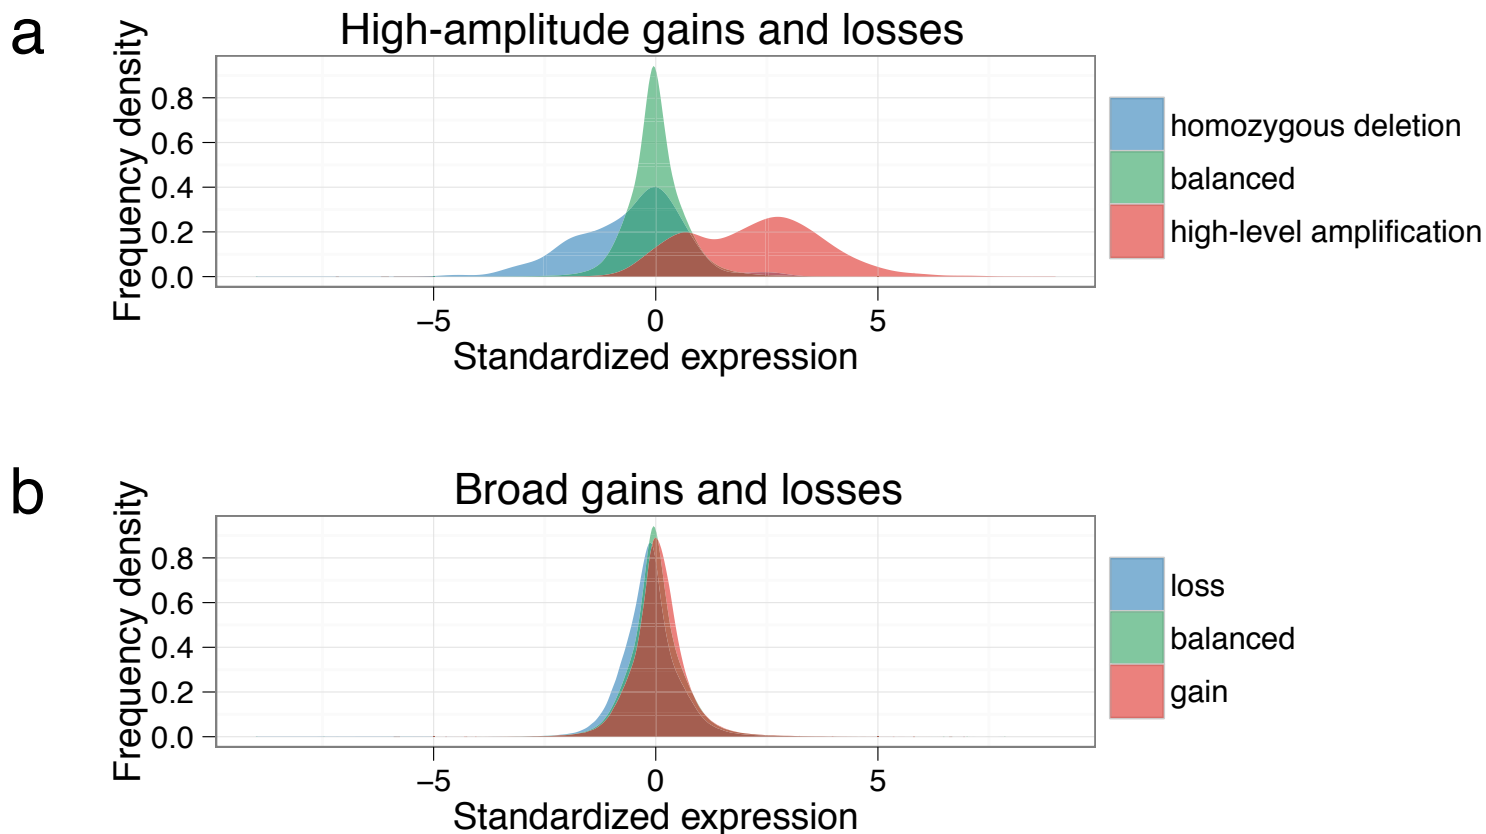

**Supplementary Figure 35. Global association of somatic copy number aberrations and gene expression.** **a**, Frequency density plot of gene expression within homozygous deletion regions, high-level amplification regions, or balanced regions. High-level amplified genes are significantly upregulated ( $p < 2.2E-16$ , Wilcoxon rank-sum test) and homozygously deleted genes are significantly downregulated ( $p < 2.2E-16$ ). **b**, Frequency density plot of gene expression within chromosome arm level gains or losses, or balanced regions. Genes within broad gains are significantly upregulated ( $p = 0.00012$ ) and genes within broad losses are significantly downregulated ( $p = 1.6E-08$ ).

a SHH

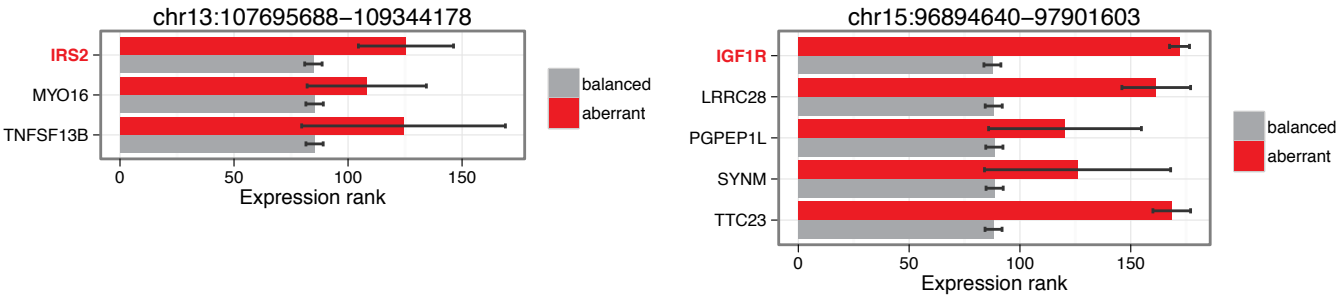

b Group 3

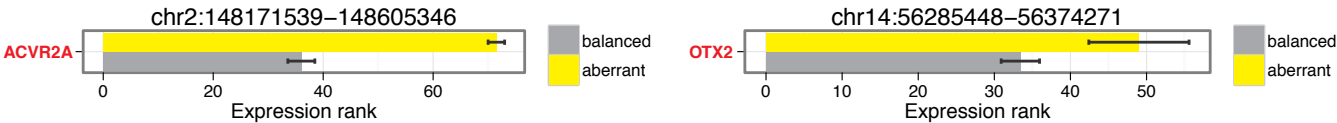

c Group 4

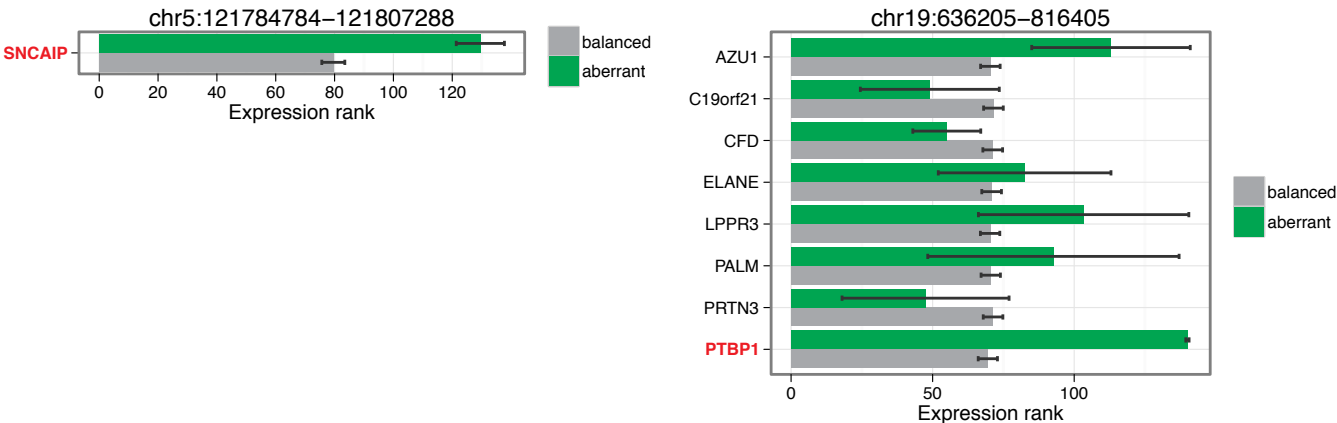

**Supplementary Figure 36. Expression of candidate target genes is driven by copy-number changes.** a-c, Bar plots depict expression of candidate genes from significant GISTIC2-amplified regions for (a) SHH, (b) Group 3, and (c) Group 4 medulloblastomas. Expression values of genes across samples were converted to ranks (increasing order) for the purpose of comparison by non-parametric tests between samples with balanced (gray) or aberrant (colours) copy number at each indicated locus. Error bars represent standard errors and reflect sample-to-sample variability in gene expression. Amplified genes exhibiting significantly (and consistently) upregulated expression are depicted in red (Mann-Whitney test with false discovery rate correction). False discovery rates were tuned by adaptive thresholds for each locus so that no false positives are expected by chance.

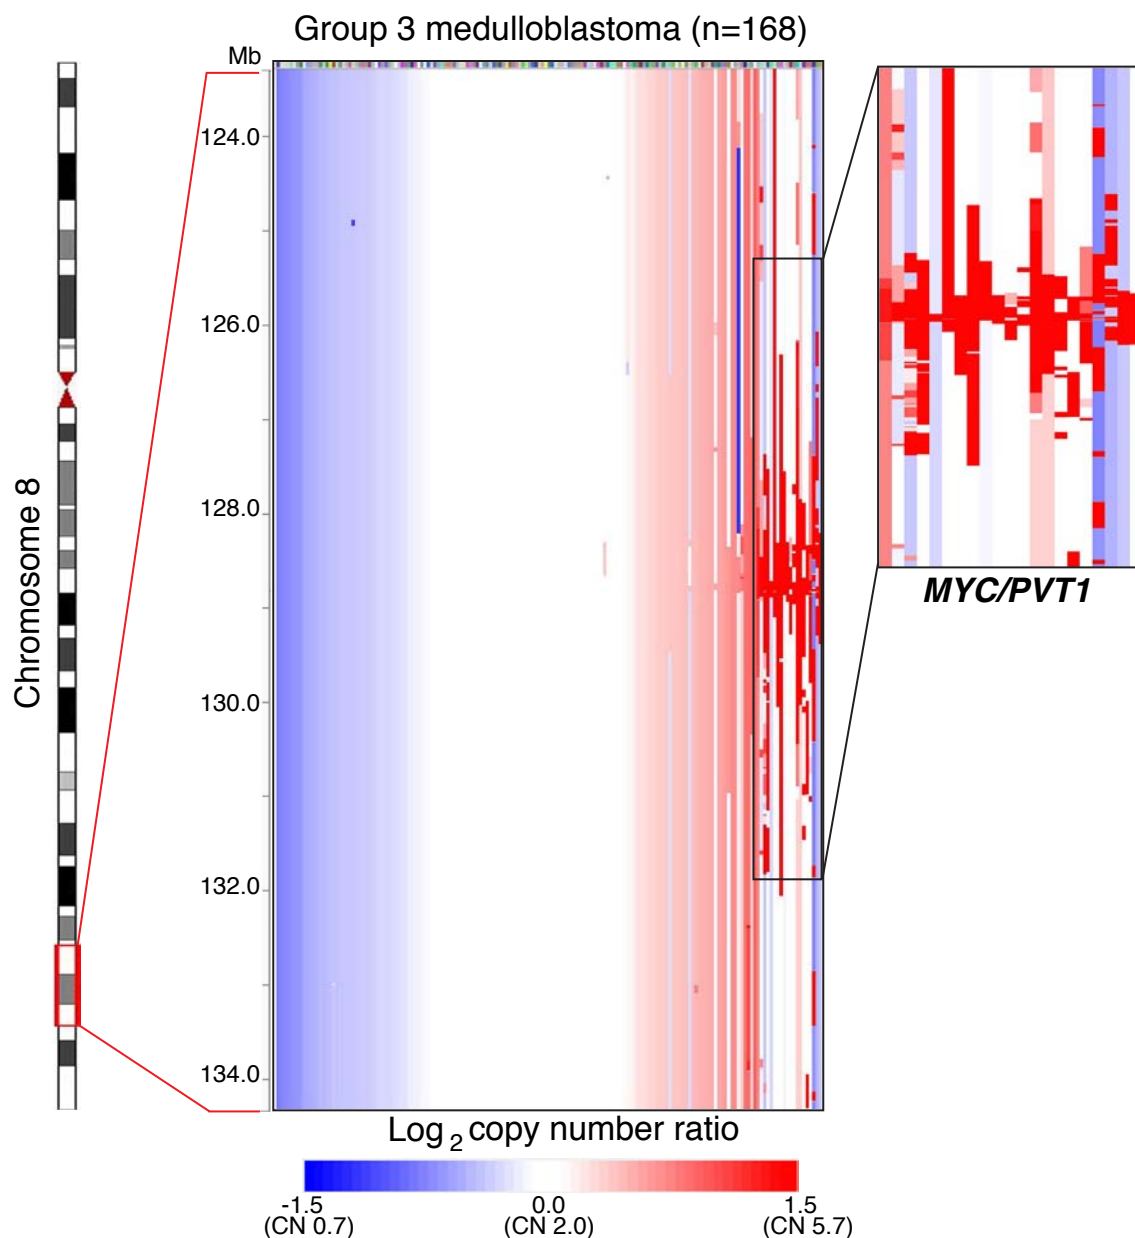

**Supplementary Figure 37. Co-amplification of *MYC* and *PVT1* in Group 3 medulloblastoma.** Copy number heatmap of 168 Group 3 cases demonstrating frequent high-level amplification of the *MYC* locus on chromosome 8q24.21. *MYC* is focally amplified in 28/168 (16.7%) Group 3 tumours. Notably, 20/28 (71.4%) *MYC*-amplified cases co-amplify the adjacent *PVT1* gene, either in part or in full.

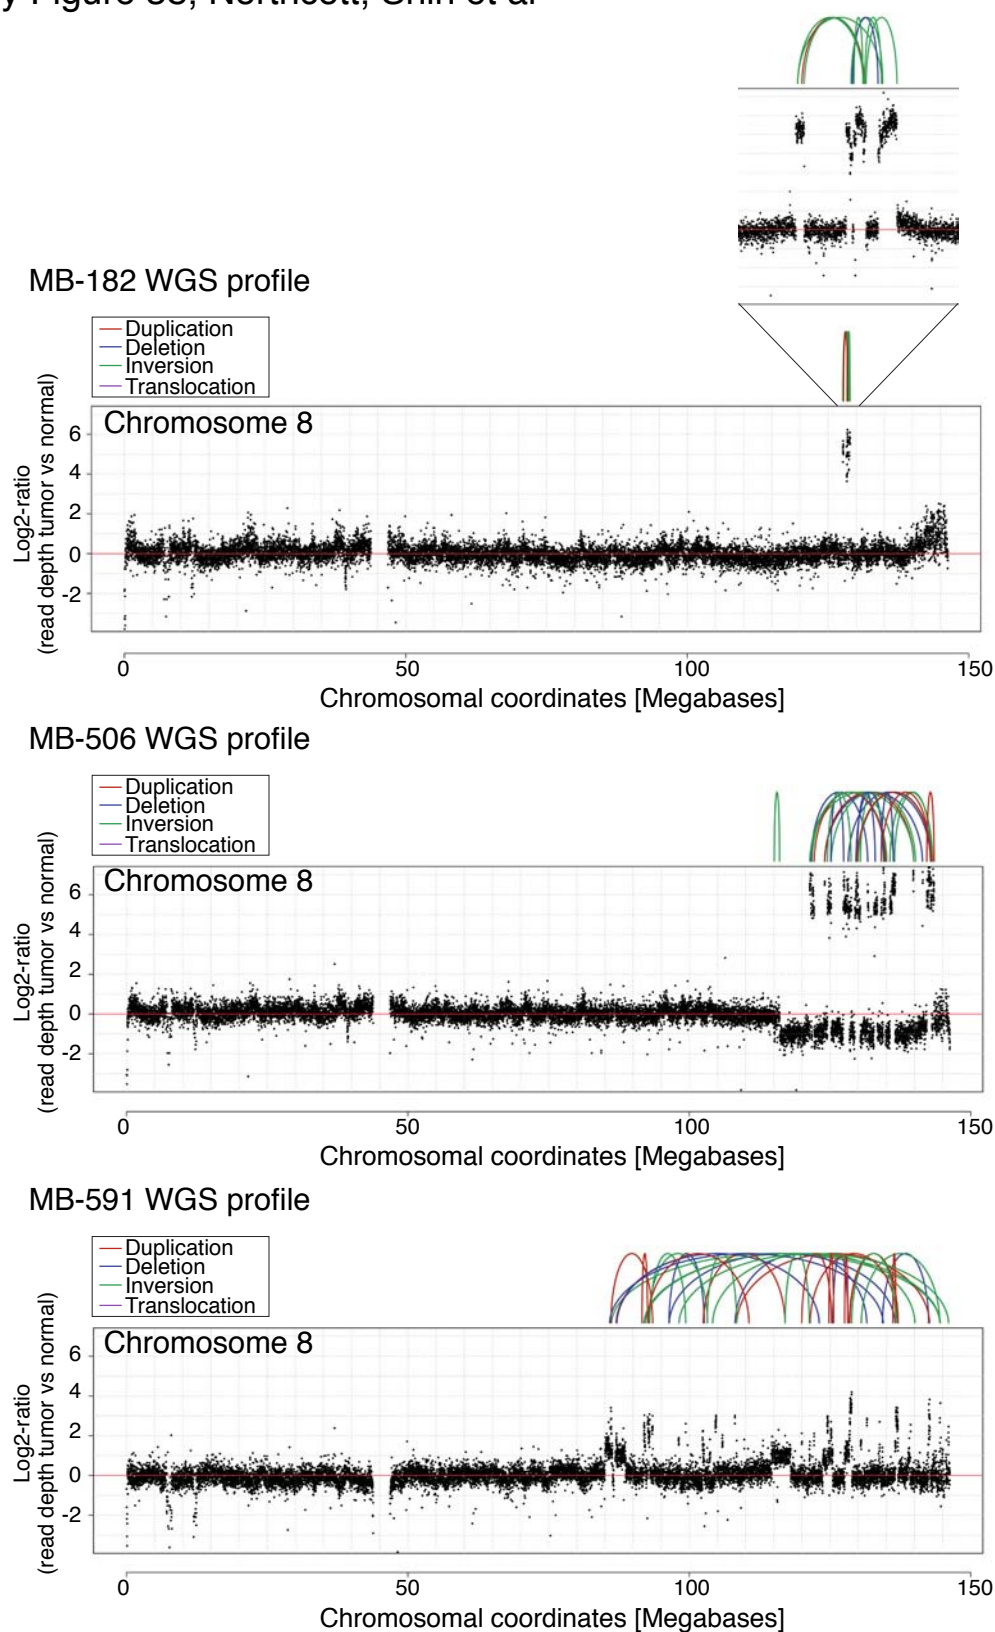

**Supplementary Figure 38. Recurrent chromothripsis on chromosome 8 in Group 3 medulloblastoma.** WGS confirms complex patterns of rearrangement on chromosome 8q24 in PVT1 fusion(+) Group 3 samples. Chromosome 8 copy number plots as estimated by read depth of tumour vs. a non-neoplastic control show extensive rearrangements consistent with chromothripsis in the highly amplified 8q24 region.

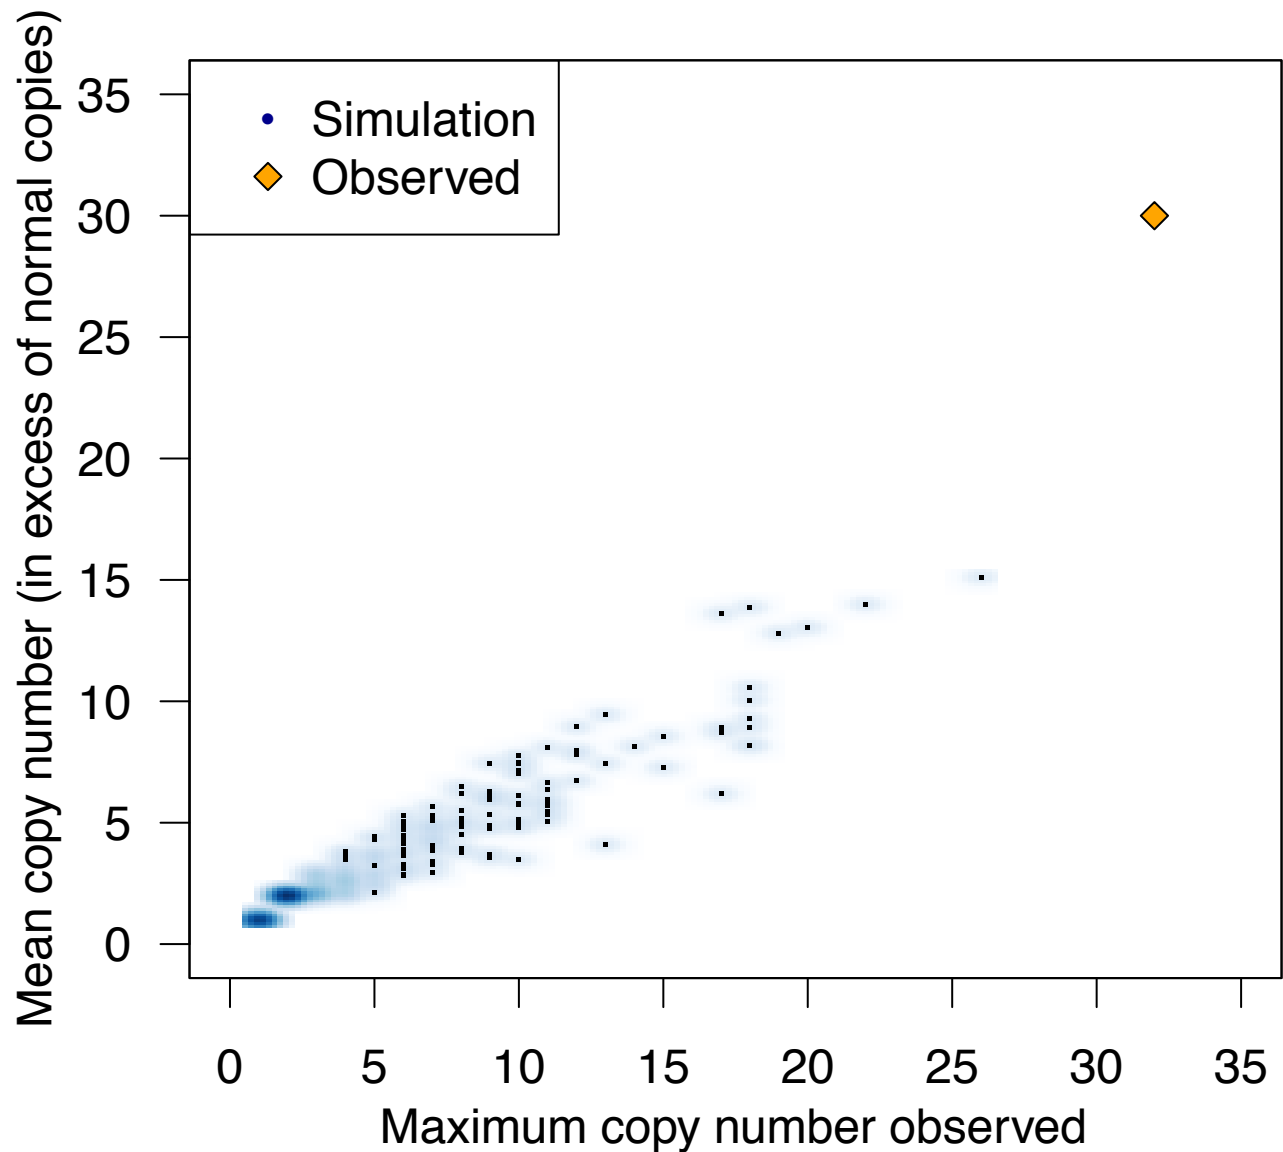

**Supplementary Figure 39. Simulation of progressive genomic rearrangements of chromosome 8.** Progressive rearrangements of chromosome 8 were simulated using the observed breakpoints. The mean copy number of amplified segments (y-axis) as well as the maximum copy number estimated in the simulations (x-axis) are distinct from the observed data.

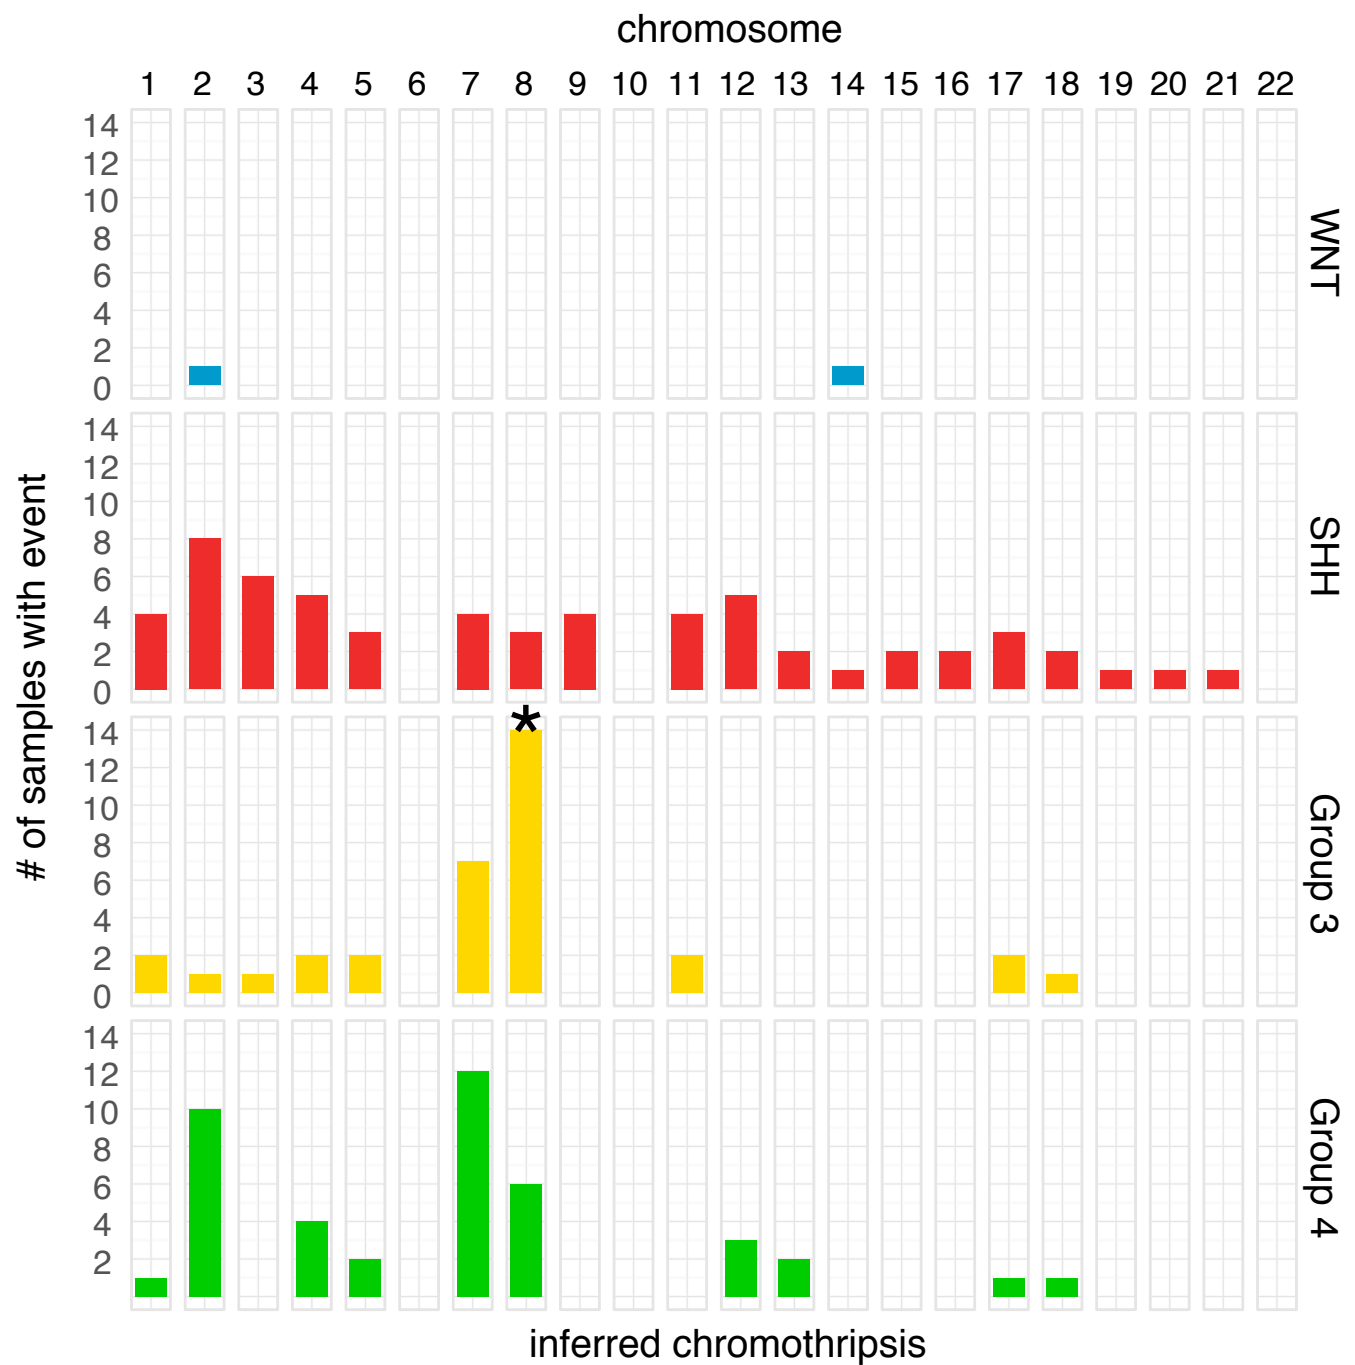

**Supplementary Figure 40. Chromosomal distribution of chromothripsis across medulloblastoma subgroups.** Quantification of chromothripsis by chromosome across medulloblastoma subgroups confirms a significant enrichment of chromothripsis on chromosome 8 in Group 3 ( $q=0.0004$ ). Samples showing at least 10 copy number state changes on a single chromosome were considered to have undergone chromothripsis.

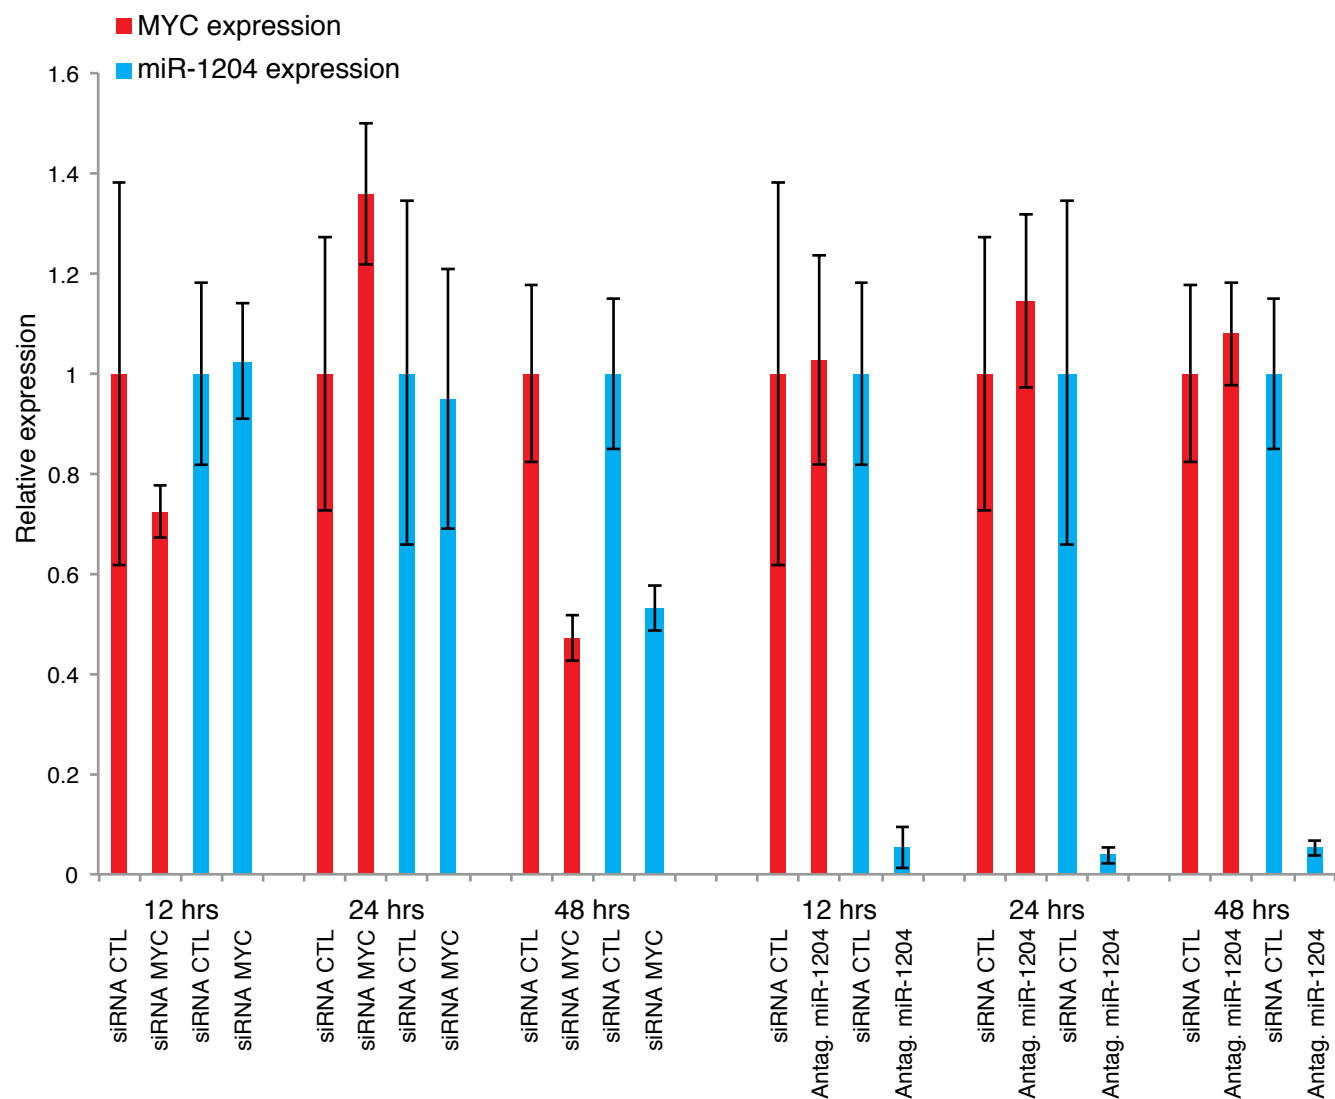

**Supplementary Figure 41. Verification of MYC and miR-1204 knockdown in MED8A cells.** Quantitative RT-PCR of MED8A cells transfected with either siRNA control, siRNA-MYC, or antagomiR against miR-1204 verifies inhibition of the genes of interest. MYC knockdown results in inhibition of both MYC and miR-1204. Error bars represent SEM of duplicate experiments.

---

**Supplementary Table 1. Summary of MAGIC SNP6 array profiling**


---

|                                                                           |              |
|---------------------------------------------------------------------------|--------------|
| <b>I) SNP6 hybridizations</b>                                             | <b>1239</b>  |
| i) Presumed primary medulloblastomas                                      | <b>1228</b>  |
| ii) Presumed medulloblastoma cell lines                                   | <b>11</b>    |
| <b>II) Quality control</b>                                                |              |
| Average SNP QC-call-rate (%)                                              | 97.54        |
| Median SNP QC-call-rate (%)                                               | 97.92        |
| SNP QC-call-rate range (%)                                                | 85.67–99.40  |
| Average contrast-QC                                                       | 2.664        |
| Median contrast-QC                                                        | 2.698        |
| Contrast-qc range                                                         | -0.096–3.854 |
| Average MAPD score                                                        | 0.252        |
| Median MAPD score                                                         | 0.248        |
| MAPD score range                                                          | 0.189–0.406  |
| <b>Samples that failed QC (SNP qc-call-rate, contrast-qc, MAPD score)</b> | <b>12</b>    |
| <b>III) Genotype concordance</b>                                          |              |
| <b>Samples with duplicate genotypes</b>                                   | <b>95</b>    |
| i) Samples hybridized 2x                                                  | 81           |
| ii) Samples hybridized 3x                                                 | 7            |
| iii) Relapses/metastases profiled with matched primary                    | 22           |
| iv) Xenografts/cell lines profiled with matched primary                   | 5            |
| <b>Unique samples available for analysis post-QC</b>                      | <b>1132</b>  |
| i) Presumed primary medulloblastomas                                      | 1123         |
| ii) Presumed medulloblastoma cell lines                                   | 9            |
| <b>IV) Integration of clinical details</b>                                |              |
| <b>Samples eliminated via clinical details/genetics</b>                   | <b>36</b>    |
| i) PNET                                                                   | 8            |
| ii) Ependymoma                                                            | 6            |
| iii) Medullomyoblastoma                                                   | 6            |
| iv) ATRT                                                                  | 5            |
| v) Melanotic medulloblastoma                                              | 2            |
| vi) Medulloepithelioma                                                    | 1            |
| vii) Glioblastoma multiforme                                              | 1            |
| viii) ETANTR (chr19q amplicon)                                            | 3            |
| ix) Relapsed/metastatic medulloblastomas (no primary available)           | 3            |
| x) Cell line                                                              | 1            |
| <b>V) Final set of unique MB samples for MAGIC</b>                        | <b>1097</b>  |
| i) Final set of unique primary medulloblastomas for MAGIC                 | <b>1087</b>  |
| ii) Final set of unique medulloblastoma cell lines for MAGIC              | <b>10</b>    |

---

**Supplementary Table 2. Clinical features of the MAGIC cohort**

| Variable                           | WNT      | SHH      | Group 3 | Group 4  | All MAGIC |
|------------------------------------|----------|----------|---------|----------|-----------|
| Number of patients                 | 76       | 266      | 168     | 317      | 1087      |
| Frequency in cohort (%)            | 9.19     | 32.16    | 20.31   | 38.33    | N/A       |
| <b>Gender (count)</b>              |          |          |         |          |           |
| Male                               | 34       | 146      | 105     | 224      | 665       |
| Female                             | 41       | 106      | 56      | 82       | 374       |
| Male:female ratio                  | 0.83:1   | 1.38:1   | 1.88:1  | 2.73:1   | 1.78:1    |
| <b>Gender (%)</b>                  |          |          |         |          |           |
| Male                               | 45.33    | 57.94    | 65.22   | 73.20    | 64.00     |
| Female                             | 54.67    | 42.06    | 34.78   | 26.80    | 36.00     |
| <b>Age (years)</b>                 |          |          |         |          |           |
| Average                            | 11.7     | 13.2     | 6.4     | 9.2      | 9.7       |
| Median                             | 10.0     | 7.6      | 5.6     | 8.4      | 8.0       |
| Range                              | 2.0–56.3 | 0.1–52.0 | 0.6–29  | 1.0–36.0 | 0.1–56.3  |
| <b>Age category (%)</b>            |          |          |         |          |           |
| Infants (≤3)                       | 2.67     | 36.08    | 24.53   | 6.84     | 20.35     |
| Children (4–15)                    | 78.67    | 33.33    | 72.33   | 85.99    | 66.06     |
| Adults (≥16)                       | 18.67    | 30.59    | 3.14    | 7.17     | 13.60     |
| <b>Histological subtype (%)</b>    |          |          |         |          |           |
| Classic                            | 86.96    | 51.40    | 68.38   | 84.31    | 71.68     |
| Desmoplastic/MBEN                  | 5.80     | 35.51    | 11.03   | 7.66     | 16.92     |
| LCA                                | 7.25     | 13.08    | 20.59   | 8.03     | 11.39     |
| <b>Metastatic stage (%)</b>        |          |          |         |          |           |
| M0                                 | 88.46    | 80.90    | 57.27   | 59.49    | 68.27     |
| M+                                 | 11.54    | 19.10    | 42.73   | 40.51    | 31.73     |
| <b>5-year overall survival (%)</b> |          |          |         |          |           |
| All ages                           | 97.22    | 70.58    | 59.99   | 69.42    | 69.67     |
| Infants (≤3)                       | 100.00   | 71.71    | 38.70   | 38.03    | 60.35     |
| Children (4–15)                    | 100.00   | 65.07    | 65.65   | 71.10    | 71.28     |
| Adults (≥16)                       | 90.00    | 75.73    | 60.00   | 74.29    | 75.22     |

**Supplementary Table 6. Driver genes in medulloblastoma subgroups**

| Cytoband       | Peak limits     | # genes in peak | Candidate driver(s)      | <i>q</i> value | Subgroup incidence | High-level amplification? | Subgroup enriched? |
|----------------|-----------------|-----------------|--------------------------|----------------|--------------------|---------------------------|--------------------|
| <b>SHH</b>     |                 |                 |                          |                |                    |                           |                    |
| 2p24.3         | 15.965-16.011   | 2               | <i>MYCN</i>              | 4.51E-28       | 8.2%               | Yes                       | No                 |
| 2q14.2         | 121.169-121.502 | 1               | <i>GLI2</i>              | 3.05E-13       | 5.2%               | Yes                       | Yes                |
| 12p13.32       | 4.088-4.301     | 2               | <i>CCND2</i>             | 1.27E-06       | 3.4%               | Yes                       | No                 |
| 6q24.3         | 146.260-146.263 | 1               | <i>SHPRH</i>             | 3.00E-02       | 3.4%               | No                        | No                 |
| 17q23.2        | 55.878-56.410   | 3               | <i>PPM1D</i>             | 9.56E-06       | 2.2%               | Yes                       | Yes                |
| 1p34.2         | 39.994-40.275   | 6               | <i>MYCL1</i>             | 1.25E-04       | 2.2%               | Yes                       | Yes                |
| 15q26.3        | 96.895-97.902   | 6               | <i>IGF1R</i>             | 3.07E-02       | 2.2%               | Yes                       | Yes                |
| 1q32.1         | 202.018-202.796 | 14              | <i>MDM4, PIK3C2B</i>     | 7.37E-03       | 1.9%               | Yes                       | Yes                |
| 13q33.3        | 107.696-109.344 | 3               | <i>IRS2</i>              | 2.08E-02       | 1.9%               | Yes                       | Yes                |
| 3p22.2         | 37.234-38.566   | 18              | <i>ACVR2B</i>            | 8.37E-03       | 1.9%               | Yes                       | No                 |
| 11q22.1        | 101.471-101.502 | 1               | <i>YAP1</i>              | 3.23E-04       | 1.5%               | Yes                       | Yes                |
| 12p12.1        | 21.334-21.515   | 4               | <i>IAPP</i>              | 9.84E-02       | 1.5%               | Yes                       | Yes                |
| 7q21.2         | 91.870-92.443   | 7               | <i>CDK6</i>              | 7.37E-03       | 1.5%               | Yes                       | No                 |
| 17p11.2        | 17.199-21.968   | 69              | <i>Unknown</i>           | 3.95E-02       | 1.1%               | Yes                       | Yes                |
| 6p21.2         | 37.296-37.405   | 2               | <i>TBC1D22B, TMEM217</i> | 8.26E-02       | 1.1%               | Yes                       | Yes                |
| 1p22.3         | 86.700-87.635   | 9               | <i>LMO4</i>              | 9.39E-02       | 1.1%               | Yes                       | Yes                |
| <b>Group 3</b> |                 |                 |                          |                |                    |                           |                    |
| 8q24.21        | 128.809-128.832 | 1               | <i>MYC</i>               | 3.54E-33       | 16.7%              | Yes                       | Yes                |
| 8q24.21        | 129.005-129.315 | 5               | <i>PVT1</i>              | 2.78E-04       | 11.9%              | Yes                       | Yes                |
| 14q23.1        | 56.285-56.374   | 2               | <i>OTX2</i>              | 7.31E-03       | 7.7%               | No                        | Yes                |
| 6q24.3         | 146.256-146.266 | 1               | <i>SHPRH</i>             | 8.66E-02       | 6.0%               | No                        | Yes                |
| 1q41           | 214.921-214.948 | 1               | <i>ESRRG</i>             | 9.51E-02       | 4.2%               | No                        | Yes                |
| 14q32.31       | 100.451-100.479 | 7               | <i>SNORD113-1/7</i>      | 8.07E-02       | 3.6%               | No                        | Yes                |
| 7q21.2         | 91.330-92.398   | 13              | <i>CDK6</i>              | 2.40E-03       | 3.0%               | Yes                       | No                 |
| 2p24.3         | 15.909-16.095   | 2               | <i>MYCN</i>              | 2.30E-05       | 2.4%               | Yes                       | No                 |
| 2q22.3         | 148.172-148.605 | 3               | <i>ACVR2A</i>            | 8.68E-05       | 2.4%               | Yes                       | Yes                |
| 9q22.33        | 100.898-101.028 | 3               | <i>TGFBR1</i>            | 7.28E-02       | 2.4%               | Yes                       | Yes                |
| 3p22.2         | 38.357-38.754   | 6               | <i>ACVR2B</i>            | 2.44E-02       | 1.2%               | Yes                       | No                 |
| 8q21.2         | 86.242-86.343   | 3               | <i>E2F5</i>              | 9.51E-02       | 1.2%               | Yes                       | Yes                |
| <b>Group 4</b> |                 |                 |                          |                |                    |                           |                    |
| 5q23.2         | 121.785-121.807 | 1               | <i>SNCAIP</i>            | 1.10E-14       | 10.4%              | No                        | Yes                |
| 2p24.3         | 15.980-16.013   | 2               | <i>MYCN</i>              | 4.14E-32       | 6.3%               | Yes                       | No                 |
| 7q21.2         | 92.016-92.328   | 3               | <i>CDK6</i>              | 1.41E-22       | 4.7%               | Yes                       | Yes                |
| 3p22.1         | 41.249-41.254   | 1               | <i>CTNNB1</i>            | 2.66E-02       | 2.8%               | No                        | Yes                |
| 6q24.3         | 146.260-146.266 | 1               | <i>SHPRH</i>             | 1.89E-04       | 2.8%               | No                        | No                 |
| 12p13.32       | 4.205-5.249     | 13              | <i>CCND2</i>             | 2.54E-05       | 2.8%               | Yes                       | No                 |
| 14q23.1        | 56.339-56.793   | 3               | <i>OTX2</i>              | 7.00E-02       | 2.2%               | No                        | No                 |
| 3p22.2         | 38.346-38.530   | 4               | <i>ACVR2B</i>            | 1.45E-03       | 1.9%               | Yes                       | No                 |
| 7q21.11        | 84.586-84.602   | 1               | <i>SEMA3D</i>            | 7.68E-04       | 1.9%               | Yes                       | Yes                |
| 1q41           | 214.939-214.948 | 1               | <i>ESRRG</i>             | 6.66E-02       | 1.3%               | No                        | No                 |
| 8q24.21        | 128.792-128.856 | 1               | <i>MYC</i>               | 2.49E-03       | 1.3%               | Yes                       | No                 |
| 19p13.3        | 0.636-0.816     | 11              | <i>Unknown</i>           | 2.85E-04       | 0.9%               | Yes                       | Yes                |
| 8p11.21        | 41.015-43.943   | 26              | <i>KAT6A</i>             | 3.05E-02       | 0.6%               | Yes                       | Yes                |

**Supplementary Table 8. WNT GISTIC Regions: Amplifications**

| Cytoband | Peak Limits   | Size (Kbp) | GISTIC <i>q</i> -value | CMDS | # genes | Key candidate(s)     |
|----------|---------------|------------|------------------------|------|---------|----------------------|
| 14q23.1  | 56.244-56.372 | 128.20     | 0.043587               | No   | 2       | <i>OTX2</i>          |
| 18q23    | 76.064-76.117 | 52.76      | 0.094307               | No   | 1       | <i>PARD6G</i>        |
| 21q22.11 | 34.398-34.401 | 3.49       | 0.0081927              | No   | 2       | <i>MRPS6, SLC5A3</i> |

**Supplementary Table 9: *CTNNB1* mutation and chr6 loss in WNT medulloblastoma**

| Sample ID | Exon 3 Mutation |            | Chromosome 6 Status |          |
|-----------|-----------------|------------|---------------------|----------|
|           | Codon           | Amino Acid | p arm               | q arm    |
| MB-15     | GGA → GAA       | G34E       | loss                | loss     |
| MB-18     | GAC → AAC       | D32N       | loss                | loss     |
| MB-128    | GGA → GAA       | G34E       | loss                | loss     |
| MB-145    | GAC → TAC       | D32Y       | loss                | loss     |
| MB-147    | TCT → TGT       | S33C       | loss                | loss     |
| MB-178    | GGA → AGA       | G34R       | loss                | loss     |
| MB-190    | GAC → TAC       | D32Y       | balanced            | balanced |
| MB-191    | GGA → GAA       | G34E       | loss                | loss     |
| MB-301    | GAC → AAC       | D32N       | loss                | loss     |
| MB-302    | GAC → AAC       | D32N       | loss                | loss     |
| MB-303    | TCT → CCT       | S37P       | loss                | loss     |
| MB-307    | GAC → AAC       | D32N       | loss                | loss     |
| MB-328    | TCT → TTT       | S37F       | loss                | loss     |
| MB-336    | GGA → GAA       | G34E       | loss                | loss     |
| MB-361    | GAC → GTC       | D32V       | loss                | loss     |
| MB-401    | GAC → AAC       | D32N       | loss                | loss     |
| MB-407    | TCT → TTT       | S45F       | balanced            | balanced |
| MB-408    | TCT → TAT       | S37Y       | balanced            | balanced |
| MB-416    | GAC → TAC       | D32Y       | loss                | loss     |
| MB-418    | TCT → TGT       | S33C       | loss                | loss     |
| MB-449    | TCT → TGT       | S37C       | balanced            | balanced |
| MB-455    | GAC → TAC       | D32Y       | loss                | loss     |
| MB-496    | GGA → AGA       | G34R       | loss                | loss     |
| MB-498    | TCT → TGT       | S33C       | loss                | loss     |
| MB-502    | GGA → AGA       | G34R       | loss                | loss     |
| MB-505    | TCT → TGT       | S33C       | loss                | loss     |
| MB-520    | TCT → TTT       | S33F       | balanced            | balanced |
| MB-521    | TCT → TGT       | S33C       | balanced            | loss     |
| MB-662    | GGA → GAA       | G34E       | loss                | loss     |
| MB-670    | GGA → GAA       | G34E       | loss                | loss     |
| MB-695    | TCT → TAT       | S37Y       | loss                | loss     |
| MB-701    | GAC → GGC       | D32G       | loss                | loss     |
| MB-719    | TCT → TAT       | S37Y       | balanced            | loss     |
| MB-788    | TCT → TAT       | S33Y       | loss                | loss     |
| MB-812    | GGA → AGA       | G34R       | loss                | loss     |
| MB-828    | GGA → AGA       | G34R       | loss                | loss     |
| MB-873    | TCT → TTT       | S37F       | loss                | loss     |
| MB-883    | GAC → AAC       | D32N       | loss                | loss     |
| MB-891    | TCT → TTT       | S33F       | loss                | loss     |
| MB-905    | GAC → TAC       | D32Y       | loss                | loss     |

**Supplementary Table 9: *CTNNB1* mutation and chr6 loss in WNT medulloblastoma**

| Sample ID | Exon 3 Mutation |             | Chromosome 6 Status |          |
|-----------|-----------------|-------------|---------------------|----------|
|           | Codon           | Amino Acid  | p arm               | q arm    |
| MB-956    | GAC → TAC       | D32Y        | loss                | loss     |
| MB-972    | TCT → TTT       | S33F        | loss                | loss     |
| MB-1055   | TCT → TTT       | S33F        | balanced            | balanced |
| MB-1082   | GAC → TAC       | D32Y        | loss                | loss     |
| MB-1089   | TCT → TTT       | S33F        | balanced            | balanced |
| MB-1109   | GAC → GTC       | D32V        | loss                | loss     |
| MB-1130   | TCT → CCT       | S33P        | loss                | loss     |
| MB-1169   | TCT → TGT       | S37C        | loss                | loss     |
| MB-1171   | TCT → TTT       | S37F        | loss                | loss     |
| MB-1198   | TCT → TGT       | S33C        | loss                | loss     |
| MB-1235   | TCT → TTT       | S37F        | balanced            | balanced |
| MB-1237   | TCT → GCT       | S37A        | loss                | loss     |
| MB-1255   | TCT → TGT       | S33C        | loss                | loss     |
| MB-1259   | GAC → TAC       | D32Y        | balanced            | loss     |
| MB-1275   | GAC → AAC       | D32N        | balanced            | balanced |
| MB-1299   | TCT → TGT       | S33C        | loss                | loss     |
| MB-1321   | GAC → AAC       | D32N        | balanced            | balanced |
| MB-1331   | GAC → TAC       | D32Y        | loss                | loss     |
| MB-1335   | TCT → CCT       | S33P        | loss                | loss     |
| MB-1343   | TCT → TAT       | S33Y        | loss                | loss     |
| MB-1355   | TCT → TGT       | S33C        | loss                | loss     |
| MB-1368   | TCT → GCT       | S33A        | loss                | loss     |
| MB-1380   | GGA → AGA       | G34R        | loss                | loss     |
| MB-389    | no mutation     | no mutation | balanced            | balanced |
| MB-566    | no mutation     | no mutation | balanced            | balanced |
| MB-687    | no mutation     | no mutation | loss                | loss     |
| MB-811    | no mutation     | no mutation | loss                | loss     |
| MB-865    | no mutation     | no mutation | loss                | loss     |
| MB-1026   | no mutation     | no mutation | balanced            | balanced |
| MB-1029   | no mutation     | no mutation | loss                | loss     |
| MB-1220   | no mutation     | no mutation | balanced            | Balanced |

**Supplementary Table 10. SHH GISTIC Regions: Amplifications**

| <b>Cytoband</b> | <b>Peak Limits</b> | <b>Size (Kbp)</b> | <b>GISTIC q-value</b> | <b>CMDS</b> | <b># genes</b> | <b>Key candidate(s)</b>  |
|-----------------|--------------------|-------------------|-----------------------|-------------|----------------|--------------------------|
| 1p34.2          | 39.994-40.275      | 280.64            | 0.00012472            | Yes         | 6              | <i>MYCL1</i>             |
| 1p22.3          | 86.700-87.635      | 935.38            | 0.093888              | Yes         | 9              | <i>LMO4</i>              |
| 1q32.1          | 202.018-202.796    | 778.48            | 0.0073744             | Yes         | 14             | <i>MDM4, SOX13</i>       |
| 2p24.3          | 15.965-16.011      | 45.93             | 4.51E-28              | Yes         | 2              | <i>MYCN</i>              |
| 2q14.2          | 121.169-121.502    | 333.24            | 3.05E-13              | Yes         | 1              | <i>GLI2</i>              |
| 3p22.2          | 37.234-38.566      | 1,331.71          | 0.0083719             | Yes         | 18             | <i>MYD88, ACVR2B</i>     |
| 3q25.1          | 152.175-152.643    | 468.30            | 0.11644               | Yes         | 8              | <i>MED12L, P2RY14</i>    |
| 4q12            | 55.270-55.277      | 7.06              | 1.05E-06              | No          | 1              | <i>KIT</i>               |
| 5q32            | 146.422-146.446    | 23.97             | 0.12294               | No          | 1              | <i>PPP2R2B</i>           |
| 6p21.2          | 37.296-37.405      | 108.63            | 0.082636              | No          | 2              | <i>TBC1D22B, TMEM217</i> |
| 6q24.3          | 146.260-146.263    | 2.95              | 0.030014              | No          | 1              | <i>SHPRH</i>             |
| 7q21.2          | 91.870-92.443      | 573.20            | 0.0073744             | Yes         | 7              | <i>CDK6</i>              |
| 8q22.1          | 97.375-97.460      | 85.53             | 0.19704               | No          | 1              | <i>PTDSS1</i>            |
| 8q22.1          | 98.146-98.188      | 42.29             | 0.19704               | No          | 1              | <i>PGCP</i>              |
| 11q22.1         | 101.471-101.502    | 30.65             | 0.00032282            | Yes         | 1              | <i>YAP1</i>              |
| 12p13.33        | 0.000-4.096        | 4,095.66          | 0.14874               | Yes         | 35             | <i>FOXN1, KDM5A</i>      |
| 12p13.32        | 4.088-4.301        | 213.23            | 1.27E-06              | Yes         | 2              | <i>CCND2</i>             |
| 12p12.1         | 21.334-21.515      | 181.07            | 0.098396              | Yes         | 4              | <i>IAPP, RECQL</i>       |
| 12q15           | 67.385-67.414      | 29.61             | 0.24019               | No          | 1              | <i>NUP107</i>            |
| 13q33.3         | 107.696-109.344    | 1,648.49          | 0.020779              | No          | 3              | <i>IRS2</i>              |
| 15q26.3         | 96.895-97.902      | 1,006.96          | 0.030691              | Yes         | 6              | <i>IGF1R</i>             |
| 16p13.2         | 0.000-7.446        | 7,445.89          | 0.11705               | No          | 223            | <i>Unknown</i>           |
| 17p11.2         | 17.199-21.968      | 4,768.48          | 0.039471              | Yes         | 69             | <i>Unknown</i>           |
| 17q23.2         | 55.878-56.410      | 531.46            | 9.56E-06              | Yes         | 3              | <i>PPM1D</i>             |
| 21q22.11        | 34.398-34.400      | 2.108             | 0.021451              | No          | 2              | <i>MRPS6, SLC5A3</i>     |

**Supplementary Table 11. SHH GISTIC Regions: Deletions**

| <b>Cytoband</b> | <b>Peak Limits</b> | <b>Size (Kbp)</b> | <b>GISTIC q-value</b> | <b>CMDS</b> | <b># genes</b> | <b>Key candidate(s)</b> |
|-----------------|--------------------|-------------------|-----------------------|-------------|----------------|-------------------------|
| 1q21.3          | 150.754-150.948    | 194.15            | 0.17418               | No          | 11             | <i>CRCT1, LCE2B</i>     |
| 2p23.3          | 21.119-26.114      | 4994.32           | 0.11198               | No          | 28             | <i>DNMT3A, NCOA1</i>    |
| 4p16.3          | 0.000-9.394        | 9394.17           | 0.078486              | Yes         | 126            | <i>Unknown</i>          |
| 4q31.1          | 140.186-140.408    | 221.84            | 0.0025458             | No          | 3              | <i>CCRN4L, ELF2</i>     |
| 5q35.3          | 175.326-180.858    | 5531.52           | 0.0036882             | Yes         | 105            | <i>Unknown</i>          |
| 7p22.3          | 0.000-7.245        | 7245.34           | 0.093194              | No          | 82             | <i>Unknown</i>          |
| 7q11.23         | 71.515-76.590      | 5075.48           | 0.054351              | Yes         | 83             | <i>Unknown</i>          |
| 8p12            | 38.181-38.247      | 66.56             | 0.0096674             | No          | 3              | <i>BAG4, DDHD2</i>      |
| 9p23            | 7.790-12.683       | 4893.80           | 0.14285               | No          | 3              | <i>PTPRD, TYRP1</i>     |
| 9p21.3          | 21.229-22.439      | 1210.13           | 0.052058              | Yes         | 18             | <i>CDKN2A, CDKN2B</i>   |
| 9q22.32         | 97.118-97.680      | 561.45            | 1.31E-09              | Yes         | 5              | <i>PTCH1, FANCC</i>     |
| 9q31.3          | 107.576-110.819    | 3243.09           | 0.099337              | No          | 10             | <i>KLF4, IKBKAP</i>     |
| 10p14           | 8.157-11.424       | 3267.52           | 0.045888              | No          | 4              | <i>GATA3, CELF2</i>     |
| 10q23.31        | 89.568-90.024      | 456.30            | 1.24E-09              | Yes         | 5              | <i>PTEN</i>             |
| 15q15.1         | 39.361-40.280      | 919.44            | 0.0026476             | Yes         | 24             | <i>MAPKBP1, RTF1</i>    |
| 17p13.1         | 7.525-7.568        | 43.41             | 0.018874              | No          | 4              | <i>TP53</i>             |
| 17p11.2         | 19.180-21.224      | 2043.91           | 0.063384              | Yes         | 26             | <i>SPECC1, MAPK7</i>    |
| 20p13           | 0.000-5.941        | 5940.89           | 0.054351              | Yes         | 109            | <i>Unknown</i>          |

**Supplementary Table 12. Group 3 GISTIC Regions: Amplifications**

| <b>Cytoband</b> | <b>Peak Limits</b> | <b>Size (Kbp)</b> | <b>GISTIC q-value</b> | <b>CMDS</b> | <b># genes</b> | <b>Key candidate(s)</b> |
|-----------------|--------------------|-------------------|-----------------------|-------------|----------------|-------------------------|
| 1q21.2          | 148.687-148.862    | 175.23            | 0.095091              | Yes         | 7              | <i>ECM1, MCL1</i>       |
| 1q41            | 214.921-214.948    | 27.33             | 0.095091              | No          | 1              | <i>ESRRG</i>            |
| 2p24.3          | 15.909-16.095      | 186.32            | 2.30E-05              | No          | 2              | <i>MYCN</i>             |
| 2p24.1          | 20.031-20.047      | 16.05             | 0.19014               | No          | 1              | <i>WDR35</i>            |
| 2q22.3          | 148.172-148.605    | 433.81            | 8.68E-05              | No          | 3              | <i>ACVR2A</i>           |
| 3p22.2          | 38.357-38.754      | 396.97            | 0.024444              | Yes         | 6              | <i>ACVR2B</i>           |
| 6q24.3          | 146.256-146.266    | 10.30             | 0.086557              | No          | 1              | <i>SHPRH</i>            |
| 7q21.2          | 91.330-92.398      | 1067.90           | 0.0024037             | Yes         | 13             | <i>CDK6</i>             |
| 8q21.11         | 77.858-77.919      | 61.68             | 0.15945               | No          | 1              | <i>ZFHX4</i>            |
| 8q21.2          | 86.242-86.343      | 100.45            | 0.095091              | No          | 3              | <i>E2F5, LRRCC1</i>     |
| 8q24.12         | 121.690-121.719    | 29.01             | 0.016081              | No          | 1              | <i>SNTB1</i>            |
| 8q24.13         | 124.618-124.723    | 105.14            | 0.0052581             | Yes         | 1              | <i>FBXO32</i>           |
| 8q24.21         | 128.809-128.832    | 23.39             | 3.54E-33              | Yes         | 1              | <i>MYC</i>              |
| 8q24.21         | 129.005-129.315    | 310.33            | 0.00027813            | Yes         | 5              | <i>PVT1</i>             |
| 8q24.21         | 130.890-130.933    | 42.59             | 0.0030156             | Yes         | 1              | <i>FAM49B</i>           |
| 8q24.22         | 132.865-133.461    | 595.64            | 0.18746               | Yes         | 4              | <i>EFR3A, KCNQ3</i>     |
| 8q24.22         | 134.154-134.181    | 27.10             | 0.0035215             | Yes         | 2              | <i>TG, SLA</i>          |
| 8q24.23         | 139.291-139.331    | 40.45             | 0.095091              | No          | 1              | <i>FAM135B</i>          |
| 9q22.33         | 100.898-101.028    | 129.42            | 0.07282               | No          | 3              | <i>TGFBR1</i>           |
| 12p13.33        | 0.000-0.236        | 235.55            | 0.036881              | No          | 5              | <i>IQSEC3, SLC6A12</i>  |
| 14q23.1         | 56.285-56.374      | 88.82             | 0.0073102             | No          | 2              | <i>OTX2</i>             |
| 14q32.31        | 100.451-100.479    | 27.70             | 0.080686              | No          | 7              | <i>SNORD113-1</i>       |

**Supplementary Table 13. Group 3 GISTIC Regions: Deletions**

| Cytoband | Peak Limits     | Size (Kbp) | GISTIC q-value | CMDS | # genes | Key candidate(s)       |
|----------|-----------------|------------|----------------|------|---------|------------------------|
| 3q23     | 142.948-143.080 | 132.41     | 0.008657       | No   | 3       | <i>ATP1B3, GRK7</i>    |
| 4p16.1   | 0.000-9.394     | 9394.17    | 0.19331        | No   | 126     | <i>Unknown</i>         |
| 4q31.1   | 140.186-140.408 | 221.84     | 0.11826        | No   | 3       | <i>CCRN4L, ELF2</i>    |
| 4q31.3   | 151.713-152.240 | 527.37     | 0.060434       | No   | 3       | <i>MAB21L2, RPS3A</i>  |
| 5q13.2   | 67.632-70.703   | 3070.93    | 0.20612        | No   | 27      | <i>PIK3R1, CDK7</i>    |
| 5q35.3   | 178.440-180.858 | 2417.66    | 4.43E-10       | Yes  | 43      | <i>MAPK9, RASGEF1C</i> |
| 6q13     | 73.169-75.851   | 2682.01    | 0.13269        | No   | 16      | <i>SLC17A5, CD109</i>  |
| 8p12     | 38.181-38.247   | 66.56      | 0.1406         | No   | 3       | <i>PPAPDC1B, BAG4</i>  |
| 9q34.13  | 134.501-134.540 | 38.60      | 2.01E-08       | No   | 2       | <i>DDX31, GTF3C4</i>   |
| 10p14    | 8.157-11.424    | 3267.52    | 0.042514       | No   | 4       | <i>GATA3, CELF2</i>    |
| 11p15.4  | 4.748-4.885     | 137.510    | 0.0052643      | Yes  | 6       | <i>OR51A7</i>          |
| 11q22.3  | 102.847-104.320 | 1472.79    | 0.077979       | No   | 7       | <i>DYNC2H1, CASP4</i>  |
| 13q12.2  | 27.457-27.647   | 190.28     | 0.052909       | No   | 4       | <i>FLT3, PAN3</i>      |
| 14q13.1  | 33.484-34.528   | 1043.23    | 0.077979       | Yes  | 8       | <i>BAZ1A, SNX6</i>     |
| 16q23.3  | 80.689-81.221   | 531.62     | 0.0913         | Yes  | 3       | <i>MPHOSPH6, CDH13</i> |
| 16q23.3  | 82.551-88.827   | 6275.81    | 0.12178        | Yes  | 96      | <i>Unknown</i>         |
| 16q24.1  | 83.702-84.269   | 566.81     | 0.024343       | Yes  | 6       | <i>GINS2, FAM92B</i>   |
| 17p13.3  | 0.000-2.159     | 2159.30    | 0.20612        | No   | 42      | <i>HIC1</i>            |
| 17p12    | 10.681-12.513   | 1831.22    | 0.030517       | Yes  | 8       | <i>MAP2K4, DNAH9</i>   |
| 20p13    | 0.000-1.824     | 1824.39    | 0.017067       | Yes  | 37      | <i>SIRPA</i>           |

**Supplementary Table 14. Group 4 GISTIC Regions: Amplifications**

| Cytoband | Peak Limits     | Size (Kbp) | GISTIC q-value | CMDS | # genes | Key candidate(s)      |
|----------|-----------------|------------|----------------|------|---------|-----------------------|
| 1q41     | 214.939-214.948 | 9.47       | 0.066553       | No   | 1       | <i>ESRRG</i>          |
| 2p25.3   | 2.171-2.197     | 26.66      | 0.19858        | Yes  | 1       | <i>MYT1L</i>          |
| 2p24.3   | 15.254-15.275   | 20.73      | 0.00013144     | Yes  | 1       | <i>NBAS</i>           |
| 2p24.3   | 15.668-15.700   | 31.59      | 0.00014206     | Yes  | 1       | <i>DDX1</i>           |
| 2p24.3   | 15.980-16.013   | 33.43      | 4.14E-32       | Yes  | 2       | <i>MYCN</i>           |
| 2p24.3   | 16.599-16.620   | 21.24      | 0.10051        | Yes  | 1       | <i>FAM49A</i>         |
| 2p24.2   | 18.591-18.678   | 87.57      | 0.0058887      | Yes  | 3       | <i>NT5C1B</i>         |
| 2p24.1   | 20.041-20.061   | 19.94      | 0.022966       | No   | 2       | <i>MATN3, WDR35</i>   |
| 2p24.1   | 20.252-20.279   | 26.21      | 0.01601        | No   | 1       | <i>SDC1</i>           |
| 3p22.2   | 38.346-38.530   | 184.40     | 0.0014461      | Yes  | 4       | <i>ACVR2B</i>         |
| 3p22.1   | 41.249-41.254   | 5.20       | 0.026638       | No   | 1       | <i>CTNNB1</i>         |
| 5q14.3   | 87.867-87.890   | 22.68      | 0.23651        | No   | 1       | <i>LINC00461</i>      |
| 5q23.2   | 121.785-121.807 | 22.51      | 1.10E-14       | Yes  | 1       | <i>SNCAIP</i>         |
| 6q24.3   | 146.260-146.266 | 6.50       | 0.00018853     | No   | 1       | <i>SHPRH</i>          |
| 7p21.3   | 12.213-12.230   | 17.15      | 0.1597         | No   | 1       | <i>TMEM106B</i>       |
| 7p12.2   | 50.654-50.673   | 18.97      | 0.0066882      | No   | 1       | <i>GRB10</i>          |
| 7p11.1   | 56.564-57.594   | 1030.26    | 0.0075151      | No   | 7       | <i>ZNF479, ZNF716</i> |
| 7q21.11  | 84.586-84.602   | 16.74      | 0.00076778     | Yes  | 1       | <i>SEMA3D</i>         |
| 7q21.2   | 92.016-92.328   | 312.34     | 1.41E-22       | Yes  | 3       | <i>CDK6</i>           |
| 7q31.1   | 108.552-119.755 | 11202.10   | 0.060782       | No   | 33      | <i>MET</i>            |
| 7q33     | 134.739-134.756 | 16.76      | 0.089932       | No   | 1       | <i>CNOT4</i>          |
| 8p11.21  | 41.015-43.943   | 2928.29    | 0.030523       | No   | 26      | <i>HOOK3, ANK1</i>    |
| 8q11.22  | 51.847-52.074   | 226.77     | 0.02536        | No   | 1       | <i>SNTG1</i>          |
| 8q23.1   | 106.446-106.601 | 154.77     | 0.15106        | No   | 1       | <i>ZFPM2</i>          |
| 8q24.21  | 128.792-128.856 | 63.90      | 0.0024916      | No   | 1       | <i>MYC</i>            |
| 9p24.2   | 3.987-3.995     | 8.34       | 0.0059279      | No   | 1       | <i>GLIS3</i>          |
| 10p15.3  | 0.000-0.299     | 299.30     | 0.034517       | No   | 2       | <i>ZMYND11</i>        |
| 12p13.32 | 4.205-5.249     | 1044.92    | 2.54E-05       | Yes  | 13      | <i>CCND2, KCNA1</i>   |
| 12p12.3  | 16.732-19.784   | 3051.96    | 0.1247         | No   | 8       | <i>PIK3C2G, AEBP2</i> |
| 14q23.1  | 56.339-56.793   | 454.48     | 0.069953       | No   | 3       | <i>OTX2</i>           |
| 17q12    | 28.054-29.923   | 1868.88    | 0.053268       | No   | 12      | <i>CCL2, MYO1D</i>    |
| 17q21.31 | 38.505-38.512   | 6.95       | 0.15071        | No   | 1       | <i>BRCA1</i>          |
| 18q23    | 76.041-76.117   | 76.25      | 0.05313        | No   | 1       | <i>PARD6G</i>         |
| 19p13.3  | 0.636-0.816     | 180.20     | 0.00028473     | No   | 11      | <i>LPPR3, PALM</i>    |
| 21q22.11 | 34.398-34.400   | 2.17       | 0.00060755     | No   | 2       | <i>MRPS6, SLC5A3</i>  |

**Supplementary Table 15. Group 4 GISTIC Regions: Deletions**

| <b>Cytoband</b> | <b>Peak Limits</b> | <b>Size (Kbp)</b> | <b>GISTIC q-value</b> | <b>CMDS</b> | <b># genes</b> | <b>Key candidate(s)</b> |
|-----------------|--------------------|-------------------|-----------------------|-------------|----------------|-------------------------|
| 2q37.3          | 234.590-242.951    | 8360.89           | 0.00029198            | No          | 81             | <i>Unknown</i>          |
| 3p21.31         | 49.199-49.376      | 177.08            | 0.01734               | Yes         | 7              | <i>RHOA, USP4</i>       |
| 5q13.2          | 67.632-70.703      | 3070.93           | 0.095745              | No          | 27             | <i>PIK3R1, CCNB1</i>    |
| 5q35.3          | 175.243-180.858    | 5614.77           | 8.26E-14              | Yes         | 106            | <i>Unknown</i>          |
| 8p12            | 38.181-38.247      | 66.56             | 0.020097              | No          | 3              | <i>BAG4, DDHD2</i>      |
| 9p13.2          | 36.387-36.832      | 444.59            | 0.15499               | No          | 4              | <i>PAX5, MELK</i>       |
| 10p12.33        | 17.858-18.281      | 423.60            | 0.057012              | No          | 5              | <i>MRC1, SLC39A12</i>   |
| 10q11.21        | 42.647-42.957      | 310.83            | 0.0018621             | No          | 3              | <i>RET</i>              |
| 12p11.21        | 31.633-31.720      | 86.67             | 0.23467               | No          | 3              | <i>DENND5B</i>          |
| 13q14.2         | 47.732-47.895      | 162.78            | 0.00024593            | No          | 3              | <i>RB1</i>              |
| 14q13.2         | 33.484-35.075      | 1590.61           | 0.039558              | Yes         | 14             | <i>BAZ1A, NFKBIA</i>    |
| 17p13.3         | 1.624-1.684        | 60.78             | 0.014875              | No          | 3              | <i>SMYD4, RPA1</i>      |
| 22q12.2         | 28.563-28.807      | 243.95            | 0.25114               | No          | 3              | <i>MTMR3</i>            |
| 22q13.31        | 41.580-49.691      | 8111.72           | 8.45E-05              | Yes         | 103            | <i>Unknown</i>          |

**Supplementary Table 17. Summary of RNASeq data**

| Sample                             | Subgroup | Total Sequenced Reads (millions) | Gb (Total) | Chastity Passed (%) | Aligned (%)* | Uniquely Aligned (%)* |
|------------------------------------|----------|----------------------------------|------------|---------------------|--------------|-----------------------|
| <b>MB-182</b>                      | Group 3  | 171.37                           | 17.14      | 94.87               | 82.72        | 77.60                 |
| <b>MB-412</b>                      | Group 3  | 143.15                           | 14.31      | 94.78               | 79.77        | 73.90                 |
| <b>MB-549</b>                      | Group 3  | 161.70                           | 16.17      | 94.90               | 82.59        | 77.21                 |
| <b>MB-591</b>                      | Group 3  | 143.07                           | 14.31      | 95.45               | 83.19        | 79.59                 |
| <b>MB-759</b>                      | Group 3  | 168.60                           | 16.86      | 94.20               | 78.87        | 75.29                 |
| <b>MB-522</b>                      | Group 3  | 117.44                           | 11.74      | 86.36               | 71.28        | 63.46                 |
| <b>MB-586</b>                      | Group 3  | 209.59                           | 20.96      | 83.66               | 81.22        | 75.56                 |
| <b>MB-329</b>                      | Group 3  | 200.46                           | 20.05      | 94.00               | 82.14        | 78.65                 |
| <b>MB-333</b>                      | Group 3  | 158.10                           | 15.81      | 94.76               | 81.67        | 78.29                 |
| <b>MB-511</b>                      | Group 3  | 214.46                           | 21.45      | 93.23               | 80.50        | 77.21                 |
| <b>MB-532</b>                      | Group 3  | 216.24                           | 21.62      | 93.08               | 78.62        | 73.81                 |
| <b>MB-594</b>                      | Group 3  | 146.55                           | 14.65      | 95.31               | 81.91        | 76.78                 |
| <b>MB-607</b>                      | Group 3  | 186.69                           | 18.67      | 94.27               | 82.27        | 79.00                 |
| <b>MB-439</b>                      | Group 4  | 137.00                           | 13.70      | 95.44               | 84.82        | 81.45                 |
| <b>MB-447</b>                      | Group 4  | 184.16                           | 18.42      | 94.03               | 83.65        | 79.92                 |
| <b>MB-563</b>                      | Group 4  | 219.11                           | 21.91      | 91.70               | 77.49        | 73.58                 |
| <b>MB-569</b>                      | Group 4  | 188.17                           | 18.82      | 93.20               | 78.83        | 74.19                 |
| <b>MB-600</b>                      | Group 4  | 117.02                           | 11.70      | 96.44               | 86.09        | 82.52                 |
| * percent of Chastity-passed reads |          |                                  |            |                     |              |                       |

**Supplementary Table 18. PVT1 fusions identified by RNASeq**

| Sample  | Subgroup | Read Pairs | Spanning Reads | Type        | Transcript Breakpoint           | Genes             |
|---------|----------|------------|----------------|-------------|---------------------------------|-------------------|
| MB-182  | Group 3  | 17         | 525            | duplication | chr8:128819674   chr8:128972426 | <i>MYC/PVT1</i>   |
| MB-586  | Group 3  | 106        | 121            | inversion   | chr8:128898314   chr8:134332102 | <i>PVT1/NDRG1</i> |
| MB-182  | Group 3  | 7          | 158            | inversion   | chr8:128598808   chr8:128972426 | <i>NA/PVT1</i>    |
| MB-0527 | Group 4  | 4          | 67             | duplication | chr12:3888813   chr12:6955557   | <i>NA/NA</i>      |
| MB-0532 | Group 3  | 6          | 74             | deletion    | chr3:117646494   chr3:119198718 | <i>LSAMP/NA</i>   |
| MB-0437 | Group 4  | 6          | 93             | deletion    | chr3:117646494   chr3:119198718 | <i>LSAMP/NA</i>   |

**Supplementary Table 19: PVT1-MYC fusion transcripts identified by RT-PCR/sequencing**

| Sample ID | Chromosome | Start     | Stop      |
|-----------|------------|-----------|-----------|
| D458      | Chr8       | 128876115 | 128876162 |
|           | Chr8       | 128877322 | 128877499 |
|           | Chr8       | 128972017 | 128972426 |
|           | Chr8       | 128819674 | 128819720 |
| MB-524    | Chr8       | 128876115 | 128876162 |
|           | Chr8       | 128972017 | 128972426 |
|           | Chr8       | 128819677 | 128819720 |
| MB-1003   | Chr8       | 128876115 | 128876163 |
|           | Chr8       | 128672133 | 128672284 |
|           | Chr8       | 128819679 | 128819720 |
| MB-1377   | Chr8       | 128876115 | 128876162 |
|           | Chr8       | 128972017 | 128972426 |
|           | Chr8       | 129070590 | 129070719 |
|           | Chr8       | 129091018 | 129091146 |
|           | Chr8       | 129273260 | 129273360 |
|           | Chr8       | 129274916 | 129275110 |
|           | Chr8       | 128819674 | 128819720 |
| MB-1240   | Chr8       | 128876115 | 128876162 |
|           | Chr8       | 128480320 | 128480445 |
|           | Chr8       | 128496315 | 128496449 |
|           | Chr8       | 128538807 | 128538950 |
|           | Chr8       | 128672133 | 128672284 |
|           | Chr8       | 128819679 | 128819720 |
| MB-182    | Chr8       | 128972185 | 128972426 |
|           | Chr8       | 128819677 | 128820004 |
| D425      | Chr8       | 128876128 | 128876162 |
|           | Chr8       | 128797600 | 128797375 |
|           | Chr8       | 128770850 | 128770742 |
|           | Chr8       | 128819676 | 128819720 |
| MB-1338   | Chr8       | 128876115 | 128876162 |
|           | Chr8       | 128420708 | 128420862 |
|           | Chr8       | 128480320 | 128480445 |
|           | Chr8       | 128496315 | 128496449 |
|           | Chr8       | 128672133 | 128672284 |
|           | Chr8       | 128819679 | 128819720 |

**Supplementary Table 19: PVT1-MYC fusion transcripts identified by RT-PCR/sequencing**

| Sample ID | Chromosome | Start     | Stop      |
|-----------|------------|-----------|-----------|
| MED8A     | Chr8       | 128876115 | 128876162 |
|           | Chr8       | 127959101 | 127959217 |
|           | Chr8       | 128087982 | 128088046 |
|           | Chr8       | 127437224 | 127436950 |
|           | Chr8       | 127435173 | 127435121 |
|           | Chr8       | 127390550 | 127390441 |
|           | Chr8       | 128819678 | 128819720 |
| MB-586    | Chr8       | 128876090 | 128876162 |
|           | Chr8       | 134332039 | 134331865 |
|           | Chr8       | 134330196 | 134330140 |
|           | Chr8       | 134329351 | 134329298 |
| MB-591    | Chr8       | 128876115 | 128876162 |
|           | Chr8       | 136770849 | 136771024 |
|           | Chr8       | 128819675 | 128819720 |
| MB-548    | Chr8       | 128876115 | 128876162 |
|           | Chr8       | 127959101 | 127959217 |
|           | Chr8       | 128087982 | 128088045 |
|           | Chr8       | 128819675 | 128819720 |
| MB-506    | Chr8       | 128876115 | 128876162 |
|           | Chr8       | 128972017 | 128972427 |
|           | Chr8       | 128770852 | 128770742 |
|           | Chr8       | 128819676 | 128819720 |

---

**Supplementary Table 20. Summary of WGS Data**

---

| Sample | Tissue Source | Total Sequenced Reads (million) | Gb (Total) | Chastity Passed (%) | Aligned (%)* | Uniquely Aligned (%)* | Estimated Coverage |
|--------|---------------|---------------------------------|------------|---------------------|--------------|-----------------------|--------------------|
| MB-586 | Normal        | 1431.97                         | 143.20     | 0.96                | 0.97         | 0.95                  | 28.6               |
| MB-586 | Tumour        | 877.44                          | 87.74      | 0.97                | 0.98         | 0.95                  | 23.7               |
| MB-182 | Tumour        | 720.27                          | 72.03      | 0.96                | 0.96         | 0.93                  | 21.3               |
| MB-506 | Tumour        | 1225.80                         | 122.58     | 0.90                | 0.97         | 0.94                  | 29.76              |
| MB-591 | Tumour        | 1123.53                         | 112.35     | 0.92                | 0.98         | 0.96                  | 26.32              |

\* percent of Chastity-passed reads

---

**Supplementary Table 21. Summary of genomic rearrangements identified by WGS**

| Tumor ID | Read Pairs | Spanning Reads | Rearrangement Type | Breakpoint                      |
|----------|------------|----------------|--------------------|---------------------------------|
| MB-586   | 522        | 916            | duplication        | chr8:128358681   chr8:131003895 |
|          | 230        | 300            | inversion          | chr8:128898613   chr8:134334795 |
|          | 226        | 284            | duplication        | chr8:138151282   chr8:144720390 |
|          | 72         | 107            | deletion           | chr8:134190644   chr8:144695698 |
|          | 134        | 101            | inversion          | chr8:130010482   chr8:144575540 |
|          | 141        | 82             | duplication        | chr8:133975475   chr8:138476809 |
|          | 44         | 18             | deletion           | chr8:130933695   chr8:138413808 |
|          | *          | *              | inversion          | chr8:130933766   chr8:138409988 |
|          | 8          | 50             | translocation      | chr11:38769234   chr8:52894035  |
|          | 4          | 28             | translocation      | chr11:38769245   chr8:52892696  |
| MB-182   | *          | *              | inversion          | chr8:128376622 chr8:128490341   |
|          | *          | *              | inversion          | chr8:128511892 chr8:128724152   |
|          | *          | *              | inversion          | chr8:127665816 chr8:128730482   |
|          | *          | *              | inversion          | chr8:128511892 chr8:128724152   |
|          | *          | *              | inversion          | chr8:127749539 chr8:128496176   |
|          | *          | *              | deletion           | chr8:128358025 chr8:128681850   |
|          | *          | *              | duplication        | chr8:127721581 chr8:128509496   |
|          | *          | *              | inversion          | chr8:128340130 chr8:128739091   |
|          | *          | *              | inversion          | chr8:127667933 chr8:128495165   |
|          | *          | *              | duplication        | chr8:128699377 chr8:128703999   |
| MB-506   | 647        | 189            | inversion          | chr8:128529954 chr8:128920150   |
|          | 156        | 119            | inversion          | chr8:128483915 chr8:128503517   |
|          | 1261       | 4545           | inversion          | chr8:124550752 chr8:128732360   |
|          | 800        | 1780           | inversion          | chr8:121393886 chr8:139855703   |
|          | 978        | 1479           | inversion          | chr8:121788137 chr8:135083440   |
|          | 1689       | 1296           | deletion           | chr8:121600073 chr8:131692073   |
|          | 1402       | 1167           | inversion          | chr8:135633998 chr8:143227809   |
|          | 895        | 1110           | duplication        | chr8:122179234 chr8:134837168   |
|          | 614        | 1114           | duplication        | chr8:124037949 chr8:139855860   |
|          | 716        | 889            | duplication        | chr8:142179088 chr8:143486891   |
|          | 246        | 825            | deletion           | chr8:134095104 chr8:136240715   |
|          | 755        | 717            | inversion          | chr8:129966255 chr8:143089147   |
|          | 734        | 342            | deletion           | chr8:129595164 chr8:134567530   |
|          | 685        | 247            | inversion          | chr8:125207698 chr8:140187756   |
|          | 982        | 233            | inversion          | chr8:136440723 chr8:143016798   |
|          | 400        | 244            | deletion           | chr8:125138504 chr8:127431174   |
|          | 999        | 192            | inversion          | chr8:136440934 chr8:143016798   |
|          | 1871       | 122            | deletion           | chr8:124080899 chr8:141423353   |
|          | 389        | 166            | duplication        | chr8:134094959 chr8:142857977   |
|          | 729        | 114            | deletion           | chr8:128239838 chr8:142857248   |
|          | 1379       | 24             | inversion          | chr8:135633999 chr8:143227812   |
|          | 224        | 34             | inversion          | chr8:130378666 chr8:134510306   |
|          | 18         | 27             | inversion          | chr8:115084238 chr8:116047840   |
|          | 31         | 24             | inversion          | chr8:121443194 chr8:136331286   |
|          | 15         | 17             | duplication        | chr8:129800778 chr8:143021850   |
|          | 29         | 16             | deletion           | chr8:129789133 chr8:133020748   |

**Supplementary Table 21. Summary of genomic rearrangements identified by WGS**

| Tumor ID | Read Pairs | Spanning Reads | Rearrangement Type | Breakpoint                    |
|----------|------------|----------------|--------------------|-------------------------------|
| MB-591   | 64         | 1259           | duplication        | chr8:136150104 chr8:136676402 |
|          | 73         | 626            | deletion           | chr8:85820837 chr8:134456611  |
|          | 265        | 211            | inversion          | chr8:128840459 chr8:136683965 |
|          | 93         | 199            | duplication        | chr8:86058578 chr8:93489364   |
|          | 181        | 189            | deletion           | chr8:108117419 chr8:131531652 |
|          | 187        | 177            | inversion          | chr8:92987896 chr8:99358152   |
|          | 36         | 129            | inversion          | chr8:92164234 chr8:144528605  |
|          | 141        | 123            | duplication        | chr8:124800334 chr8:125631338 |
|          | 5          | 127            | deletion           | chr8:128840459 chr8:136683970 |
|          | 167        | 118            | inversion          | chr8:104131902 chr8:140105117 |
|          | 141        | 113            | duplication        | chr8:128495369 chr8:137052439 |
|          | 300        | 106            | duplication        | chr8:121461272 chr8:136985098 |
|          | 60         | 100            | inversion          | chr8:86151543 chr8:144603161  |
|          | 132        | 93             | duplication        | chr8:92588680 chr8:110612811  |
|          | 78         | 74             | inversion          | chr8:91933728 chr8:144594818  |
|          | 90         | 59             | inversion          | chr8:98152159 chr8:146077903  |
|          | 71         | 55             | duplication        | chr8:128411232 chr8:137092060 |
|          | 44         | 55             | duplication        | chr8:119968554 chr8:125269158 |
|          | 63         | 50             | inversion          | chr8:103167217 chr8:108419056 |
|          | 51         | 43             | deletion           | chr8:125496202 chr8:128154508 |
|          | 277        | 31             | duplication        | chr8:91585131 chr8:92589079   |
|          | 21         | 41             | deletion           | chr8:96391716 chr8:102656636  |
|          | 27         | 40             | inversion          | chr8:92738707 chr8:103228839  |
|          | 37         | 36             | inversion          | chr8:130545868 chr8:144503944 |
|          | 65         | 33             | duplication        | chr8:127594366 chr8:128155000 |
|          | 24         | 34             | duplication        | chr8:102468947 chr8:117016078 |
|          | 72         | 32             | duplication        | chr8:108403007 chr8:142698277 |
|          | 74         | 26             | deletion           | chr8:96408243 chr8:136575345  |
|          | 24         | 24             | deletion           | chr8:87109716 chr8:123090840  |
|          | 12         | 23             | duplication        | chr8:86993707 chr8:123091034  |
|          | 13         | 15             | deletion           | chr8:134311536 chr8:142529042 |
|          | 28         | 8              | inversion          | chr8:117012059 chr8:121316990 |

\* found manually by visual inspection

## Supplementary Methods

### Sections

|                                                                           |    |
|---------------------------------------------------------------------------|----|
| Patient samples and nucleic acid extraction.....                          | 70 |
| SNP6 copy number analysis.....                                            | 70 |
| SNP array processing and quality control.....                             | 70 |
| Generation and normalization of copy number profiles.....                 | 71 |
| Identification of recurrent copy number aberrations.....                  | 71 |
| Estimation of the copy number states of genes .....                       | 72 |
| Identification of recurrent broad events .....                            | 72 |
| Identification of chromothripsis .....                                    | 73 |
| Subgroup enrichment analysis of recurrent copy number aberrations.....    | 73 |
| Integration of gene expression and copy number aberrations.....           | 73 |
| Identification of candidate driver genes in each significant region ..... | 73 |
| Mutual exclusivity analysis .....                                         | 74 |
| Network analysis.....                                                     | 74 |
| Unsupervised clustering analysis of copy number events.....               | 75 |
| Expression array processing and data analysis.....                        | 75 |
| nanoString CodeSets and data analysis.....                                | 75 |
| RNASeq library generation and data analysis.....                          | 75 |
| Identification of gene fusions .....                                      | 76 |
| Whole genome sequencing (WGS).....                                        | 76 |
| Simulation of Progressive Genomic Rearrangements.....                     | 76 |
| Circos plot and double-minute chromosome structure .....                  | 77 |
| Identification of actionable targets.....                                 | 77 |
| PVT1-MYC fusion detection .....                                           | 78 |
| TaqMan qPCR of miR-1204, 1205, 1207 .....                                 | 78 |
| <i>CTNNB1</i> mutation analysis.....                                      | 79 |
| Cell lines, cell culture and transfections .....                          | 79 |
| MTS Cell Proliferation Assay .....                                        | 79 |
| Statistical and bioinformatic analyses.....                               | 79 |
| References.....                                                           | 80 |

## **Patient samples and nucleic acid extraction**

All patient samples were procured in accordance with the Research Ethics Board at The Hospital for Sick Children (Toronto, Canada). Samples were obtained as frozen tissue biopsies at the time of diagnosis and stored at -80°C until processed for purification of nucleic acids. Frozen tissue was available for ~75-80% of cases included in the study; the remaining cases were shipped as pre-isolated DNA and/or RNA.

Whenever possible, tumour isolates were partitioned for both standard DNA and RNA extraction. Tissues were either manually homogenized using a mortar and pestle in the presence of liquid nitrogen or in an automated manner using a Precellys 24 tissue homogenizer (Bertin Technologies, France), according to the manufacturer's instructions. High molecular weight DNA was extracted by SDS/Proteinase K digestion followed by 2-3 phenol extractions and ethanol precipitation. Total RNA was isolated using the Trizol method (Invitrogen, USA) using standard protocols. DNA and RNA were quantified using a NanoDrop 1000 instrument (Thermo Scientific, USA) and integrity assessed either by agarose gel electrophoresis (DNA) or Agilent 2100 Bioanalyzer (RNA; Agilent, USA) at The Centre for Applied Genomics (TCAG, Toronto, Canada). RNA with an RNA Integrity Number (RIN) of  $\geq 7.0$  was required for analysis by either Affymetrix Gene array or RNASeq.

## **SNP6 copy number analysis**

### **SNP array processing and quality control**

For genotyping of DNA samples we used the Affymetrix Genome-Wide Human SNP Array 6.0, which includes more than 906,600 single nucleotide polymorphisms (SNPs) and more than 946,000 probes for the detection of copy number variation. All 1.8 million probes can be used to detect CNVs making the median inter-marker distance less than 700 bases across the genome.

DNA was independently prepared, labeled, and hybridized to the Affymetrix SNP 6.0 arrays according to standard protocols as provided by the manufacturer and described elsewhere<sup>1-3</sup>. Briefly, 500ng of total genomic DNA was digested with NspI and StyI restriction enzymes (New England Biolabs, Boston, MA) to prepare a reduced representation of the genome that was ligated to universal adaptors and amplified by PCR. PCR conditions were optimized to preferentially amplify fragments ranging from 200-1,100bp. PCR amplification products for each restriction enzyme digest were combined and purified using polystyrene beads. The amplified DNA was then fragmented with DNaseI, biotin-labeled, and hybridized to the array. After hybridization, arrays were washed on Affymetrix fluidics stations and scanned using the Gene Chip Scanner 3000 7G.

For initial quality control, array files were loaded into Affymetrix Genotyping Console (GTC). Those meeting Affymetrix's recommended quality control guideline of contrast QC>0.4 were used for further analyses. Following copy number analysis in GTC, we used the MAPD score (i.e. Median of the Absolute values of all Pairwise Differences between log<sub>2</sub> ratios for a given chip) to identify possible outlier arrays, using the Affymetrix recommended threshold of MAPD=0.35 as an upper limit for acceptable hybridizations.

To check for duplicate samples and cryptic relatedness between cases, pair-wise identity by descent (IBD) was calculated for every pair of cases from the genotypes of 934,968 SNP probes on the SNP6 platform, using the PLINK toolset<sup>4</sup>. Those pairs of samples with PI\_HAT values (defined as  $P(\text{IBD}=2)+0.5 \cdot P(\text{IBD}=1)$ ) greater than 0.2 were further investigated for relatedness and only one sample from each pair was used in the final dataset.

### Generation and normalization of copy number profiles

Affymetrix SNP6 CEL files were processed in dChip<sup>5</sup> to obtain raw copy number estimates. Arrays were normalized by quantile normalization and signal intensities computed using the MBEI method (PM-only) inherent to the dChip program. To generate a diploid reference baseline for copy number analysis of medulloblastoma samples, we used Affymetrix SNP6 data from 132 individuals from the Ontario Population Genomics Platform (OPGP) epidemiological project and the HapMap PROJECT. Germline DNA from these samples was genotyped in the same microarray facility as the tumour samples, using identical experimental protocols as described above.

The normalized copy number estimates from dChip were subsequently imported into the R environment, and the copy number profiles were segmented using the Circular Binary Segmentation (CBS) algorithm from the DNACopy (v1.24)<sup>6</sup> package, with the undo split option enabled (method = sdundo, undo.SD = 1). The resulting segmentation profiles were further processed to reduce artificial segments. Segments with fewer than 10 markers were removed. Adjacent segments whose copy number states differed by less than 0.25 were merged together using their size-weighted mean. This merging step is repeated iteratively until no more segments can be merged. The segmentation profile of each sample was then median-centered. Further, normal CNVs reported in the Database of Genomic Variants (DGV, v10)<sup>7</sup> were filtered from the segmentation profiles. Segments that reciprocally overlapped (Dice coefficient > 0.5) with normal CNVs were removed. CNVs reported on BAC End Sequencing, BAC Array CGH, ROMA, and FISH were excluded from this filter. Upon removing a segment, the upstream segment was merged to the downstream segment using a size-weighted mean. The aforementioned merging and CNV-filtering steps helped reduce the occurrence of broad segments being broken into non-contiguous pieces by artificial segments or normal CNVs (which influences the downstream GISTIC2 analysis and segment classification).

The copy number segments were classified as balanced or one of 6 copy number aberrations (CNAs) based on the following criteria:

| Class                    | Log R ratio ( $r$ )  | Size ( $s$ ) |
|--------------------------|----------------------|--------------|
| Balanced                 | $ r  \leq 0.2$       | ---          |
| Gain                     | $r > 0.2$            | ---          |
| Loss                     | $r < -0.2$           | ---          |
| Focal gain               | $r > 0.2$            | $s < 12$ Mbp |
| Focal loss               | $r < -0.2$           | $s < 12$ Mbp |
| High level amplification | $r > \log_2(5/2)$    | $s < 12$ Mbp |
| Homozygous deletion      | $r < -\log_2(0.7/2)$ | $s < 12$ Mbp |

### Identification of recurrent copy number aberrations

The post-processed segmentation files profiles were analyzed using two algorithms, GISTIC2 and modified CMDS, to identify recurrent copy number events. GISTIC2 requires prior single sample segmentation, and hence may be affected by the presence of segmentation artifacts. In contrast, CMDS requires no single sample segmentation and works with the raw copy number profiles

directly. Many post-processing steps were lacking from the distributed CMDS program (e.g. multiple hypothesis correction, peak calling, CNV filtering); therefore, a number of post-processing steps were added.

GISTIC2 (v2.0.12)<sup>8</sup> was run with default parameters unless specified otherwise (brlen = 0.5, conf = 0.9), on the segmentation profiles of the entire cohort and of each subgroup separately. The significant peaks were filtered based on the gene content ( $\geq 1$  gene spanned), size of the wide peak ( $< 12$  Mbp), and additionally based on containment within a normal CNV region (one-way overlap  $> 90\%$ ) reported in the filtered DGV database. This second CNV-filtering step ensures that amalgamated regions reported in DGV are considered, as these regions would often have poor reciprocal overlap with individual query segments and would be missed by the previous CNV-filtering procedure. It is not possible to apply this secondary CNV-filtering procedure directly on the segmentation file, as the CNV regions are often very large and this filtering can cause the loss of many informative CNA segments.

CMDS (v 1.0)<sup>9</sup> was run using default parameters unless specified otherwise ( $w = 40$ ,  $s = 1$ ), on the unstratified and subgroup-stratified segmentation profiles, for each chromosome separately. Since the raw outputs had a high false positive rate, the outputs were processed further. The z-scores were recalculated (separately for each chromosome) from the Fisher's z-transformed of the Pearson correlations, using the means of the dominant components from Gaussian mixture models ( $k = 3$ ). This recalculation ensured that the z-scores were not skewed due to the presence of multiple modes in the raw output. The z-scores were further detrended using Empirical Mode Decomposition (EMD)<sup>10</sup>, which corrects for trends due to recurring broad events. The p-values derived from the z-scores were then corrected for multiple hypothesis correction using the qvalue R package(v1.1)<sup>11</sup>. Finally, the peak regions were identified using a simple q-value threshold (FDR = 0.05).

### **Estimation of the copy number states of genes**

The copy number states of all RefSeq genes in each sample were inferred from the respective post-processed segmentation profiles. The state for a given gene was determined by the copy number segment (classified as described earlier) that spans the greatest proportion of the gene (if multiple segments span the gene). Further, a gene is considered lost/deleted only if any portion of its coding region is spanned by a loss/deletion segment; a gene is considered gained/amplified only if at least 50% of the coding region is spanned by a gained/amplified segment.

### **Identification of recurrent broad events**

Identification of recurrent CNAs above explicitly excluded broad events (based on a broad length cutoff in GISTIC and by a detrending procedure after CMDS). Therefore, broad events in the segmentation profiles were analyzed separately, using an approach similar to GISTIC's broad event analysis.<sup>8</sup>

The  $\log_2$  R ratio (LRR) of each chromosome was calculated using a size-weighted mean of all segments mapping to the chromosome. A chromosome was declared gained if its LRR was greater than 0.2, lost if the LRR was less than -0.2, and balanced otherwise. Unlike GISTIC, gained and lost broad events were analyzed together. The significance of the frequency of each broad event was tested using the exact binomial test. Each broad event frequency was compared to the background frequency, which was determined from a robust regression of the observed

frequencies with respect to gene content (i.e. number of RefSeq genes) across all chromosomes. (This approach was motivated by GISTIC's broad event analysis.)

### **Identification of chromothripsis**

The occurrence of chromothripsis was identified using tumour copy number profiles as previously described.<sup>12</sup> Using the post-processed segmentation profiles, chromothripsis was identified on a chromosome based on the presence of greater than 10 copy number state changes. The enrichment of chromothripsis on a chromosome for a subgroup was determined using the hypergeometric test, comparing the observed incidence to the background incidence (tallied across all samples). Select samples inferred to have chromothripsis were confirmed by WGS to identify rearrangements.

### **Subgroup enrichment analysis of recurrent copy number aberrations**

Recurrent copy number aberrations (CNAs) identified by GISTIC2 in the unstratified and subgroup-stratified analysis were tested for subgroup enrichment. In the case of stratified analysis, regions identified in each subgroup were combined together. Since the reported region coordinates of common CNA events can differ among the strata, regions that reciprocally overlap (Dice coefficient > 0.2) were merged together using their union. In the enrichment analysis, the frequency of recurrent CNAs in each subgroup was compared against the remaining subgroups, and odds ratios were estimated using Fisher's conditional maximum likelihood estimate. CNAs with odds ratios greater than 2.0 were considered subgroup-enriched. A similar enrichment analysis was repeated for comparing combinations of two subgroups against the remaining, in order to identify CNAs that are enriched in the ensemble of two subgroups (and are not otherwise enriched in a single subgroup).

### **Integration of gene expression and copy number aberrations**

To directly assess the correlation between significant CNA and gene expression, expression profiles were generated on 285 medulloblastomas from our study, including samples from SHH (n=51), Group 3 (n=46), and Group 4 (n=188), using the Affymetrix Gene 1.1 ST platform. Global integration of expression data was performed by comparing expression levels of amplified or deleted genes relative to genes in balanced regions (Mann-Whitney tests). Further, specific integration of expression data at each significant CNA locus were done by comparing expression of genes in samples with the aberration against those that do not, within in medulloblastoma subgroup. Multiple hypothesis correction by the false discovery rate method was applied to each locus independently, and the false discovery rate threshold was adaptively tuned for each locus so that the no false positives are expected. The resulting lists of genes with copy-number driven expression were used in candidate identification.

### **Identification of candidate driver genes in each significant region**

Many of the significant regions identified using GISTIC and CMDS span multiple genes. Therefore, multiple lines of evidence were used to prioritize putative target genes within each region. Evidences collected from integrated expression data, the literature, and multiple datasets were classified into the following tiers:

| Type                              | Description                                                                                                               | Tier |
|-----------------------------------|---------------------------------------------------------------------------------------------------------------------------|------|
| <b>Correlated expression</b>      | Gene expression is driven by SCNA in the integrated analysis                                                              | I    |
| <b>Medulloblastoma literature</b> | Implicated in medulloblastoma from the literature (PubMed)                                                                | I    |
| <b>Cancer Gene Census</b>         | Documented in the Cancer Gene Census                                                                                      | II   |
| <b>Parsons</b>                    | Reported to be somatically mutated in the Parsons <i>et al.</i> <sup>13</sup> study on SNVs identified in medulloblastoma | III  |
| <b>ICGC</b>                       | Reported to be somatically mutated in the ICGC medulloblastoma WGS study (Nature, in review)                              | III  |
| <b>Northcott signature gene</b>   | Reported in the Northcott <i>et al.</i> <sup>14</sup> medulloblastoma expression subgroup study                           | IV   |
| <b>Cho signature gene</b>         | Reported in the Cho <i>et al.</i> <sup>15</sup> medulloblastoma expression subgroup study                                 | IV   |
| <b>RNASeq SNV</b>                 | Identified in the pilot RNASeq screen for SNV (Group 3 and 4 only)                                                        | IV   |
| <b>Gli1 target</b>                | Identified as a Gli1 target in Lee <i>et al.</i> <sup>16</sup> (SHH subgroup only)                                        | IV   |
| <b>Shh-inducible target</b>       | Identified as Shh-inducible gene by a screen in cerebellar granule neuron precursors (SHH subgroup only)                  | IV   |
| <b>COSMIC</b>                     | Documented in the Catalogue of Somatic Mutations in Cancer                                                                | V    |

The priority of each gene in a region was ranked based on the total score of the above lines of evidence, weighted by their respective tiers. A higher tier (lower number) is assigned a higher weight. The weights were assigned so that supporting evidence from the next tier is only considered for breaking ties at previous tiers. At most two genes from each region were selected for network analysis using this evidence-driven ranking.

### Mutual exclusivity analysis

The significant gene lists were analyzed to detect mutual exclusive relationships by iterating through all possible combination of genes in the list (for combination sizes from 2 to 6). Within each subgroup, combinations of genes with the highest exclusivity scores were identified. The exclusivity score was defined as the number of samples that harbour exactly one aberration among the genes in the combination; in other words, it is the product of exclusivity and coverage as defined by Miller *et al.*<sup>17</sup>

$$coverage = \frac{\text{number of samples with any aberration of genes in the combination}}{\text{total number of samples}}$$

$$exclusivity = \frac{\text{number of samples with exactly 1 aberration of genes in the combination}}{\text{number of samples with any aberration of genes in the combination}}$$

$$coverage = coverage \times exclusivity$$

### Network analysis

Pathway enrichment analysis of copy number aberrations was carried out using g:Profiler web server<sup>18</sup> and visualized in Cyotscape software as an Enrichment Map network<sup>19</sup>. Candidate driver genes from selected GISTIC2 regions were compiled for SHH, Group 3, and Group 4, ranked by frequency, and subsequently queried for significantly enriched functional categories with g:Profiler using the ordered list algorithm (FDR-corrected cutoff p=0.05, hypergeometric test).

Detected categories were filtered with a custom R script to only include Gene Ontology (GO) terms, and Reactome and KEGG pathways, using an upper limit of 500 genes per gene set and the requirement that at least two putative driver genes intersect with the gene set. A small number of non-informative KEGG pathways were removed from the final list. The overlap coefficient value 0.6 was used in Enrichment map visualization. Enrichment maps were manually adjusted to highlight the most significant themes for visualization purposes.

### **Unsupervised clustering analysis of copy number events**

All significant broad events (spanning chromosome arms) and focal events (identified as described earlier) identified in the pan-cohort analysis were used in the unsupervised clustering of medulloblastoma samples, by the Ward linkage method and the Euclidean distance metric, as implemented in the R environment. The copy number states were converted to absolute values and samples with unknown subgroup affiliation were removed prior to clustering. The agreement between the observed clusters and the medulloblastoma subgroups were assessed by the Adjusted Rand Index and tested by the  $\chi^2$  test.

### **Expression array processing and data analysis**

For gene expression array profiling, 400ng total RNA was processed and hybridized to the Affymetrix Gene 1.1 ST array at TCAG according to the manufacturer's instructions. The CEL files were quantile normalized using Expression Console (v1.1.2; Affymetrix, USA) and signal estimates determined using the RMA algorithm. Prior to clustering analysis of Group 4 medulloblastomas, 500-1000 high standard deviation (SD) genes were selected and the expression signals unlogged. Unsupervised clustering was carried out using the NMFConsensus module available on the GenePattern public server (Broad Institute, USA) with default parameters. The cophenetic coefficient metric was used to assess stability of the tested sample clusters.

### **nanoString CodeSets and data analysis**

To determine subgroup affiliation of the MAGIC cohort, a custom nanoString CodeSet was designed to assess the expression status of 22 medulloblastoma signature genes and samples processed as described in detail in a recent publication<sup>20</sup>. Samples were processed as recommended by nanoString at the University Health Network (UHN) Microarray Facility using an input of 100ng total RNA. Raw nanoString counts for each gene within each experiment were subjected to a technical normalization using the counts obtained for positive control probe sets prior to a biological normalization using the three housekeeping genes included in the CodeSet. Normalized data was log<sub>2</sub>-transformed and then used as input for class prediction analysis using the PAM method. A series of 101 medulloblastomas with known subgroup affiliation were used as a training dataset for class prediction<sup>14</sup>.

### **RNASeq library generation and data analysis**

All RNASeq was performed at the BC Cancer Agency Genome Sciences Centre (Vancouver, Canada), according to established protocols<sup>21</sup>. Samples selected for RNASeq exhibited RIN values of >7.0 as determined by Agilent bioanalyzer. RNA sequencing libraries were constructed from

2 $\mu$ g of DNaseI treated mRNA as previously described<sup>21</sup>. Paired-end libraries were sequenced on an Illumina Genome Analyzer II, generating 100bp sequence reads.

Reads were aligned to the human reference genome (National Center for Biotechnology Information Build 36.1; hg18) and a database of exon junctions<sup>22</sup>, using the Burrows-Wheeler aligner<sup>23</sup>.

### Identification of gene fusions

To identify fusion genes, we conducted *de novo* assembly of each library using Trans-ABYSS<sup>24</sup>. First, using ABySS<sup>25</sup>, reads were assembled into contigs. Since transcripts can differ widely in expression, multiple assemblies were performed in parallel using different starting *k*-mer values (i.e. substrings of *k* bp). Contigs from different assemblies were merged into a smaller non-redundant set. Paired-end information was then used to estimate inter-contig distances, and to unambiguously merge contigs into a final assembly. Final contigs were aligned to known transcripts (Ensembl, UCSC genes, RefSeq, and Aceview), and to the reference human genome. Alignments that did not match any known annotations, and those that matched multiple annotations were shortlisted as candidate large-scale rearrangements and fusion genes, respectively.

### Whole genome sequencing (WGS)

WGS was performed at the BC Cancer Agency Genome Sciences Centre (Vancouver, Canada), according to established protocols<sup>21</sup>. WGS sequence data was aligned to the reference human genome using the Burrows-Wheeler algorithm<sup>23</sup>. MB-586 was aligned to hg18, while the later samples (MB-182, MB-506, and MB-591) were aligned to hg19. Copy-number state was inferred from read alignment data using CnaSeq (<http://www.bcgsc.ca/platform/bioinfo/software/cnaseq>). CnaSeq compares read coverage between matched samples (i.e. tumor vs. normal), and reports the relative log<sub>2</sub> ratio of read depth in bins of 200bp. The analysis was repeated using a custom program that compares median read depths between matched samples in 1000kbp windows. ABySS was run to identify regions participating in large-scale rearrangements<sup>25</sup>, confirming the events identified using Trans-ABYSS, and providing accurate, base-pair resolution rearrangement breakpoints.

Large insert, paired-end WGS was also performed at the EMBL, as previously described<sup>26</sup>.

### Simulation of Progressive Genomic Rearrangements

A Monte Carlo strategy was employed to simulate the step-wise generation of the observed breakpoints. Briefly, rearrangements were randomly sampled without replacement from the observed events and successively applied to the chromosome 8 sequence. Starting with the wild-type chromosome 8 sequence, each rearrangement was applied to the current chromosomal configuration at each step. When more than one copy of the rearrangement breakpoint existed in the current configuration (e.g. because it had been duplicated), one of the possible locations was randomly picked. When a rearrangement breakpoint was no longer available (e.g. due to a previous deletion event), it was discarded and another selected. Simulations were repeated 1000 times, and for each instance we noted the maximum copy number achieved, as well as the mean copy number in excess of unamplified segments (e.g. wild-type copy number). None of the simulations reached the high-level copy number (either mean or max) of the observed amplicon.

## **Circos plot and double-minute chromosome structure**

Trans-ABYSS output was used to determine the physical connections between amplified chromosome 8 segments. Briefly, read pairs that flanked the breakpoints were used along with spanning reads (reading through the breakpoint) to link disparate amplified segments (these correspond to assembled Trans-ABYSS contigs). This process revealed in MB-586 that the 5 amplified regions are fused together in non-canonical order and orientation, and form a 2.36Mb double minute chromosome structure.

## **Identification of actionable targets**

For genes displaying significant (GISTIC) copy number gain, we searched for antagonists using various drug compound databases. The methodology is as follows:

Using gene symbols, we searched initially in the GeneCards Database (1), which provided compound information from several other sources including DrugBank (2), Human Metabolome Database (3), Tocris Bioscience (4), Novoseek, STITCH (5), Pubchem (6), and Pharmacogenomics Knowledge Base. We next queried the following databases: SuperTarget (7), Matador (8), Comparative Toxicogenomics Database (CTD, 9), Promiscuous (10) and Potential Drug Target Database (PDTD, 11). In the event of multiple drug targets, a separate entry was listed. Direct targets were defined as drug compounds with a reported physical interaction with the protein of interest, while indirect targets were compounds, which were reported to decrease gene transcript or protein expression. PubMed ID references were also provided for gene/antagonist relationships. Lastly, we determined whether identified compounds were being used in US clinical trials (12), and/or FDA approved (13).

Gene Cards: <http://www.genecards.org/>

Drug Bank: <http://www.drugbank.ca/>

HMDB: <http://www.hmdb.ca/>

Tocris Bioscience: <http://www.tocris.com/>

STITCH: <http://stitch.embl.de/>

Pubchem: <http://pubchem.ncbi.nlm.nih.gov/>

SuperTarget: <http://insilico.charite.de/supertarget/index.php?site=home>

Matador: <http://matador.embl.de/>

CTD: <http://ctdbase.org/>

Promiscuous: <http://bioinformatics.charite.de/promiscuous/index.php?site=home>

PDTD: <http://www.dddc.ac.cn/pdtd/index.php>

US Clinical Trials: <http://clinicaltrials.gov/>

FDA: <http://www.accessdata.fda.gov/scripts/cder/drugsatfda/index.cfm>

## PVT1-MYC fusion detection

RNA was converted to cDNA using SuperScript III First-Strand Synthesis SuperMix for qRT-PCR (Invitrogen, U.S.A.) following the manufacturer's instructions. To validate the PVT1-MYC and PVT1-NDRG1 fusions identified by RNASeq, PCR primers were used under the following amplification conditions: [94°C 3 min, (94°C 30 sec, 58°C 30 sec, 72°C 1 min) x 30 cycles, 72°C 5 min, 4°C hold]. PCR amplicons were cut and purified from 1% agarose gels using the QIAquick gel extraction kit (Qiagen, U.S.A.). Purified amplicon was subcloned into the TOPO TA Cloning vector pCR2.1-TOPO (Invitrogen, U.S.A.), and the plasmid was purified using the Purelink quick plasmid miniprep kit following the manufacturer's instructions, prior to Sanger sequencing.

To detect other PVT1-MYC fusions, cDNA from *MYC* amplified tumours was screened using PCR primers that anneal to PVT1 exon 1 and downstream of the *MYC* exon 2 alternative translation start site. The target locus was amplified with primers (PVT1-Ex1-F2, MYC-Ex2-Rev2) and Taq polymerase (Invitrogen, U.S.A.) [94°C 3 min, (94°C 30 sec, 58°C 30 sec, 72°C 1 min) x 30 cycles, 72°C 5 min, 4°C hold] or Phire II (NEB, U.S.A.) [98°C 30 sec, (98°C 5 sec, 63°C 5 sec, 72°C 1 min) x 40 cycles, 72°C 5 min, 4°C hold]. PCR amplicons were cut and purified from 1% agarose gels using the QIAquick gel extraction kit (Qiagen, U.S.A.). Purified amplicon was subcloned into the TOPO TA Cloning vector pCR2.1-TOPO (Invitrogen, U.S.A.), and the plasmid was purified using the Purelink quick plasmid miniprep kit following the manufacturer's instructions, prior to Sanger sequencing.

Primer sequences:

|                   |                        |
|-------------------|------------------------|
| PVT1-F1           | AGCTGGCTGAGAGGGTTGAG   |
| MYC-Exon2-R1      | TTCCAGATATCCTCGCTGGG   |
| PVT1-NDRG1-fus-Fb | CAGTGGATTTCTTGCGGA     |
| PVT1-NDRG1-fus-Rb | GAGTTGCACTCCACCACGG    |
| PVT1-Ex1-F2       | GTTGGCGGTCCCTGTGAC     |
| MYC-Ex2-Rev2      | CCTGTTGGTGAAGCTAACGTTG |

## TaqMan qPCR of miR-1204, 1205, 1207

Total RNA (2ug) was reverse transcribed to cDNA using the TaqMan MicroRNA Reverse Transcription Kit (Applied Biosystems, USA). The miRNA specific primers for hsa-miR-1204 (002872), hsa-miR-1205 (002778), hsa-miR-1207-3P (002826) and RNU6B (001093) were multiplexed in the reverse transcription reactions: 16°C 30 min, 42°C 60 min, 85°C 5 min. Taqman qPCR reactions were run in triplicates and contained 154 ng/well of converted total RNA. Preliminary results showed hsa-miR-1206 (002878) was not detectable and was excluded from the experiment.

The expression level of target miRNAs was determined using the ddCT method,<sup>27</sup> after adjusting the cycle threshold (CT) for plate-to-plate variation with a calibrator sample. The CT values were subsequently normalized against the endogenous control (RNU6B), and the resulting dCT values for each target were expressed relative to the mean of the reference samples. Tumour samples that were balanced at the miRNA locus served as the references.

## ***CTNNB1* mutation analysis**

Seventy-one medulloblastoma samples were analyzed for mutations of the *CTNNB1* gene by direct sequencing. Genomic DNA was subjected to PCR for the amplification of *CTNNB1* from exon 2 to exon 4 using primers BCATEx2F (GAAAATCCAGCGTGGACAATG) and BCATEx4R (TCGAGTCATTGCATACTGTCC) with Platinum Pfx DNA Polymerase (Invitrogen) under the following conditions: 94°C for 3 min; 35 cycles of 94°C for 30 sec, 60°C for 30 sec, and 68°C for 2 min; and then a final extension step of 68°C for 7 min. The 630bp PCR product was then purified using PureLink™ PCR Purification Kit (Invitrogen), followed by sequencing using primers BCATEx3F (GCTGATTTGATGGAGTTGGAC) and BCATEx3R (AAGGACTGAGAAAATCCCTGTTTC).

## **Cell lines, cell culture and transfections**

The ONS76 cell line was obtained from the Institute for Fermentation (Osaka, Japan). The MED8A cell line was obtained from Dr. Richard J. Gilbertson (St Jude Children's Research Hospital, Memphis, TN). ONS76 was maintained in culture in Dulbecco modified Eagle medium (DMEM) supplemented with 10% FBS and 1x antibiotic/antiMYCotic solution. MED8A was cultured in DMEM supplemented with 20% FBS and 1x antibiotic/antiMYCotic solution. All cell lines were kept at 37°C, in 5% CO<sub>2</sub>. Media and reagents for cell culture were purchased from Wisent, Inc (St Bruno, Quebec, Canada). Anti hsa-miR1204 (TAATGGAGACCAGGCCACG) and Negative CTL A (GTGTAACACGCTATACGCCCA) were purchased from Exiqon Life Science (miRCURY LNA™ microRNA Inhibitor cat: 411266-04 and 199004-04 respectively). MYC silencing was performed with a siRNA: CGAUUCCUUCUACAGAAAUU (Dharmacon).

## **MTS Cell Proliferation Assay**

The Promega CellTiter 96 Aqueous One Solution Cell Proliferation Assay was used, as per the manufacturer's instructions (Promega, Madison, WI). Low confluence ONS76 and MED8A were transfected with 10pmol of oligonucleotides with X-tremeGENE siRNA Transfection Reagent (Roche) as recommended by the manufacturer. Proliferation was measured starting from 18h after transfection (t=0) for a 72-hour period. Average O.D. at 490nm of two different experiments (each conducted in triplicate) is shown; statistical significance at 72h post transfection was assessed by T-Test.

## **Statistical and bioinformatic analyses**

Statistical and bioinformatic analyses were performed in the R statistical environment (v2.13) or using custom programs/scripts written in Python, C++, or Go. Enrichment analyses were done using the hypergeometric test. The significance of chromosome arm frequencies were done using the exact binomial test, comparing the observed frequency to the expected frequency derived from a robust regression of event frequency and gene content, in a similar manner to the 'broad analysis' in GISTIC2. Comparisons of event frequencies across medulloblastoma subgroups were performed using Fisher's exact test. Expressions of genes across samples were compared using the Mann-Whitney test (and confirmed with the Student's independent t-test). Where applicable, multiple hypothesis corrections were performed using the false discovery rate method<sup>11</sup>. Univariate survival analyses were done using the log-rank test, as implemented in the survival R package (v2.36).

## References

1. Kennedy, G.C. et al. Large-scale genotyping of complex DNA. *Nature biotechnology* **21**, 1233-7 (2003).
2. Korn, J.M. et al. Integrated genotype calling and association analysis of SNPs, common copy number polymorphisms and rare CNVs. *Nature genetics* **40**, 1253-60 (2008).
3. McCarroll, S.A. et al. Integrated detection and population-genetic analysis of SNPs and copy number variation. *Nature genetics* **40**, 1166-74 (2008).
4. Purcell, S. et al. PLINK: a tool set for whole-genome association and population-based linkage analyses. *American journal of human genetics* **81**, 559-75 (2007).
5. Lin, M. et al. dChipSNP: significance curve and clustering of SNP-array-based loss-of-heterozygosity data. *Bioinformatics* **20**, 1233-40 (2004).
6. Venkatraman, E.S. & Olshen, A.B. A faster circular binary segmentation algorithm for the analysis of array CGH data. *Bioinformatics* **23**, 657-63 (2007).
7. Iafrate, A.J. et al. Detection of large-scale variation in the human genome. *Nat Genet* **36**, 949-51 (2004).
8. Mermel, C.H. et al. GISTIC2.0 facilitates sensitive and confident localization of the targets of focal somatic copy-number alteration in human cancers. *Genome Biol* **12**, R41 (2011).
9. Zhang, Q. et al. CMDS: a population-based method for identifying recurrent DNA copy number aberrations in cancer from high-resolution data. *Bioinformatics* **26**, 464-9 (2010).
10. Wu, Z., Huang, N.E., Long, S.R. & Peng, C.K. On the trend, detrending, and variability of nonlinear and nonstationary time series. *Proc Natl Acad Sci U S A* **104**, 14889-94 (2007).
11. Storey, J.D. & Tibshirani, R. Statistical significance for genomewide studies. *Proc Natl Acad Sci U S A* **100**, 9440-5 (2003).
12. Rausch, T. et al. Genome Sequencing of Pediatric Medulloblastoma Links Catastrophic DNA Rearrangements with TP53 Mutations. *Cell* **148**, 59-71 (2012).
13. Parsons, D.W. et al. The genetic landscape of the childhood cancer medulloblastoma. *Science* **331**, 435-9 (2011).
14. Northcott, P.A. et al. Medulloblastoma comprises four distinct molecular variants. *Journal of clinical oncology : official journal of the American Society of Clinical Oncology* **29**, 1408-14 (2011).
15. Cho, Y.J. et al. Integrative genomic analysis of medulloblastoma identifies a molecular subgroup that drives poor clinical outcome. *J Clin Oncol* **29**, 1424-30 (2011).
16. Lee, E.Y. et al. Hedgehog pathway-regulated gene networks in cerebellum development and tumorigenesis. *Proc Natl Acad Sci U S A* **107**, 9736-41 (2010).
17. Miller, C.A., Settle, S.H., Sulman, E.P., Aldape, K.D. & Milosavljevic, A. Discovering functional modules by identifying recurrent and mutually exclusive mutational patterns in tumors. *BMC Med Genomics* **4**, 34 (2011).
18. Reimand, J., Arak, T. & Vilo, J. g:Profiler--a web server for functional interpretation of gene lists (2011 update). *Nucleic acids research* **39**, W307-15 (2011).

19. Merico, D., Isserlin, R., Stueker, O., Emili, A. & Bader, G.D. Enrichment map: a network-based method for gene-set enrichment visualization and interpretation. *PloS one* **5**, e13984 (2010).
20. Northcott, P.A. et al. Rapid, reliable, and reproducible molecular sub-grouping of clinical medulloblastoma samples. *Acta neuropathologica* **123**, 615-26 (2012).
21. Shah, S.P. et al. Mutational evolution in a lobular breast tumour profiled at single nucleotide resolution. *Nature* **461**, 809-13 (2009).
22. Morin, R. et al. Profiling the HeLa S3 transcriptome using randomly primed cDNA and massively parallel short-read sequencing. *BioTechniques* **45**, 81-94 (2008).
23. Li, H. & Durbin, R. Fast and accurate short read alignment with Burrows-Wheeler transform. *Bioinformatics* **25**, 1754-60 (2009).
24. Robertson, G. et al. De novo assembly and analysis of RNA-seq data. *Nature methods* **7**, 909-12 (2010).
25. Simpson, J.T. et al. ABySS: a parallel assembler for short read sequence data. *Genome research* **19**, 1117-23 (2009).
26. Korbel, J.O. et al. Paired-end mapping reveals extensive structural variation in the human genome. *Science* **318**, 420-6 (2007).
27. Livak, K.J. & Schmittgen, T.D. Analysis of relative gene expression data using real-time quantitative PCR and the 2(-Delta Delta C(T)) Method. *Methods* **25**, 402-8 (2001).
